# Supplementary material for: Iodine-catalyzed convergent aerobic dehydro-aromatization toward benzazoles and benzazines
Source: Royal Society of Chemistry journal article supplement (doi:10.1039/c9ra10964a), 2020-01-01

## Supporting Information

### Iodine-Catalyzed Convergent Aerobic Dehydro-Aromatization toward Benzazoles and Benzazines

Xiaolong Tuo, Shanping Chen,\* Pingyu Jiang, Penghui Ni, Xiaodong Wang, and  
Guo-Jun Deng\*

Key Laboratory for Green Organic Synthesis and Application of Hunan Province,  
Key Laboratory of Environmentally Friendly Chemistry and Application of Ministry  
of Education, College of Chemistry, Xiangtan University, Xiangtan 411105, China,  
Fax: (+86)-731-58292251; E-mail: spchen@xtu.edu.cn., E-mail: gjdeng@xtu.edu.cn

#### Table of Contents

|                                                                             |            |
|-----------------------------------------------------------------------------|------------|
| <b>1. General information.....</b>                                          | <b>S2</b>  |
| <b>2. General procedure for the 2-phenylbenzo[d]thiazole synthesis.....</b> | <b>S2</b>  |
| <b>3. Characterization data of products.....</b>                            | <b>S3</b>  |
| <b>4. References .....</b>                                                  | <b>S19</b> |
| <b>5. <sup>1</sup>H NMR and <sup>13</sup>C NMR spectra of products.....</b> | <b>S20</b> |

## 1. General information.

All reactions were carried out under the standard conditions unless otherwise noted. Column chromatography was performed using silica gel (100-200 mesh). <sup>1</sup>H NMR and <sup>13</sup>C NMR spectra were recorded on Bruker-AV (400 and 100 MHz, respectively) instrument internally referenced to tetramethylsilane (TMS) or chloroform signals. Mass spectra were measured on Agilent 5975 GC-MS instrument (EI). High-resolution mass spectra were recorded at Keecloud (Shanghai) Biotechnology co. LTD. HRMS was conducted using electrospraying ionization (ESI) and was performed on a Thermo Scientific LTQ Orbitrap XL. The structures of known compounds were further corroborated by comparing their <sup>1</sup>H NMR, <sup>13</sup>C NMR data and MS data with those of literature. All reagents were obtained from commercial suppliers and used without further purification.

## 2. General procedure for the 2-phenylbenzo[*d*]thiazole synthesis

2-phenyl-4,5,6,7-tetrahydrobenzo[*d*]thiazole (**1a**, 43.0 μL, 0.2 mmol), I<sub>2</sub> (20 mol%, 10.2 mg), *o*-DCB (0.8 mL), toluene (0.2 mL) were added to a 10 mL reaction vessel. The sealed reaction vessel under oxygen atmosphere was stirred at 160 °C for 30 h. After cooling to room temperature, the volatiles were removed under reduced pressure. The residue was purified by column chromatography on silica gel (petroleum ether/EtOAc = 100:1) to yield the desired product **4a** as white solid (31.6 mg, 75% yield).

**6 mmol scale:** 2-phenyl-4,5,6,7-tetrahydrobenzo[*d*]thiazole (**1a**, 1290.0 mg, 6 mmol), I<sub>2</sub> (304.6 mg, 1.2 mmol), *o*-DCB (8 mL), toluene (2 mL), were added to a 50 mL reaction vessel. The sealed reaction vessel under oxygen atmosphere was stirred at 160 °C for 30 h. After cooling to room temperature, the volatiles were removed under reduced pressure. The residue was purified by column chromatography on silica gel (petroleum ether/EtOAc = 100:1) to yield the desired product as white solid (860.8 mg, 68% yield).

### 3. Characterization data of products

#### 2-Phenylbenzo[*d*]thiazole (**4a**, CAS: 833-93-2)<sup>[1]</sup>

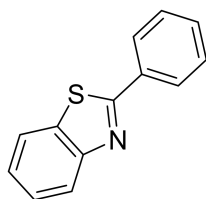

The reaction was conducted with 2-phenyl-4,5,6,7-tetrahydrobenzo[*d*]thiazole (**1a**, 43.0  $\mu$ L, 0.2 mmol), I<sub>2</sub> (20 mol%, 10.2 mg). The residue was purified by column chromatography on silica gel (petroleum ether/EtOAc = 100:1) to yield the desired product **4a** as white solid (31.6 mg, 75% yield), mp 113-116 °C.

<sup>1</sup>H NMR (400 MHz, Chloroform-*d*)  $\delta$  8.11-8.06 (m, 3H), 7.87 (d, *J* = 8.4 Hz, 1H), 7.51-7.46 (m, 4H), 7.39-7.34 (m, 1H); <sup>13</sup>C NMR (100 MHz, Chloroform-*d*)  $\delta$  168.0, 154.1, 135.0, 133.5, 130.9, 129.0, 127.5, 126.3, 125.1, 123.1, 121.6.

#### 2-(*p*-Tolyl)benzo[*d*]thiazole (**4b**, CAS: 16112-21-3)<sup>[1]</sup>

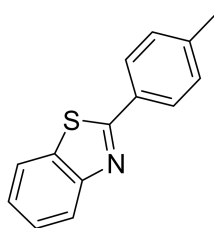

The reaction was conducted with 2-(*p*-tolyl)-4,5,6,7-tetrahydrobenzo[*d*]thiazole (**1b**, 45.8 mg, 0.2 mmol), I<sub>2</sub> (20 mol%, 10.2 mg). The residue was purified by column chromatography on silica gel (petroleum ether/EtOAc = 100:1) to yield the desired product **4b** as pale white solid (33.3 mg, 74% yield), mp 84-86 °C.

<sup>1</sup>H NMR (400 MHz, Chloroform-*d*)  $\delta$  8.05 (d, *J* = 8.4 Hz, 1H), 7.98 (d, *J* = 8.0 Hz, 2H), 7.88 (d, *J* = 8.0 Hz, 1H), 7.50-7.46 (m, 1H), 7.39-7.35 (m, 1H), 7.29 (d, *J* = 8.0 Hz, 2H), 2.38 (s, 3H); <sup>13</sup>C NMR (100 MHz, Chloroform-*d*)  $\delta$  168.3, 154.2, 141.5, 135.0, 131.0, 129.8, 127.5, 126.3, 125.0, 123.1, 121.6, 21.6.

#### 2-(4-(*t*-Butyl)phenyl)benzo[*d*]thiazole (**4c**, CAS: 1242329-99-2)<sup>[1]</sup>

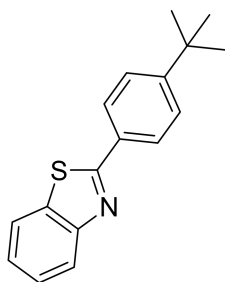

The reaction was conducted with 2-(4-(*t*-butyl)phenyl)-4,5,6,7-tetrahydrobenzo[*d*]thiazole (**1c**, 57.2  $\mu$ L, 0.2 mmol), I<sub>2</sub> (20 mol%, 10.2 mg). The residue was purified by column chromatography on silica gel (petroleum ether/EtOAc = 100:1) to yield the desired product **4c** as pale yellow solid (37.9 mg, 71% yield), mp 106-107 °C.

<sup>1</sup>H NMR (400 MHz, Chloroform-*d*)  $\delta$  8.06 (d, *J* = 8.0 Hz, 1H), 8.04-8.00 (m, 2H), 7.87 (d, *J* = 8.0 Hz, 1H), 7.52-7.45 (m, 3H), 7.38-7.34 (m, 1H), 1.36 (s, 9H); <sup>13</sup>C NMR (100 MHz, Chloroform-*d*)  $\delta$  168.1, 154.5, 154.2, 135.0, 130.9, 127.3, 126.2, 126.0, 125.0, 123.0, 121.6, 35.0, 31.1.

#### 2-([1,1'-Biphenyl]-4-yl)benzo[*d*]thiazole (**4d**, CAS: 67362-98-5)<sup>[1]</sup>

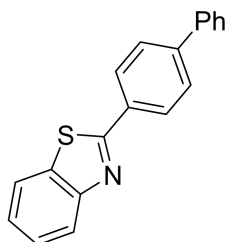

The reaction was conducted with 2-([1,1'-biphenyl]-4-yl)-4,5,6,7-tetrahydrobenzo[*d*]thiazole (**1d**, 58.2 mg, 0.2 mmol), I<sub>2</sub> (20 mol%, 10.2 mg). The residue was purified by column chromatography on silica gel (petroleum ether/EtOAc = 100:1) to yield the desired product **4d** as pale yellow solid (36.7 mg, 64% yield), mp 191-192 °C.

<sup>1</sup>H NMR (400 MHz, Chloroform-*d*)  $\delta$  8.17 (d, *J* = 8.4 Hz, 2H), 8.09 (d, *J* = 8.4 Hz, 1H), 7.92 (d, *J* = 8.0 Hz, 1H), 7.73 (d, *J* = 9.6 Hz, 2H), 7.68-7.66 (m, 2H), 7.53-7.47 (m, 3H), 7.42-7.38 (m, 2H); <sup>13</sup>C NMR (100 MHz, Chloroform-*d*)  $\delta$  167.7, 154.2, 143.7, 140.1, 135.1, 132.5, 128.9, 128.0, 128.0, 127.6, 127.1, 126.3, 125.2, 123.2, 121.6.

#### 2-(4-Methoxyphenyl)benzo[*d*]thiazole (**4e**, CAS: 6265-92-5)<sup>[1]</sup>

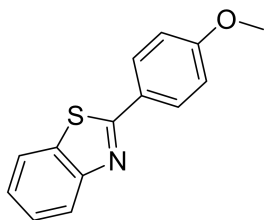

The reaction was conducted with 2-(4-methoxyphenyl)-4,5,6,7-tetrahydrobenzo[*d*]thiazole (**1e**, 49.0 mg, 0.2 mmol), I<sub>2</sub> (20 mol%, 10.2 mg). The residue was purified by column chromatography on silica gel (petroleum ether/EtOAc = 60:1) to yield the desired product **4e** as pale white solid (29.4 mg, 61% yield), mp 122-124 °C.

<sup>1</sup>H NMR (400 MHz, Chloroform-*d*) δ 8.02 (d, *J* = 8.8 Hz, 3H), 7.86 (d, *J* = 8.0 Hz, 1H), 7.49-7.44 (m, 1H), 7.36-7.34 (m, 1H), 7.01-6.97 (m, 2H), 3.87 (s, 3H); <sup>13</sup>C NMR (100 MHz, Chloroform-*d*) δ 167.8, 161.9, 154.1, 134.8, 129.0, 126.3, 126.2, 124.7, 122.8, 121.5, 114.3, 55.4.

#### 2-(4-Fluorophenyl)benzo[*d*]thiazole (**4f**, CAS: 1629-26-1)<sup>[2]</sup>

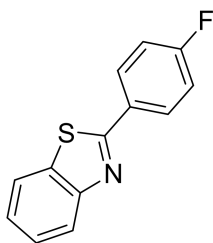

The reaction was conducted with 2-(4-fluorophenyl)-4,5,6,7-tetrahydrobenzo[*d*]thiazole (**1f**, 46.6 mg, 0.2 mmol), I<sub>2</sub> (20 mol%, 10.2 mg). The residue was purified by column chromatography on silica gel (petroleum ether/EtOAc = 100:1) to yield the desired product **4f** as pale yellow solid (27.0 mg, 59% yield), mp 99-100 °C.

<sup>1</sup>H NMR (400 MHz, Chloroform-*d*) δ 8.09-8.05 (m, 3H), 7.88 (d, *J* = 8.0 Hz, 1H), 7.51-7.47 (m, 1H), 7.40-7.36 (m, 1H), 7.19-7.15 (m, 2H); <sup>13</sup>C NMR (100 MHz, Chloroform-*d*) δ 166.2 (d, *J* = 105.6 Hz), 163.2, 153.9, 134.9, 129.8 (d, *J* = 13.2 Hz), 129.5 (d, *J* = 8.6 Hz), 126.4, 125.2, 123.1, 121.6, 116.1 (d, *J* = 22.1 Hz).

#### 2-(4-Bromophenyl)benzo[*d*]thiazole (**4g**, CAS: 19654-19-4)<sup>[2]</sup>

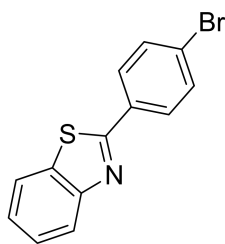

The reaction was conducted with 2-(4-bromophenyl)-4,5,6,7-tetrahydrobenzo[*d*]thiazole (**1g**, 58.8 mg, 0.2 mmol), I<sub>2</sub> (20 mol%, 10.2 mg). The residue was purified by column chromatography on silica gel (petroleum ether/EtOAc = 100:1) to yield the desired product **4g** as pale yellow solid (33.6 mg, 58% yield), mp 125-127 °C.

<sup>1</sup>H NMR (400 MHz, Chloroform-*d*) δ 8.08 (d, *J* = 8.4 Hz, 1H), 7.97 (d, *J* = 8.8 Hz, 2H), 7.90 (d, *J* = 7.6 Hz, 1H), 7.63 (d, *J* = 8.8 Hz, 2H), 7.53-7.50 (m, 1H), 7.44-7.40 (m, 1H); <sup>13</sup>C NMR (100 MHz, Chloroform-*d*) δ 166.7, 154.0, 135.0, 132.6, 132.3, 128.9, 126.5, 125.4, 125.4, 123.3, 121.6.

#### 2-(2-Methoxyphenyl)benzo[*d*]thiazole (**4h**, CAS: 6269-47-2)<sup>[2]</sup>

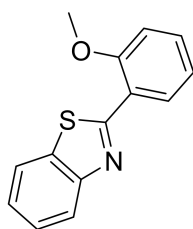

The reaction was conducted with 2-(2-methoxyphenyl)-4,5,6,7-tetrahydrobenzo[*d*]thiazole (**1h**, 49.0 mg, 0.2 mmol), I<sub>2</sub> (20 mol%, 10.2 mg). The residue was purified by column chromatography on silica gel (petroleum ether/EtOAc = 100:1) to yield the desired product **4h** as white solid (28.4 mg, 59% yield), mp 90-91 °C.

<sup>1</sup>H NMR (400 MHz, Chloroform-*d*) δ 8.07 (d, *J* = 8.4 Hz, 1H), 7.88 (d, *J* = 8.0 Hz, 1H), 7.68-7.62 (m, 2H), 7.51-7.46 (m, 1H), 7.40-7.36 (m, 2H), 7.03 (d, *J* = 8.4 Hz, 1H), 3.91 (s, 3H); <sup>13</sup>C NMR (100 MHz, Chloroform-*d*) δ 167.9, 160.0, 154.0, 135.0, 134.8, 130.0, 126.3, 125.2, 123.2, 121.6, 120.2, 117.3, 111.9, 55.5.

#### 2-(2-Chlorophenyl)benzo[*d*]thiazole (**4i**, CAS: 6269-46-1)<sup>[2]</sup>

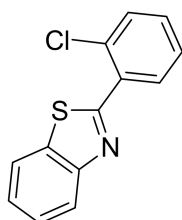

The reaction was conducted with 2-(2-chlorophenyl)-4,5,6,7-tetrahydrobenzo[*d*]thiazole (**1i**, 49.8 mg, 0.2 mmol), I<sub>2</sub> (20 mol%, 10.2 mg). The residue was purified by column chromatography on silica gel (petroleum ether/EtOAc = 100:1) to yield the desired product **4i** as pale white solid (27.4 mg, 56% yield), mp 85-86 °C.

<sup>1</sup>H NMR (400 MHz, Chloroform-*d*) δ 8.23-8.21 (m, 1H), 8.14 (d, *J* = 8.0 Hz, 1H), 7.96 (d, *J* = 8.0 Hz, 1H), 7.56-7.52 (m, 2H), 7.46-7.41 (m, 3H); <sup>13</sup>C NMR (100 MHz, Chloroform-*d*) δ 164.1, 152.5, 136.1, 132.6, 132.2, 131.7, 131.1, 130.8, 127.1, 126.3, 125.4, 123.4, 121.3.

### 2-(Naphthalen-1-yl)benzo[*d*]thiazole (**4j**, CAS: 56048-50-1)<sup>[3]</sup>

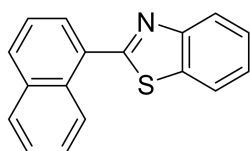

The reaction was conducted with 2-(4-methoxyphenyl)-4,5,6,7-tetrahydrobenzo[*d*]thiazole (**1j**, 53.0 mg, 0.2 mmol), I<sub>2</sub> (20 mol%, 10.2 mg). The residue was purified by column chromatography on silica gel (petroleum ether/EtOAc = 80:1) to yield the desired product **4j** as pale white solid (37.0 mg, 71% yield), mp 123-126 °C.

<sup>1</sup>H NMR (400 MHz, Chloroform-*d*) δ 8.96 (d, *J* = 8.8 Hz, 1H), 8.22 (d, *J* = 8.4 Hz, 1H), 8.02-7.92 (m, 4H), 7.66-7.55 (m, 4H), 7.46-7.42 (m, 1H); <sup>13</sup>C NMR (100 MHz, Chloroform-*d*) δ 167.6, 154.2, 135.5, 134.0, 131.1, 130.8, 130.6, 129.4, 128.4, 127.7, 126.5, 126.3, 125.9, 125.3, 125.0, 123.7, 121.4.

### 2-(Naphthalen-2-yl)benzo[*d*]thiazole (**4k**, CAS: 56048-51-2)<sup>[3]</sup>

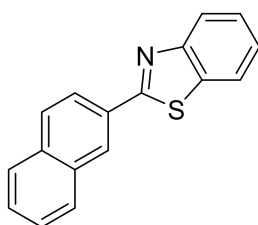

The reaction was conducted with 2-(naphthalen-2-yl)-4,5,6,7-tetrahydrobenzo[*d*]thiazole (**1k**, 53.0 mg, 0.2 mmol), I<sub>2</sub> (20 mol%, 10.2 mg). The residue was purified by column chromatography on silica gel (petroleum ether/EtOAc = 80:1) to yield the desired product **4k** as pale white solid (34.4 mg, 66% yield), mp 98-100 °C.

<sup>1</sup>H NMR (400 MHz, Chloroform-*d*)  $\delta$  8.55 (s, 1H), 8.19 (d, *J* = 8.4 Hz, 1H), 8.10 (d, *J* = 8.0 Hz, 1H), 7.95-7.84 (m, 4H), 7.54-7.48 (m, 3H), 7.38 (t, *J* = 7.6 Hz, 1H); <sup>13</sup>C NMR (100 MHz, Chloroform-*d*)  $\delta$  168.1, 154.2, 135.1, 134.6, 133.1, 131.0, 128.8, 128.8, 127.8, 127.5, 127.4, 126.8, 126.4, 125.2, 124.4, 123.2, 121.6.

**6-Ethyl-2-phenylbenzo[*d*]thiazole (4l, CAS: 124-303-5)<sup>[3]</sup>**

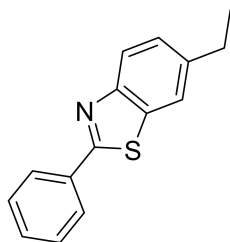

The reaction was conducted with 6-ethyl-2-phenyl-4,5,6,7-tetrahydrobenzo[*d*]thiazole (**1l**, 48.6 mg, 0.2 mmol), I<sub>2</sub> (20 mol%, 10.2 mg). The residue was purified by column chromatography on silica gel (petroleum ether/EtOAc = 100:1) to yield the desired product **4l** as pale white solid (29.6 mg, 62% yield), mp 58-60 °C.

<sup>1</sup>H NMR (400 MHz, Chloroform-*d*)  $\delta$  8.09-8.06 (m, 2H), 7.97 (d, *J* = 8.4 Hz, 1H), 7.71 (s, 1H), 7.50-7.47 (m, 3H), 7.34-7.32 (m, 1H), 2.78 (q, *J* = 7.6 Hz, 2H), 1.31 (t, *J* = 7.8 Hz, 3H); <sup>13</sup>C NMR (100 MHz, Chloroform-*d*)  $\delta$  167.1, 152.4, 141.2, 135.2, 133.8, 130.7, 128.9, 127.4, 126.8, 122.8, 120.1, 28.9, 15.8.

**6-(*t*-Butyl)-2-phenylbenzo[*d*]thiazole (4m, CAS: 1242329-99-2)<sup>[3]</sup>**

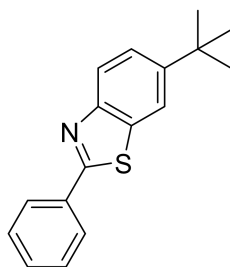

The reaction was conducted with 6-(*t*-butyl)-2-phenyl-4,5,6,7-tetrahydrobenzo[*d*]thiazole (**1m**, 54.2 mg, 0.2 mmol), I<sub>2</sub> (20 mol%, 10.2 mg). The residue was purified by column chromatography on silica gel (petroleum ether/EtOAc = 100:1) to yield the desired product **4m** as pale white solid (35.7 mg, 67% yield), mp 105-106 °C.



$^1\text{H}$  NMR (400 MHz, Chloroform-*d*)  $\delta$  8.09-8.06 (m, 2H), 8.00 (d,  $J$  = 8.8 Hz, 1H), 7.89 (d,  $J$  = 2.0 Hz, 1H), 7.56-7.53 (m, 1H), 7.49-7.47 (m, 3H), 1.40 (s, 9H);  $^{13}\text{C}$  NMR (100 MHz, Chloroform-*d*)  $\delta$  167.4, 152.1, 148.7, 135.1, 133.8, 130.7, 129.0, 127.4, 124.6, 122.5, 117.7, 35.0, 31.5.

#### 2,6-Diphenylbenzo[*d*]thiazole(4n)<sup>[4]</sup>

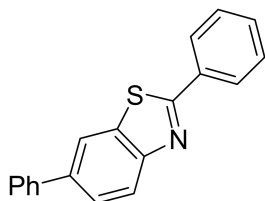

The reaction was conducted with 2,6-diphenyl-4,5,6,7-tetrahydrobenzo[*d*]thiazole (**1n**, 58.2 mg, 0.2 mmol),  $\text{I}_2$  (20 mol%, 10.2 mg). The residue was purified by column chromatography on silica gel (petroleum ether/EtOAc = 100:1) to yield the desired product **4n** as pale white solid (42.5 mg, 74% yield), mp 185-186 °C.

$^1\text{H}$  NMR (400 MHz, Chloroform-*d*)  $\delta$  8.13-8.10 (m, 4H), 7.75-7.72 (m, 1H), 7.68-7.66 (m, 2H), 7.53-7.46 (m, 5H), 7.41-7.36 (m, 1H);  $^{13}\text{C}$  NMR (100 MHz, Chloroform-*d*)  $\delta$  168.2, 153.5, 140.6, 138.6, 135.8, 133.6, 131.0, 129.0, 128.9, 127.5, 127.3, 127.4, 126.0, 123.3, 119.9.

#### 1-benzyl-2-phenyl-1H-benzo[*d*]imidazole (4o, CAS: 739-88-8)<sup>[5]</sup>

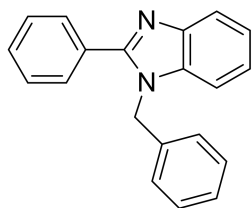

The reaction was conducted with 1-benzyl-2-phenyl-4,5,6,7-tetrahydro-1H-benzo[*d*]imidazole (**1o**, 57.6 mg, 0.2 mmol),  $\text{I}_2$  (20 mol%, 10.2 mg). The residue was purified by column chromatography on silica gel (petroleum ether/EtOAc = 5:1) to yield the desired product **4o** as white solid (31.8 mg, 56% yield), mp 133-135 °C.

$^1\text{H}$  NMR (400 MHz, Chloroform-*d*)  $\delta$  7.87 (d,  $J$  = 8.0 Hz, 1H), 7.70-7.68 (m, 2H), 7.48-7.42 (m, 3H), 7.35-7.29 (m, 4H), 7.25-7.20 (m, 2H), 7.10 (d,  $J$  = 6.8 Hz, 2H), 5.46 (s, 2H);  $^{13}\text{C}$  NMR (100 MHz, Chloroform-*d*)  $\delta$  154.1, 143.2, 136.4, 136.0, 130.0, 129.9, 129.2, 129.0, 128.7, 127.7, 126.0, 123.0, 122.6, 119.9, 110.5, 48.3.

**Benzo[*d*]benzo[4,5]imidazo[2,1-*b*]thiazole (5a, CAS: 206-80-4 )<sup>[6]</sup>**

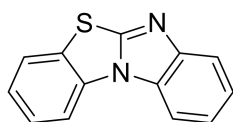

The reaction was conducted with 7,8,9,10-tetrahydrobenzo[*d*]benzo[4,5]imidazo[2,1-*b*]thiazole (**2a**, 45.6 mg, 0.2 mmol), I<sub>2</sub> (20 mol%, 10.2 mg). The residue was purified by column chromatography on silica gel (eluent = dichloromethane) to yield the desired product **5a** as white solid (31.8 mg, 71% yield), mp 138-139 °C.

<sup>1</sup>H NMR (400 MHz, Chloroform-*d*) δ 7.96 (d, *J* = 8.4 Hz, 2H), 7.84 (d, *J* = 8.0 Hz, 1H), 7.74 (d, *J* = 8.0 Hz, 1H), 7.56-7.51 (m, 1H), 7.45-7.36 (m, 3H); <sup>13</sup>C NMR (100 MHz, Chloroform-*d*) δ 155.4, 148.2, 133.3, 130.5, 129.0, 126.7, 124.4, 124.3, 123.6, 122.0, 119.5, 112.4, 110.6.

**3-Methylbenzo[*d*]benzo[4,5]imidazo[2,1-*b*]thiazole (5b, CAS: 1611489-26-9)<sup>[6]</sup>**

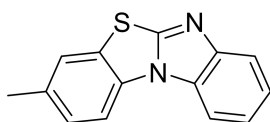

The reaction was conducted with 3-methyl-7,8,9,10-tetrahydrobenzo[*d*]benzo[4,5]imidazo[2,1-*b*]thiazole (**2b**, 48.4 mg, 0.2 mmol), I<sub>2</sub> (20 mol%, 10.2 mg). The residue was purified by column chromatography on silica gel (eluent = dichloromethane) to yield the desired product **5b** as white solid (29.9 mg, 63% yield), mp 140-142 °C.

<sup>1</sup>H NMR (400 MHz, Chloroform-*d*) δ 7.93-7.71 (m, 1H), 7.82 (t, *J* = 7.2 Hz, 2H), 7.53 (s, 1H), 7.43-7.31 (m, 3H), 2.48 (s, 3H); <sup>13</sup>C NMR (100 MHz, Chloroform-*d*) δ 155.3, 148.1, 134.4, 131.0, 130.4, 129.0, 127.5, 124.4, 123.3, 121.7, 119.4, 111.9, 110.4, 21.3.

**3-Fluorobenzo[*d*]benzo[4,5]imidazo[2,1-*b*]thiazole (5c, CAS: 1611489-29-0 )<sup>[6]</sup>**

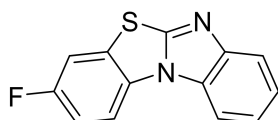

The reaction was conducted with 3-fluoro-7,8,9,10-tetrahydrobenzo[*d*]benzo[4,5]imidazo[2,1-*b*]thiazole (**2c**, 49.2 mg, 0.2 mmol), I<sub>2</sub> (20 mol%, 10.2 mg). The residue was purified by column chromatography on silica gel (eluent = dichloromethane) to yield the desired product **5c** as white solid (33.8 mg, 70% yield), mp 145-146 °C.

<sup>1</sup>H NMR (400 MHz, Chloroform-*d*) δ 7.92-7.90 (m, 2H), 7.84-7.82 (m, 1H), 7.63 (d, *J* = 8.4 Hz,

1H), 7.45-7.33 (m, 3H); <sup>13</sup>C NMR (100 MHz, Chloroform-*d*) δ 159.4 (d, *J* = 245.4 Hz), 155.0, 148.0, 130.5, 130.4 (d, *J* = 9.4 Hz), 129.7, 123.6, 122.2, 119.7, 114.1 (d, *J* = 24.5 Hz), 112.8 (d, *J* = 8.9 Hz), 111.6 (d, *J* = 27.3 Hz), 110.2.

**3-Chlorobenzo[*d*]benzo[4,5]imidazo[2,1-*b*]thiazole (5d, CAS: 1403604-83-0 )**<sup>[6]</sup>

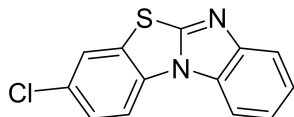

The reaction was conducted with 3-chloro-7,8,9,10-tetrahydrobenzo[*d*]benzo[4,5]imidazo[2,1-*b*]thiazole (**2d**, 52.4 mg, 0.2 mmol), I<sub>2</sub> (20 mol%, 10.2 mg). The residue was purified by column chromatography on silica gel (eluent = dichloromethane) to yield the desired product **5d** as white solid (35.1 mg, 68% yield), mp 206-208 °C.

<sup>1</sup>H NMR (400 MHz, Chloroform-*d*) δ 7.87 (m, 2H), 7.80 (m, 1H), 7.64 (d, *J* = 8.0 Hz, 1H), 7.42-7.34 (m, 2H), 7.31 (m, 1H); <sup>13</sup>C NMR (100 MHz, Chloroform-*d*) δ 155.5, 148.2, 133.8, 132.7, 130.2, 127.3, 124.9, 124.5, 123.9, 122.3, 119.6, 112.7, 110.5.

**9-Methylbenzo[*d*]benzo[4,5]imidazo[2,1-*b*]thiazole (5e, CAS: 1611489-29-2 )**<sup>[6]</sup>

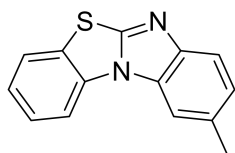

The reaction was conducted with 9-methyl-7,8,9,10-tetrahydrobenzo[*d*]benzo[4,5]imidazo[2,1-*b*]thiazole (**2e**, 48.4 mg, 0.2 mmol), I<sub>2</sub> (20 mol%, 10.2 mg). The residue was purified by column chromatography on silica gel (eluent = dichloromethane) to yield the desired product **5e** as white solid (30.4 mg, 64% yield), mp 212- 213 °C.

<sup>1</sup>H NMR (400 MHz, Chloroform-*d*) δ 7.91 (d, *J* = 8.0 Hz, 1H), 7.73-7.69 (m, 3H), 7.52 (t, *J* = 7.8 Hz, 1H), 7.34 (t, *J* = 7.6 Hz, 1H), 7.22 (d, *J* = 7.6 Hz, 1H), 2.58 (s, 3H); <sup>13</sup>C NMR (100 MHz, Chloroform-*d*) δ 154.7, 154.6, 146.3, 133.2, 131.9, 129.0, 126.6, 124.9, 124.2, 124.2, 118.9, 112.3, 110.7, 21.8.

**9-Phenylbenzo[*d*]benzo[4,5]imidazo[2,1-*b*]thiazole (5f)**

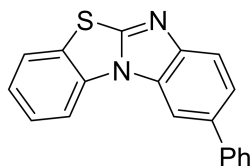

The reaction was conducted with 9-phenyl-7,8,9,10-tetrahydrobenzo[*d*]benzo[4,5]imidazo[2,1-*b*]thiazole (**2f**, 60.8 mg, 0.2 mmol), I<sub>2</sub> (20 mol%, 10.2 mg). The residue was purified by column chromatography on silica gel (eluent = dichloromethane) to yield the desired product **5f** as pale white solid (42.6 mg, 71% yield), mp 175-177 °C.

<sup>1</sup>H NMR (400 MHz, Chloroform-*d*) δ 8.12 (d, *J* = 1.2 Hz, 1H), 8.01 (d, *J* = 8.0 Hz, 1H), 7.88 (d, *J* = 8.4 Hz, 1H), 7.75 (d, *J* = 7.6 Hz, 1H), 7.73-7.70 (m, 2H), 7.67-7.65 (m, 1H), 7.58-7.56 (m, 1H), 7.55-7.53 (m, 1H), 7.50 (d, *J* = 7.8 Hz, 1H), 7.42-7.37 (m, 2H); <sup>13</sup>C NMR (100 MHz, Chloroform-*d*) δ 155.7, 147.7, 141.5, 135.8, 133.2, 131.1, 129.0, 128.9, 127.6, 127.2, 126.7, 124.5, 124.4, 123.3, 119.5, 112.4, 109.2. HRMS calcd. for. C<sub>19</sub>H<sub>13</sub>N<sub>2</sub>S<sup>+</sup> (M+H)<sup>+</sup> 301.0794, found 301.0799.

#### Quinoline (**6a**, CAS: 91-22-5)<sup>[7]</sup>

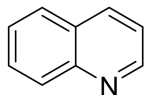

The reaction was conducted with 1,2,3,4-tetrahydroquinoline (**3a**, 26.8 μL, 0.2 mmol), I<sub>2</sub> (20 mol%, 10.2 mg). The residue was purified by column chromatography on silica gel (petroleum ether/EtOAc = 20 :1) to yield the desired product **6a** as colourless liquid (17.2 mg, 67% yield).

<sup>1</sup>H NMR (400 MHz, Chloroform-*d*) δ 8.93-8.92 (m, 1H), 8.14 (q, *J* = 8.0 Hz, 2H), 7.82 (d, *J* = 4.2 Hz, 1 H), 7.74-7.70 (m, 1H), 7.55 (t, *J* = 7.6 Hz, 1H), 7.40 (q, *J* = 4.1 Hz, 1H); <sup>13</sup>C NMR (100 MHz, Chloroform-*d*) δ 150.4, 148.3, 136.0, 129.5, 129.5, 128.3, 127.8, 126.6, 121.1.

#### 2-Methylquinoline (**6b**, CAS: 91-62-4)<sup>[7]</sup>

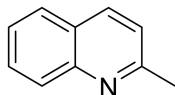

The reaction was conducted with 2-methyl-1,2,3,4-tetrahydroquinoline (**3b**, 29.4 mg, 0.2 mmol), I<sub>2</sub> (20 mol%, 10.2 mg). The residue was purified by column chromatography on silica gel (petroleum ether/EtOAc = 20:1) to yield the desired product **6b** as colourless oil (20.3 mg, 71%

yield).

$^1\text{H}$  NMR (400 MHz, Chloroform-*d*)  $\delta$  8.04 (t,  $J$  = 8.4 Hz, 2H), 7.77 (d,  $J$  = 8.0 Hz, 1H), 7.70-7.66 (m, 1H), 7.48 (t,  $J$  = 7.4 Hz, 1H), 7.29 (d,  $J$  = 8.4 Hz, 1H), 2.75 (s, 3H);  $^{13}\text{C}$  NMR (100 MHz, Chloroform-*d*)  $\delta$  158.9, 147.7, 136.1, 129.3, 128.5, 127.4, 126.4, 125.6, 121.9, 25.3.

### 3-Methylquinoline (6c, CAS: 612-58-8)<sup>[7]</sup>

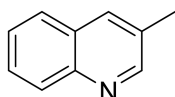

The reaction was conducted with 3-methyl-1,2,3,4-tetrahydroquinoline (**3c**, 29.4 mg, 0.2 mmol),  $\text{I}_2$  (20 mol%, 10.2 mg). The residue was purified by column chromatography on silica gel (petroleum ether/EtOAc = 20:1) to yield the desired product **6c** as pale colourless oil (19.7 mg, 69% yield).

$^1\text{H}$  NMR (400 MHz, Chloroform-*d*)  $\delta$  8.76 (d,  $J$  = 2.0 Hz, 1H), 8.07 (d,  $J$  = 8.4 Hz, 1H), 7.91 (s, 1H), 7.73 (d,  $J$  = 8.0 Hz, 1H), 7.66-7.62 (m, 1H), 7.53-7.49 (m, 1H), 2.51 (s, 3H);  $^{13}\text{C}$  NMR (100 MHz, Chloroform-*d*)  $\delta$  152.2, 146.3, 134.5, 130.3, 128.9, 128.3, 127.9, 127.0, 126.4, 18.5.

### 4-Methylquinoline (6d, CAS: 491-35-0)<sup>[7]</sup>

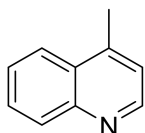

The reaction was conducted with 4-methyl-1,2,3,4-tetrahydroquinoline (**3d**, 29.4 mg, 0.2 mmol),  $\text{I}_2$  (20 mol%, 10.2 mg). The residue was purified by column chromatography on silica gel (petroleum ether/EtOAc = 20:1) to yield the desired product **6d** as colourless oil (20.3 mg, 71% yield).

$^1\text{H}$  NMR (400 MHz, Chloroform-*d*)  $\delta$  8.77 (d,  $J$  = 4.0 Hz, 1H), 8.11 (d,  $J$  = 8.4 Hz, 1H), 7.97 (d,  $J$  = 8.4 Hz, 1H), 7.70 (t,  $J$  = 7.6 Hz, 1H), 7.55 (t,  $J$  = 7.6 Hz, 1H), 7.20 (d,  $J$  = 4.0 Hz, 1H), 2.68 (s, 3H);  $^{13}\text{C}$  NMR (100 MHz, Chloroform-*d*)  $\delta$  150.1, 147.9, 144.2, 129.8, 129.0, 128.2, 126.2, 123.7, 121.8, 18.6.

### 8-Methylquinoline (6e, CAS: 611-32-5)<sup>[7]</sup>

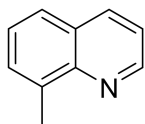

The reaction was conducted with 8-methyl-1,2,3,4-tetrahydroquinoline (**3e**, 29.4 mg, 0.2 mmol), I<sub>2</sub> (20 mol%, 10.2 mg). The residue was purified by column chromatography on silica gel (petroleum ether/EtOAc = 20:1) to yield the desired product **6e** as pale yellow liquid (21.1 mg, 74% yield).

<sup>1</sup>H NMR (400 MHz, Chloroform-*d*)  $\delta$  8.93 (d, *J* = 2.8 Hz, 1H), 8.09 (d, *J* = 8.0 Hz 1H), 7.63 (d, *J* = 8.0 Hz, 1H), 7.54 (d, *J* = 6.8 Hz, 1H), 7.42-7.34 (m, 2H), 2.82 (s, 3H); <sup>13</sup>C NMR (100 MHz, Chloroform-*d*)  $\delta$  149.1, 147.2, 137.0, 136.2, 129.5, 128.2, 126.2, 125.8, 120.7, 18.1.

#### Methyl quinoline-6-carboxylate (**6f**, CAS: 6931-19-7)<sup>[7]</sup>

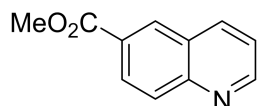

The reaction was conducted with methyl 1,2,3,4-tetrahydroquinoline-6-carboxylate (**3f**, 38.2 mg, 0.2 mmol), I<sub>2</sub> (20 mol%, 10.2 mg). The residue was purified by column chromatography on silica gel (petroleum ether/EtOAc = 10:1) to yield the desired product **6f** as pale yellow liquid (27.3 mg, 73% yield), mp 141-143 °C.

<sup>1</sup>H NMR (400 MHz, Chloroform-*d*)  $\delta$  9.01 (d, *J* = 4.0 Hz, 1H), 8.60 (s, 1H), 8.32-8.26 (m, 2H), 8.15 (d, *J* = 8.8 Hz, 1H), 7.48 (q, *J* = 4.3 Hz, 1H), 4.00 (s, 3H); <sup>13</sup>C NMR (100 MHz, Chloroform-*d*)  $\delta$  166.6, 152.5, 150.0, 137.3, 131.0, 129.8, 128.9, 128.1, 127.4, 121.8, 52.4.

#### 7-Nitroquinoline (**6g**, CAS: 91-22-5)<sup>[8]</sup>

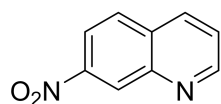

The reaction was conducted with 7-nitro-1,2,3,4-tetrahydroquinoline (**3g**, 35.6 mg, 0.2 mmol), I<sub>2</sub> (20 mol%, 10.2 mg). The residue was purified by column chromatography on silica gel (petroleum ether/EtOAc = 10:1) to yield the desired product **6g** as pale yellow solid (25.7 mg, 74% yield), mp 127-129 °C.

<sup>1</sup>H NMR (400 MHz, Chloroform-*d*)  $\delta$  9.10 (d, *J* = 3.6 Hz, 1H), 9.01 (s, 1H), 8.35-8.32 (m, 1H), 8.29 (d, *J* = 8.0 Hz, 1H), 8.00 (d, *J* = 8.8 Hz, 1H), 7.61 (q, *J* = 4.1 Hz, 1H); <sup>13</sup>C NMR (100 MHz,

Chloroform-*d*)  $\delta$  152.7, 148.0, 147.1, 136.0, 131.3, 129.5, 125.8, 123.9, 120.1.

**8-Nitroquinoline (6h, CAS: 607-35-2)**<sup>[9]</sup>

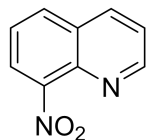

The reaction was conducted with 8-nitro-1,2,3,4-tetrahydroquinoline (**3h**, 35.6 mg, 0.2 mmol), I<sub>2</sub> (20 mol%, 10.2 mg). The residue was purified by column chromatography on silica gel (petroleum ether/EtOAc = 10:1) to yield the desired product **6h** as pale yellow solid (26.8 mg, 77% yield), mp 89-91 °C .

<sup>1</sup>H NMR (400 MHz, Chloroform-*d*)  $\delta$  9.08 (d, *J* = 4.4 Hz, 1H), 8.28 (d, *J* = 8.4 Hz, 1H), 8.06 (d, *J* = 8.0 Hz, 2H), 7.64 (t, *J* = 7.8 Hz, 1H), 7.60 (q, *J* = 4.1 Hz 1H); <sup>13</sup>C NMR (100 MHz, Chloroform-*d*)  $\delta$  152.6, 139.5, 136.1, 132.0, 129.0, 125.3, 123.8, 122.8.

**Isoquinoline (6i, CAS: 119-65-3)**<sup>[9]</sup>

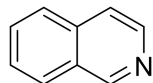

The reaction was conducted with 1,2,3,4-tetrahydroisoquinoline (**3i**, 26.8 mg, 0.2 mmol), I<sub>2</sub> (20 mol%, 10.2 mg). The residue was purified by column chromatography on silica gel (petroleum ether/EtOAc = 10:1) to yield the desired product **6i** as colourless liquid (17.3 mg, 67% yield).

<sup>1</sup>H NMR (400 MHz, Chloroform-*d*)  $\delta$  9.26 (s, 1H), 8.53 (d, *J* = 6.0 Hz, 1H), 7.96 (d, *J* = 8.0 Hz, 1H), 7.82 (d, *J* = 8.0 Hz, 1H), 7.71-7.58 (m, 3H); <sup>13</sup>C NMR (100 MHz, Chloroform-*d*)  $\delta$  152.4, 142.9, 135.7, 130.2, 128.6, 127.5, 127.1, 126.4, 120.4.

**1-Methylisoquinoline (6j, CAS: 1721-93-3)**<sup>[9]</sup>

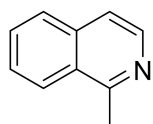

The reaction was conducted with 1-methyl-1,2,3,4-tetrahydroisoquinoline (**3j**, 29.4 mg, 0.2 mmol), I<sub>2</sub> (20 mol%, 10.2 mg). The residue was purified by column chromatography on silica gel

(petroleum ether/EtOAc = 10:1) to yield the desired product **6j** as pale yellow liquid (21.7 mg, 76% yield).

<sup>1</sup>H NMR (400 MHz, Chloroform-*d*)  $\delta$  8.39 (d, *J* = 5.6 Hz, 1H), 8.10 (d, *J* = 8.4 Hz, 1H), 7.79 (d, *J* = 8.0 Hz, 1H), 7.68-7.64 (m, 1H), 7.58-7.50 (m, 1H), 7.49 (d, *J* = 5.6 Hz, 1H), 2.96 (s, 3H); <sup>13</sup>C NMR (100 MHz, Chloroform-*d*)  $\delta$  149.1, 147.2, 137.0, 136.2, 129.5, 128.2, 126.2, 125.8, 120.7, 18.1.

### 1-Phenylisoquinoline (**6k**, CAS: 3297-72-1)<sup>[9]</sup>

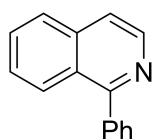

The reaction was conducted with 1-phenyl-1,2,3,4-tetrahydroisoquinoline (**3k**, 41.8 mg, 0.2 mmol), I<sub>2</sub> (20 mol%, 10.2 mg). The residue was purified by column chromatography on silica gel (petroleum ether/EtOAc = 10:1) to yield the desired product **6k** as white solid (35.7 mg, 87% yield), mp 94-95 °C .

<sup>1</sup>H NMR (400 MHz, Chloroform-*d*)  $\delta$  8.61 (d, *J* = 5.6 Hz, 1H), 8.11 (d, *J* = 8.4 Hz, 1H), 7.89 (d, *J* = 8.4 Hz, 1H), 7.72-7.64 (m, 4H), 7.56-7.50 (m, 4H); <sup>13</sup>C NMR (100 MHz, Chloroform-*d*)  $\delta$  160.7, 142.1, 139.4, 136.8, 130.0, 129.9, 128.6, 128.3, 127.6, 127.2, 126.9, 126.6, 120.0.

### Benzo[*h*]quinoline (**6l**, CAS: 85-02-9)<sup>[10]</sup>

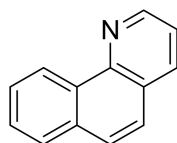

The reaction was conducted with 1,2,3,4-tetrahydrobenzo[*h*]quinoline (**3l**, 36.6 mg, 0.2 mmol), I<sub>2</sub> (20 mol%, 10.2 mg). The residue was purified by column chromatography on silica gel (petroleum ether/EtOAc = 10:1) to yield the desired product **6l** as pale yellow solid (25.4 mg, 71% yield), mp 211-213 °C.

<sup>1</sup>H NMR (400 MHz, Chloroform-*d*)  $\delta$  9.31-9.29 (m, 1H), 9.00 (q, *J* = 2.1 Hz, 1H), 8.18-8.15 (m, 1H), 7.92-7.89 (m, 1H), 7.81 (d, *J* = 8.8 Hz, 1H), 7.77-7.66 (m, 3H), 7.53-7.50 (m, 1H); <sup>13</sup>C NMR (100 MHz, Chloroform-*d*)  $\delta$  148.8, 146.5, 135.8, 133.6, 131.5, 128.2, 127.8, 127.7, 127.1, 126.4,



125.3, 124.3, 121.8.

#### 4-Phenylpyridine (**6m**, CAS: 939-23-1)<sup>[11]</sup>

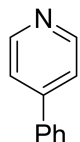

The reaction was conducted with 4-phenylpiperidine (**3m**, 31.8 mg, 0.2 mmol), I<sub>2</sub> (20 mol%, 10.2 mg). The residue was purified by column chromatography on silica gel (petroleum ether/EtOAc = 5:1) to yield the desired product **6m** as pale yellow solid (17.3 mg, 56% yield), mp 76-78 °C.

<sup>1</sup>H NMR (400 MHz, Chloroform-*d*)  $\delta$  8.95 (d, *J* = 6.4 Hz, 1H), 8.09 (d, *J* = 2.0 Hz, 2H), 7.67 (d, *J* = 6.8 Hz, 1H), 7.61-7.58 (m, 1H), 7.50-7.48 (m, 1H), 7.41-7.39 (m, 3H); <sup>13</sup>C NMR (100 MHz, Chloroform-*d*)  $\delta$  152.3, 145.0, 136.1, 133.6, 130.4, 129.5, 127.5, 127.2, 122.8.

#### 2-Phenylpyridine (**6n**, CAS: 1008-89-5)<sup>[11]</sup>

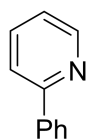

The reaction was conducted with 2-phenylpiperidine (**3n**, 31.8 mg, 0.2 mmol), I<sub>2</sub> (20 mol%, 10.2 mg). The residue was purified by column chromatography on silica gel (petroleum ether/EtOAc = 5:1) to yield the desired product **6n** as pale white solid (17.0 mg, 55% yield), mp 147-149 °C.

<sup>1</sup>H NMR (400 MHz, Chloroform-*d*)  $\delta$  8.68 (d, *J* = 4.8 Hz, 1H), 7.98 (d, *J* = 7.2 Hz, 2H), 7.74-7.69 (m, 2H), 7.49-7.38 (m, 3H), 7.21-7.18 (m, 1H); <sup>13</sup>C NMR (100 MHz, Chloroform-*d*)  $\delta$  157.4, 149.6, 139.3, 136.7, 128.9, 128.7, 126.8, 122.0, 120.5.

#### 1-(5-Nitro-1*H*-indol-1-yl)ethan-1-one (**6o**, CAS: 576-15-8)<sup>[12]</sup>

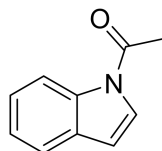

The reaction was conducted with 1-(indolin-1-yl)ethan-1-one (**3o**, 21.6 mg, 0.2 mmol), I<sub>2</sub> (20 mol%, 10.2 mg). The residue was purified by column chromatography on silica gel (petroleum ether/EtOAc = 10:1) to yield the desired product **6o** as pale white solid (20.3 mg, 64% yield), mp

99-101 °C.

<sup>1</sup>H NMR (400 MHz, Chloroform-*d*)  $\delta$  8.44 (d, *J* = 8.4 Hz, 1H), 7.56 (d, *J* = 8.0 Hz, 1H), 7.42 (d, *J* = 4.0 Hz, 1H), 7.36 (t, *J* = 8.2 Hz, 1H), 7.30-7.26 (m, 1H), 6.64 (d, *J* = 3.6 Hz, 1H), 2.64 (s, 3H);

<sup>13</sup>C NMR (100 MHz, Chloroform-*d*)  $\delta$  168.6, 135.5, 130.4, 125.2, 125.1, 123.6, 120.8, 116.5, 109.2, 24.0.

**5-Nitro-1*H*-indole (6p, CAS: 6146-52-7)<sup>[13]</sup>**

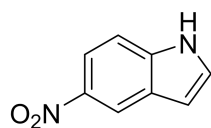

The reaction was conducted with 5-nitroindoline (**3p**, 33.2 mg, 0.2 mmol), I<sub>2</sub> (20 mol%, 10.2 mg).

The residue was purified by column chromatography on silica gel (petroleum ether/dichloromethane = 1:1) to yield the desired product **3p** as pale white solid (18.5 mg, 57% yield), mp 142-144 °C.

<sup>1</sup>H NMR (400 MHz, Chloroform-*d*)  $\delta$  8.82 (s, 1H), 8.61 (d, *J* = 2.0 Hz, 1H), 8.13-8.10 (m, 1H), 7.46 (d, *J* = 9.2 Hz, 1H), 7.41-7.39 (m, 1H), 6.74-6.73 (m, 1H); <sup>13</sup>C NMR (100 MHz, Chloroform-*d*)  $\delta$  141.8, 138.9, 127.5, 127.2, 118.0, 117.6, 111.1, 105.0.

#### 4. References

- (1) Yang, Z.; Hu, R. H.; Li, X. T.; Wang, X.; Gu, R.; Han, S. Q. *Tetrahedron Lett.* **2017**, *58*, 2366-2369.
- (2) Canivet, J.; Yamaguchi, J.; Ban, I.; Itami, K. *Org. Lett.* **2009**, *11*, 1733-1736.
- (3) Zhang, J.; Zhao, X.; Liu, P.; Sun, P. P. *J. Org. Chem.* **2019**, *84*, 12596-12605.
- (4) Heo, Y.; Song, Y. S.; Kim, B. T. Heo, J.-N. *Tetrahedron Lett.* **2006**, *47*, 3091-3094.
- (5) Sun, X.; Lv, X.-H.; Ye, L.-M.; Hu, Y.; Chen, Y.-Y.; Zhang, X.-J.; Yan, M. *Org. Biomol. Chem.* **2015**, *13*, 7381-7383.
- (6) Gao, J. L.; Zhu, J. Y.; Chen, L. B.; Shao, Y. Y.; Zhu, J. Q.; Huang, Y. J.; Wang, X. X.; Lv, X. *Tetrahedron Lett.* **2014**, *55*, 3367-3373.
- (7) Yang, L.; Ma, F.-X.; Xu, F.; Li, D.; Su, L. M.; Xu, H.-C.; Wang, C. *Chem. Asian J.* **2019**, *14*, 3557-3560.
- (8) Sahoo, M. K.; Jaiswal, G.; Rana, J.; Balaraman, E. *Chem. A Eur. J.* **2017**, *23*, 14167- 14172.
- (9) Pedron, J.; Boudot, C.; Hutter, S.; Bourgeade-Delmas, S.; Stigliani, J.-L.; Sournia-Saquet, A.; Moreau, A.; Boutet-Robinet, E.; Paloque, L.; Mothes, E.; Laget, M.; Vendier, L.; Pratviel, G.; Wyllie, S.; Fairlamb, A.; Azas, N.; Courtioux, B.; Valentin, A.; Verhaeghe, P. *Eur. J. Med. Chem.* **2018**, *155*, 135-152.
- (10) Kojima, M.; Kanai, M. *Angew. Chem. Int. Ed.* **2016**, *55*, 12224-12227.
- (11) Wei, J.; Liang, H. M.; Ni, C. F.; Sheng, R.; Hu, J. B. *Org. Lett.* **2019**, *21*, 937-940.
- (12) Dissanayake, D. M. M. M.; Vannucci, A. K. *Org. Lett.* **2019**, *21*, 457-460.
- (13) Zhang, J. Y.; Chen, S. Y.; Chen, F. F.; Xu, W. S.; Deng, G.-J.; Gong, H. *Adv. Synth. Catal.* **2017**, *359*, 2358-2363.

## 5. $^1\text{H}$ NMR and $^{13}\text{C}$ NMR spectra of products

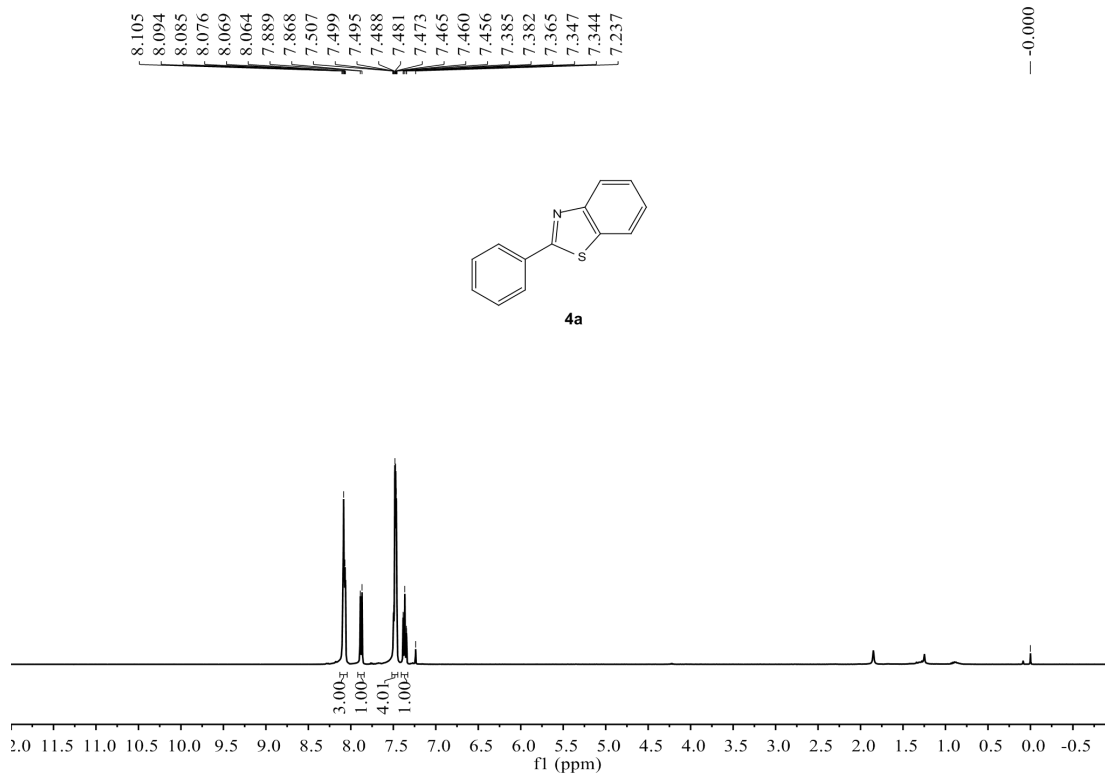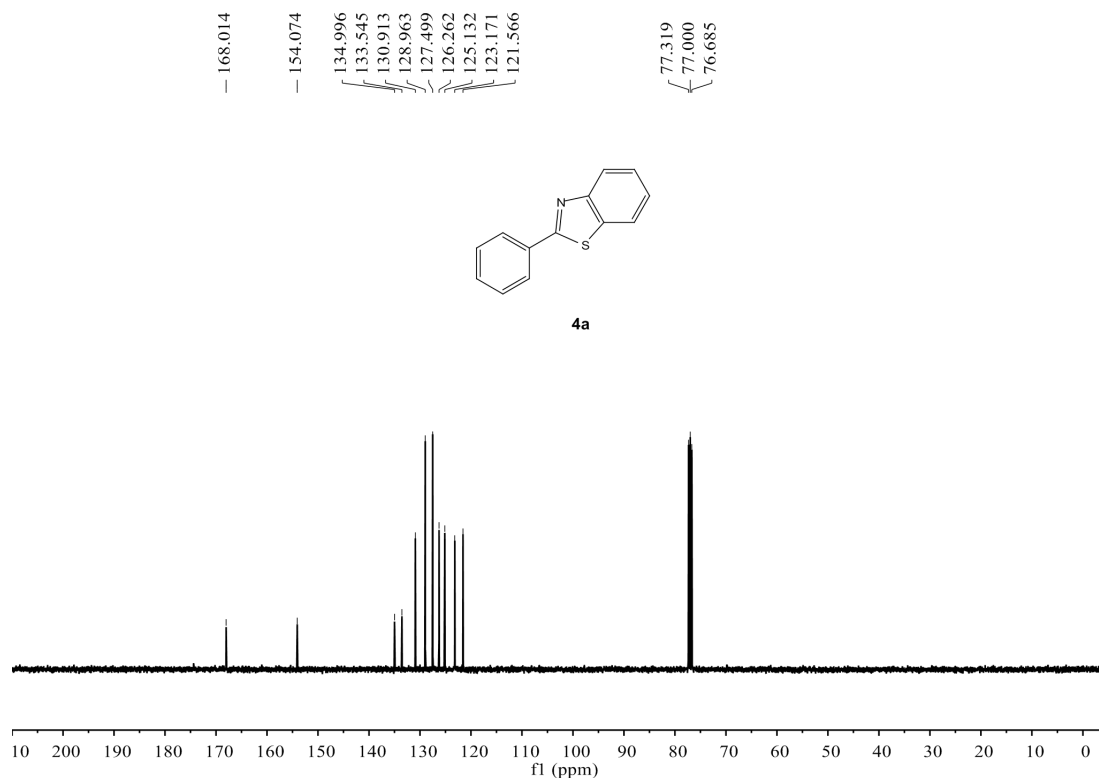

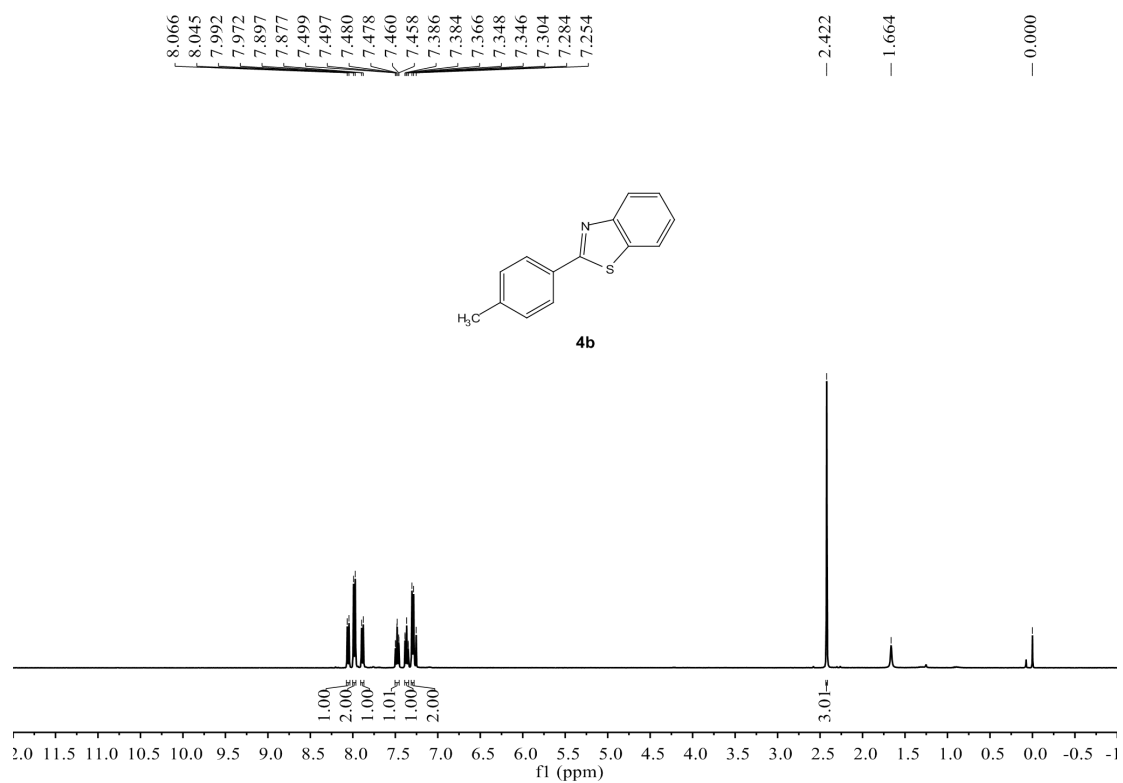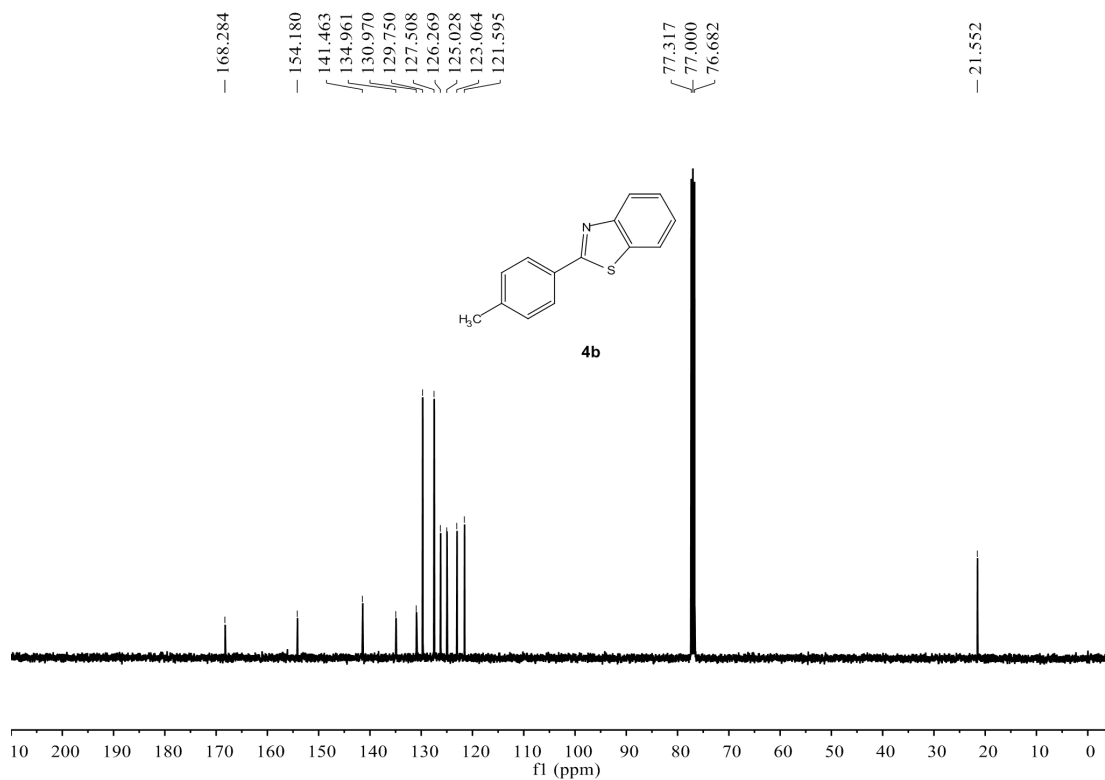

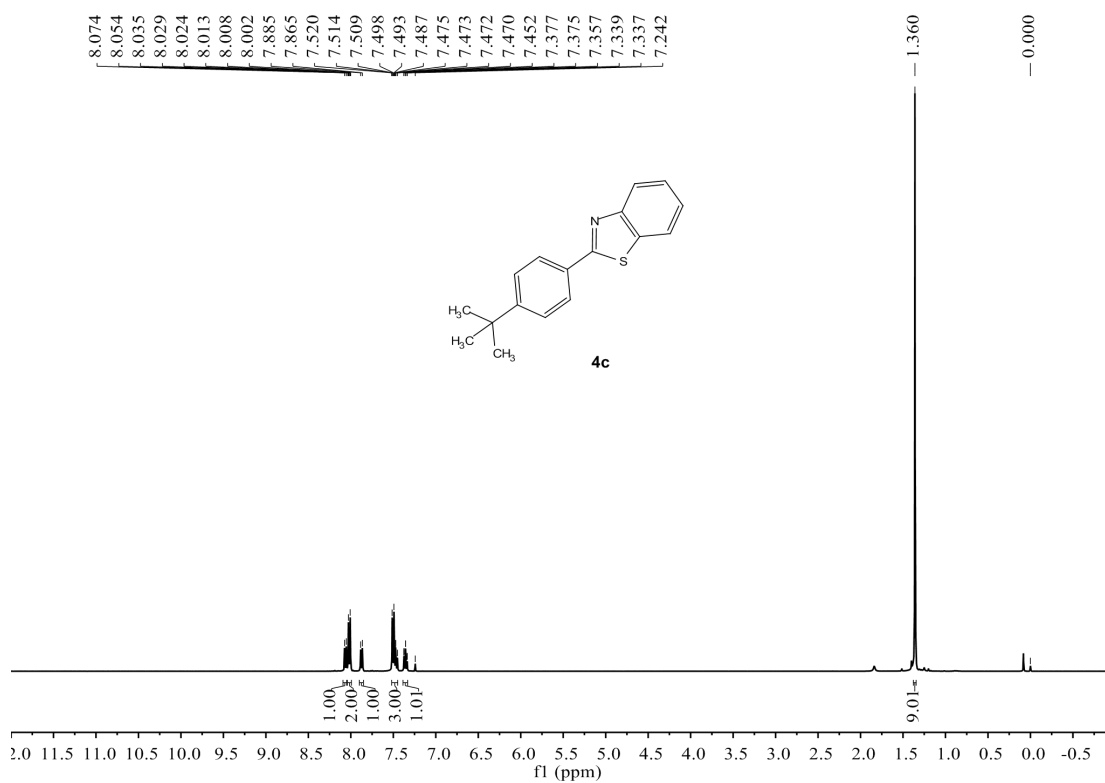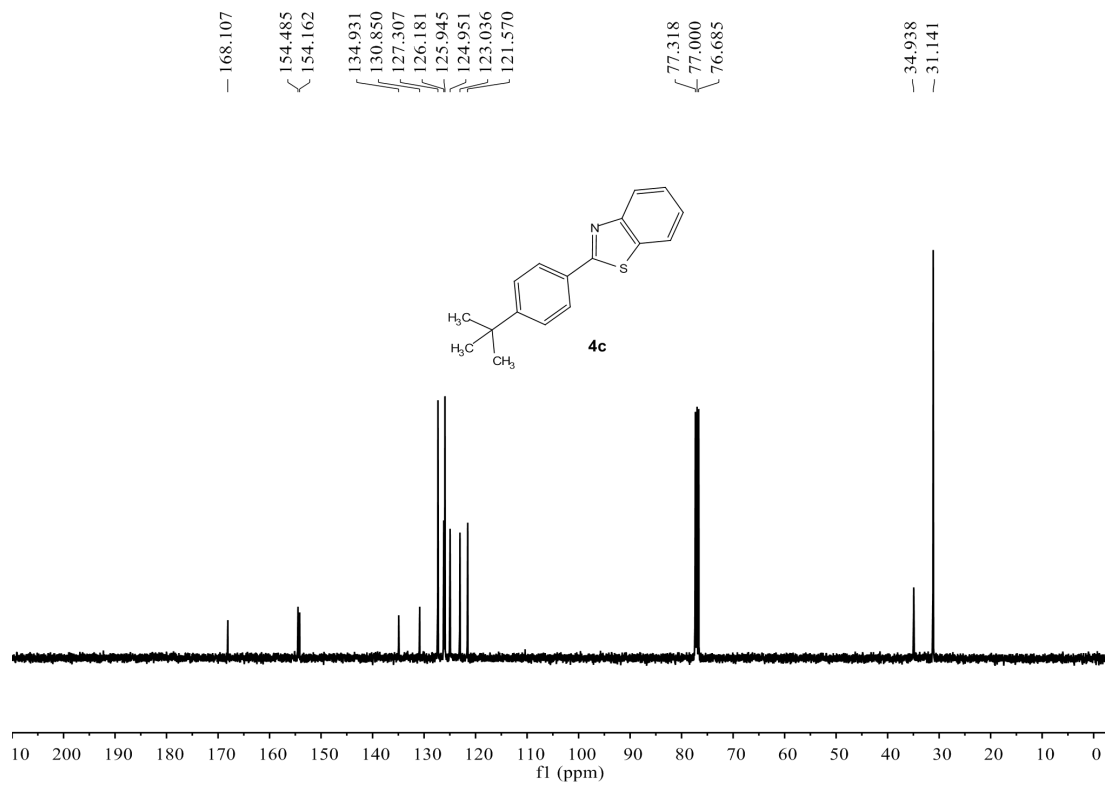

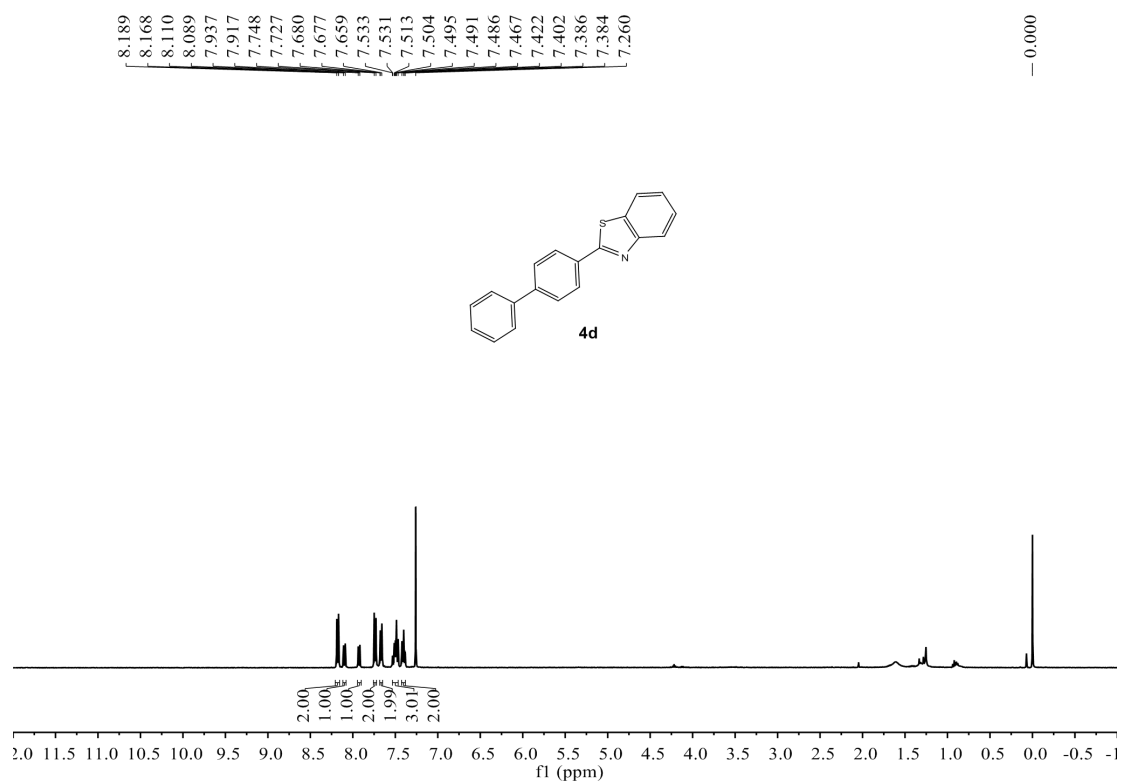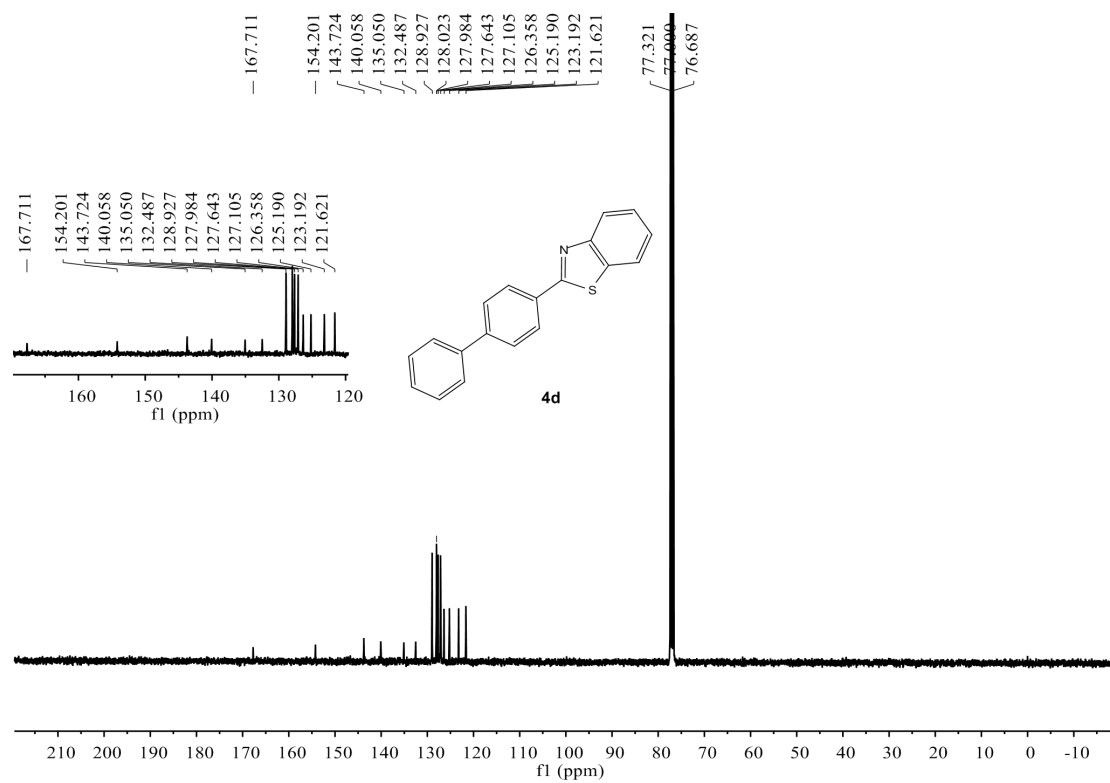

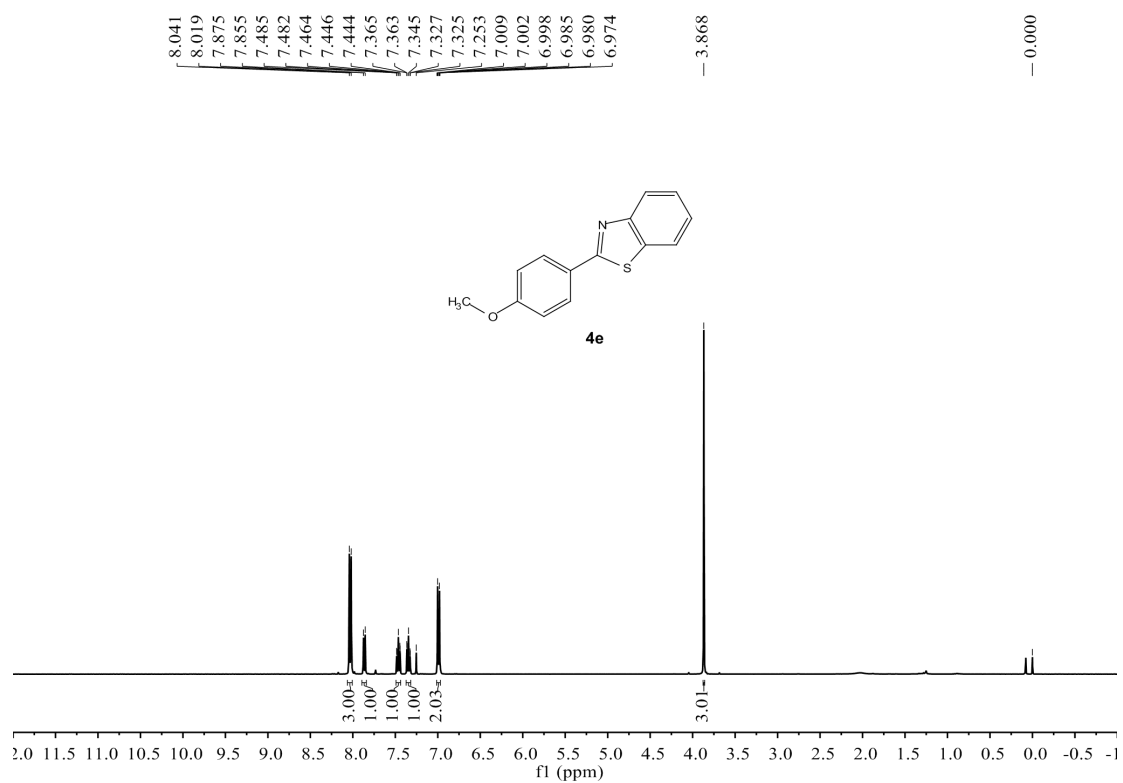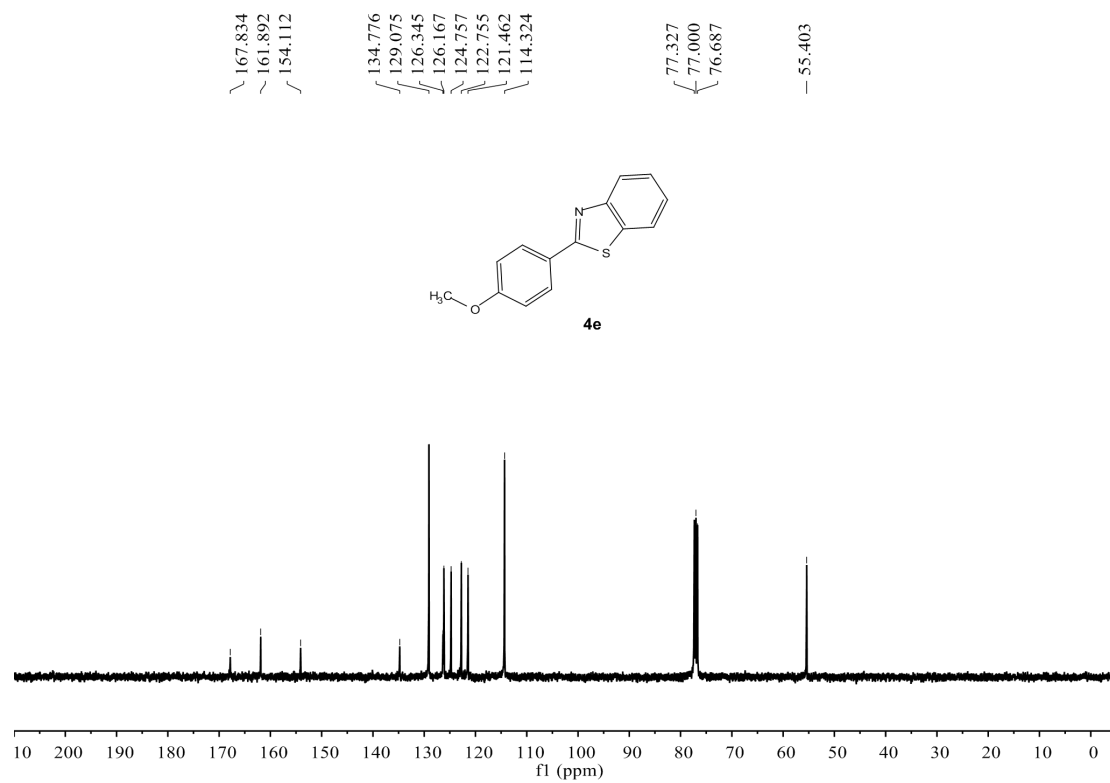



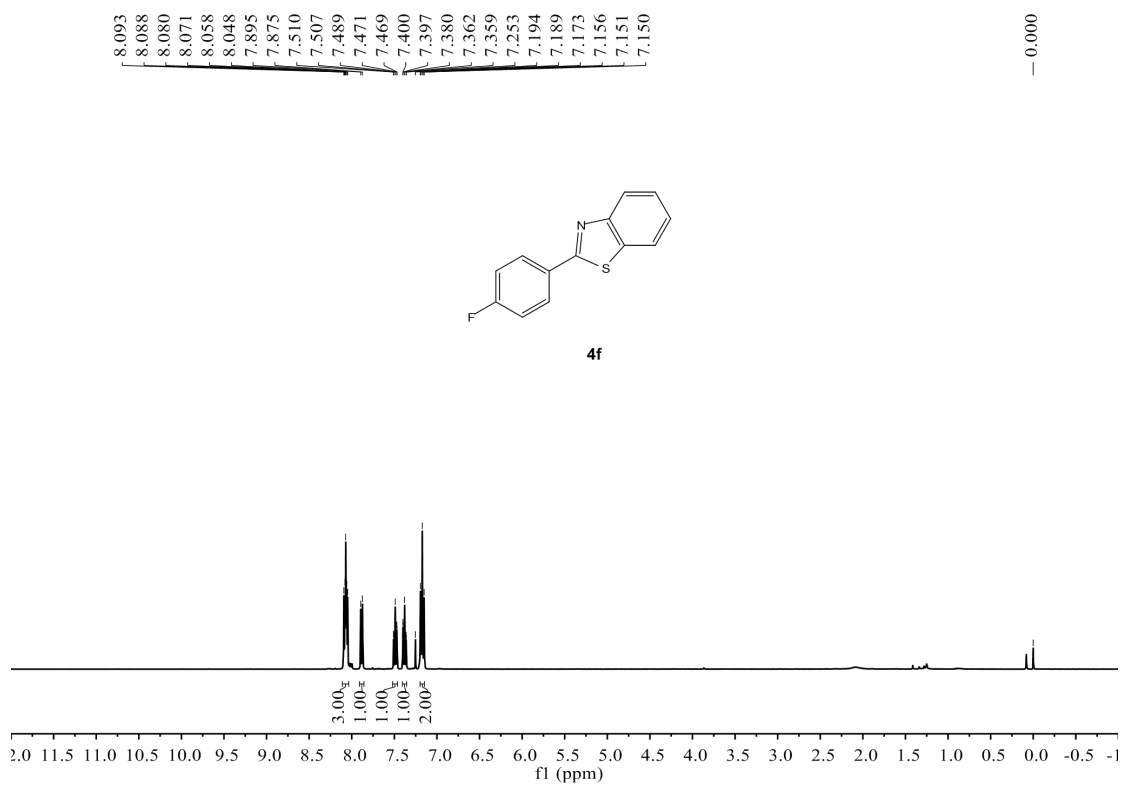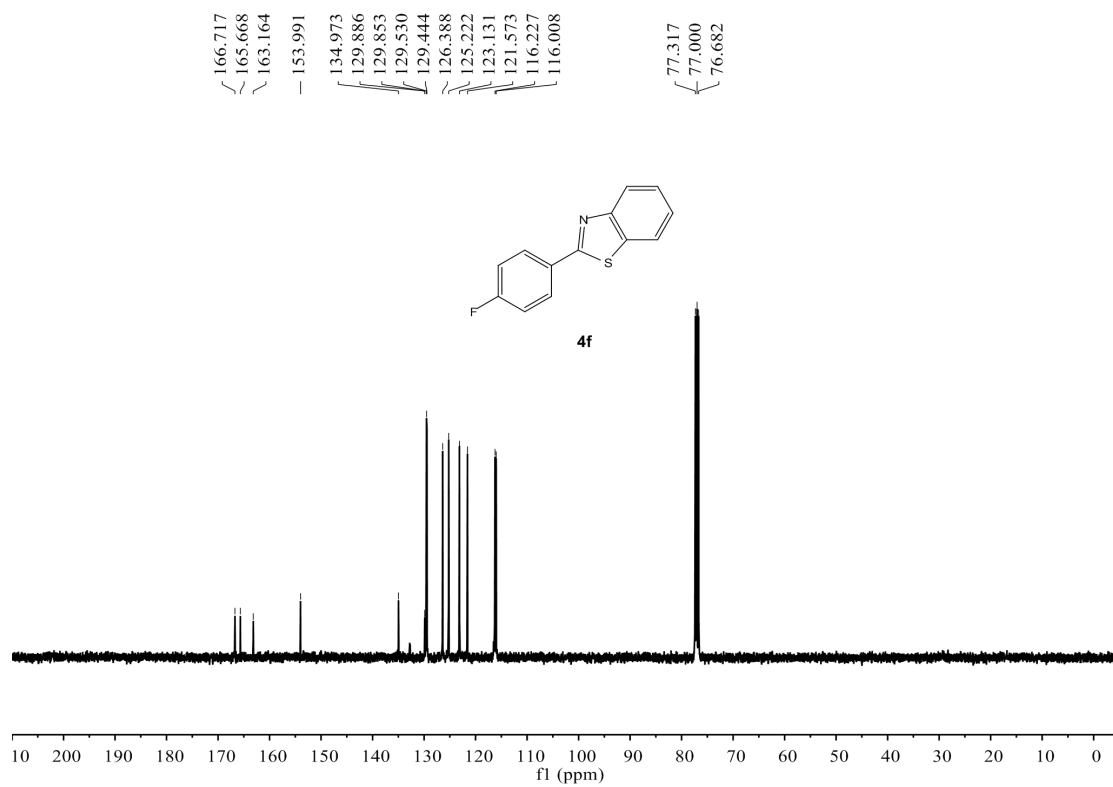

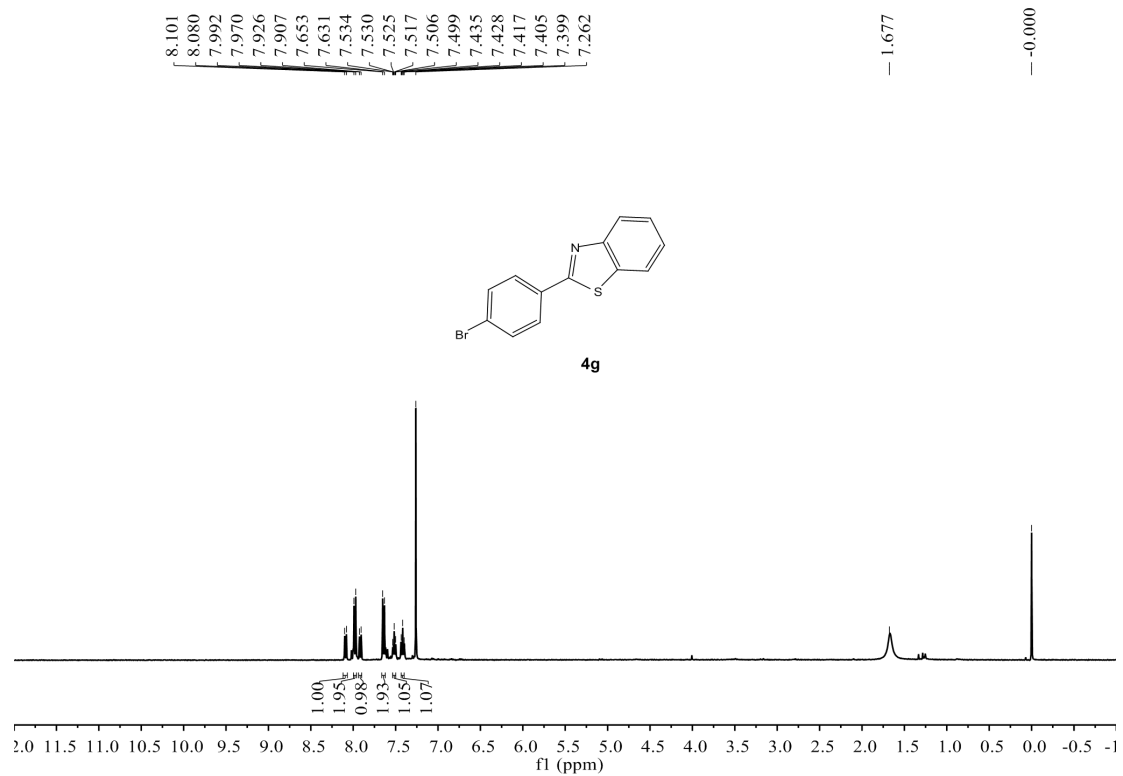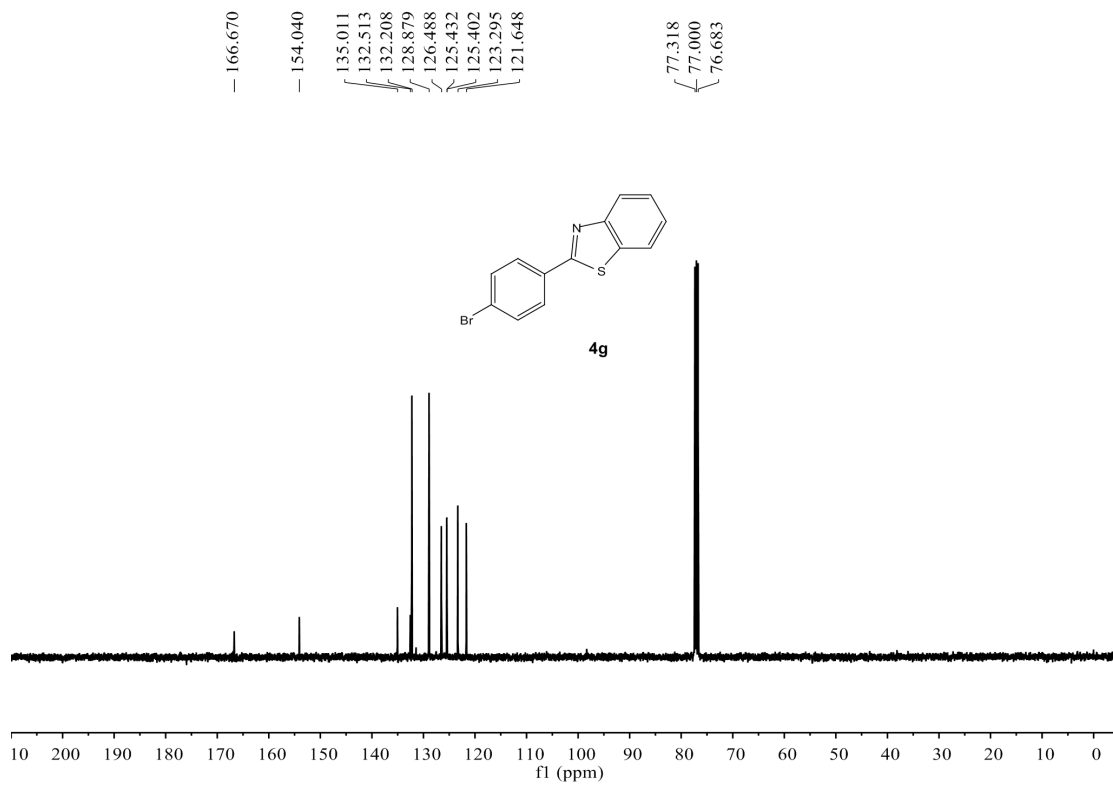

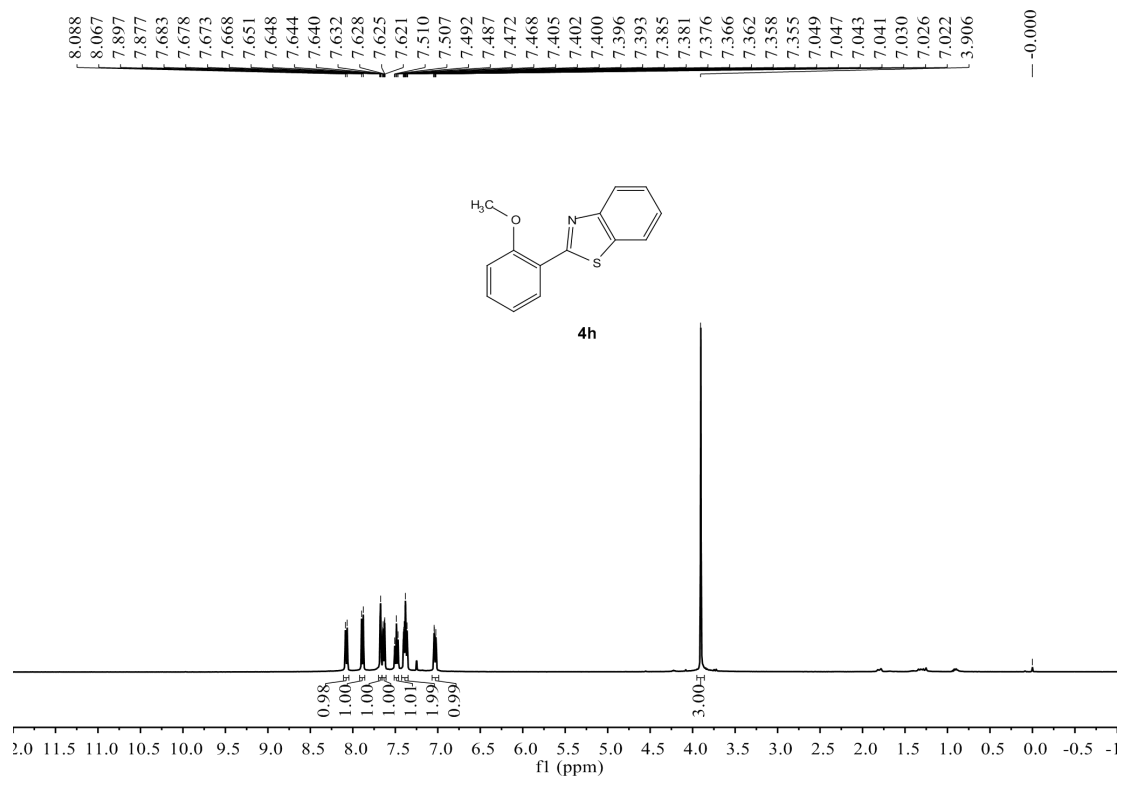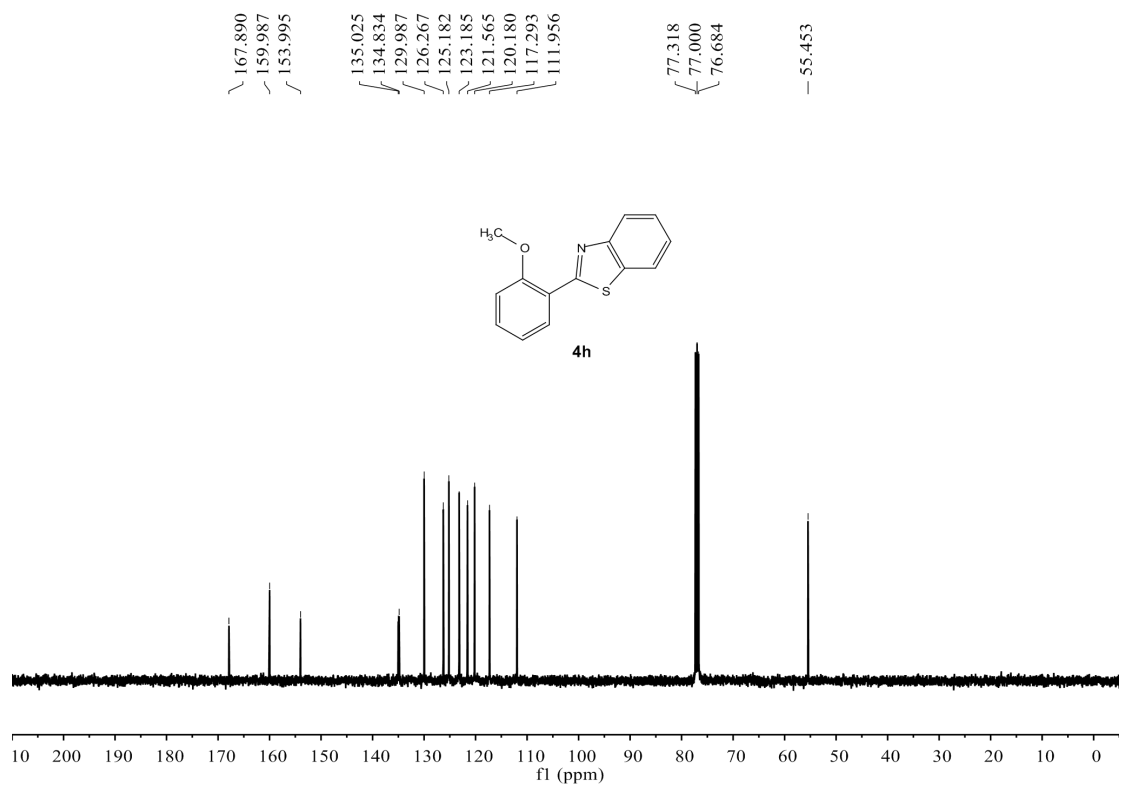

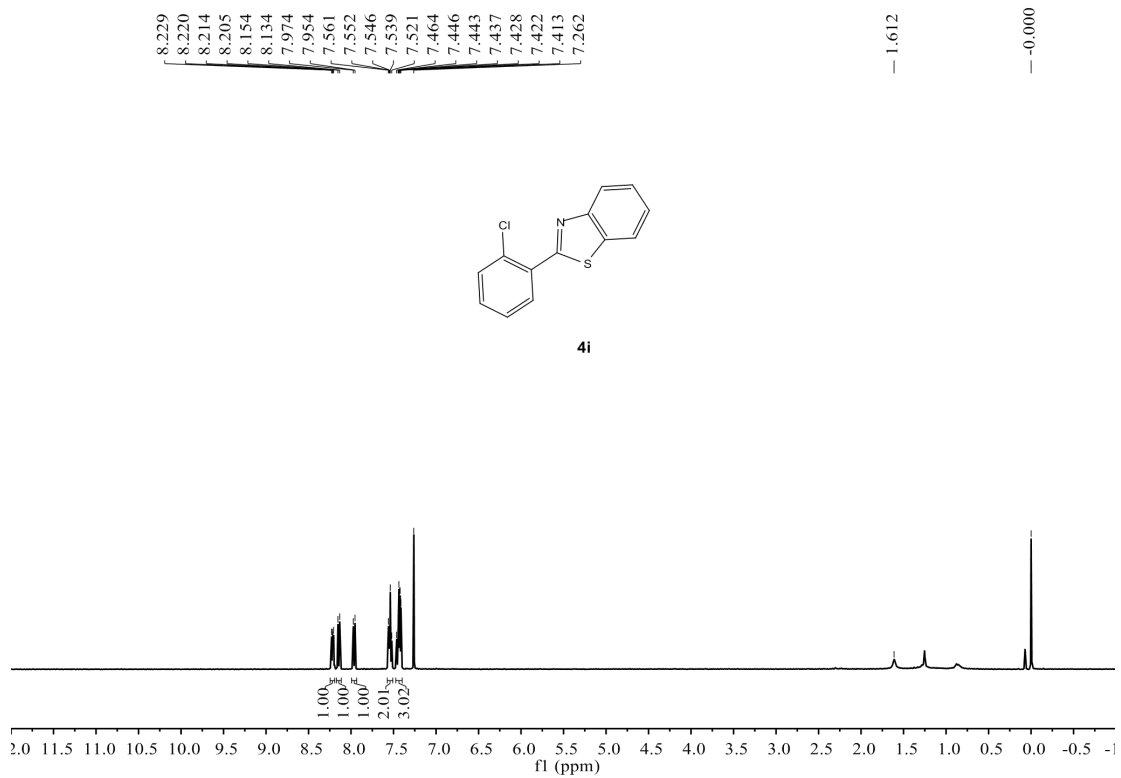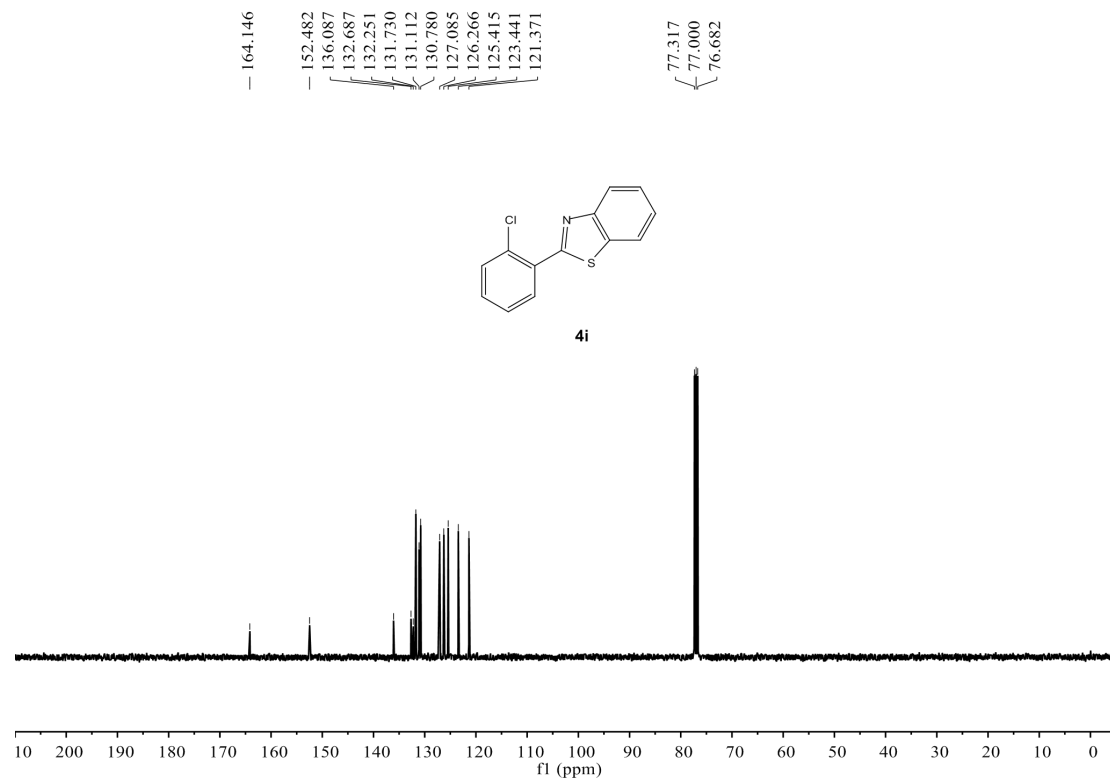

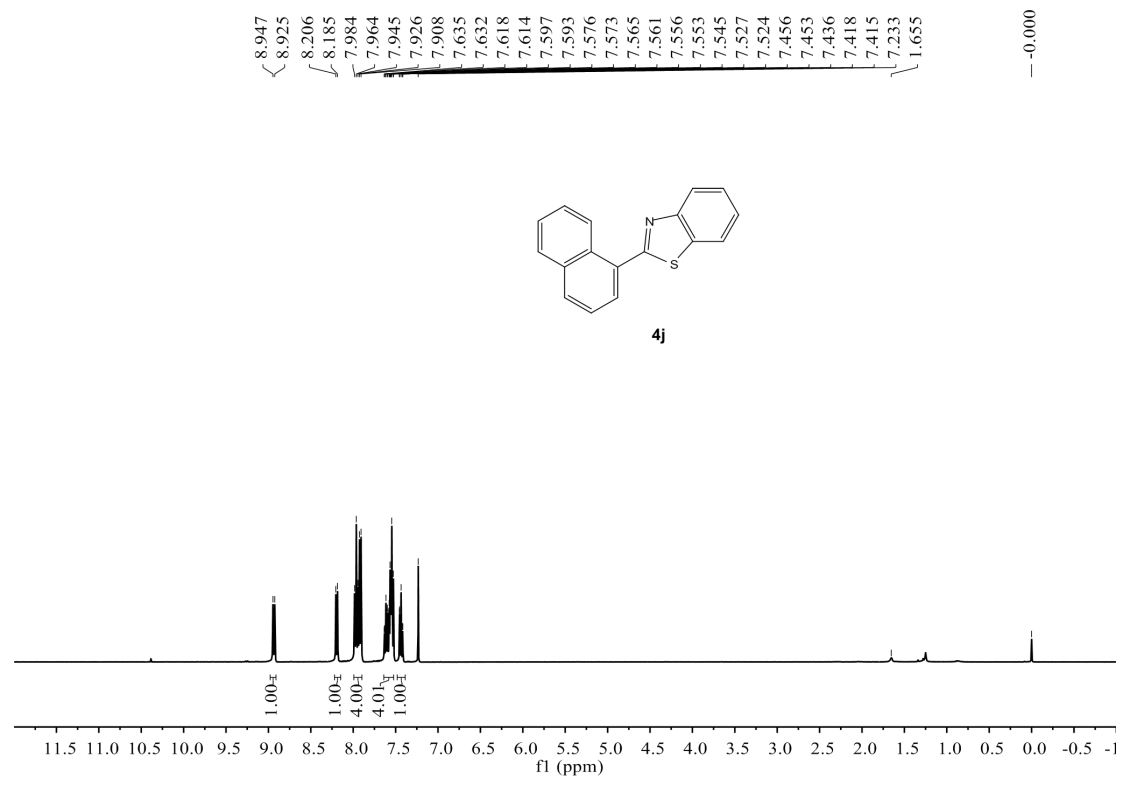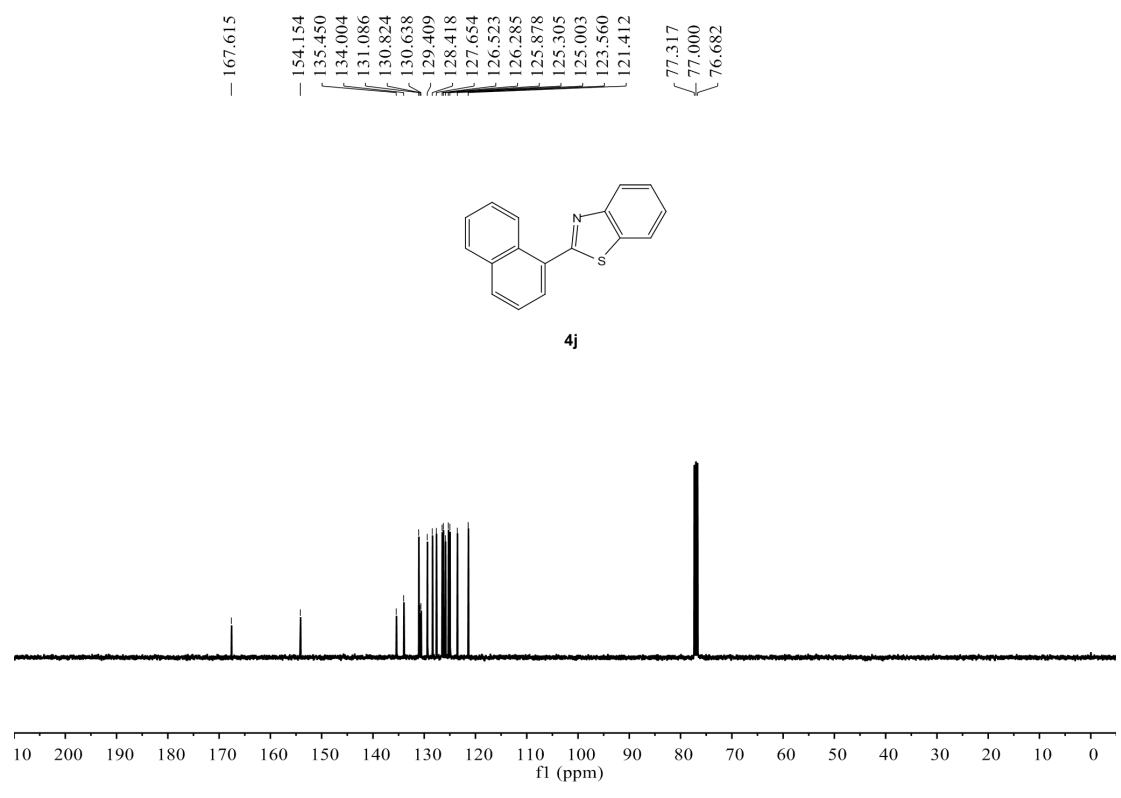

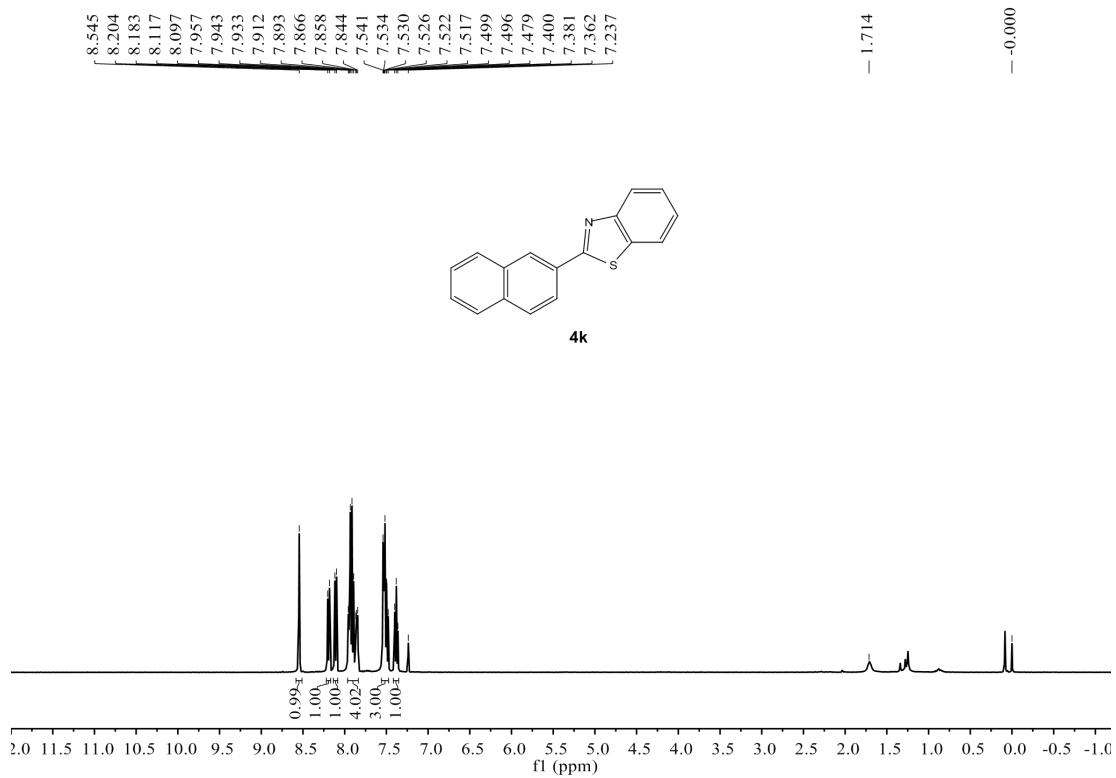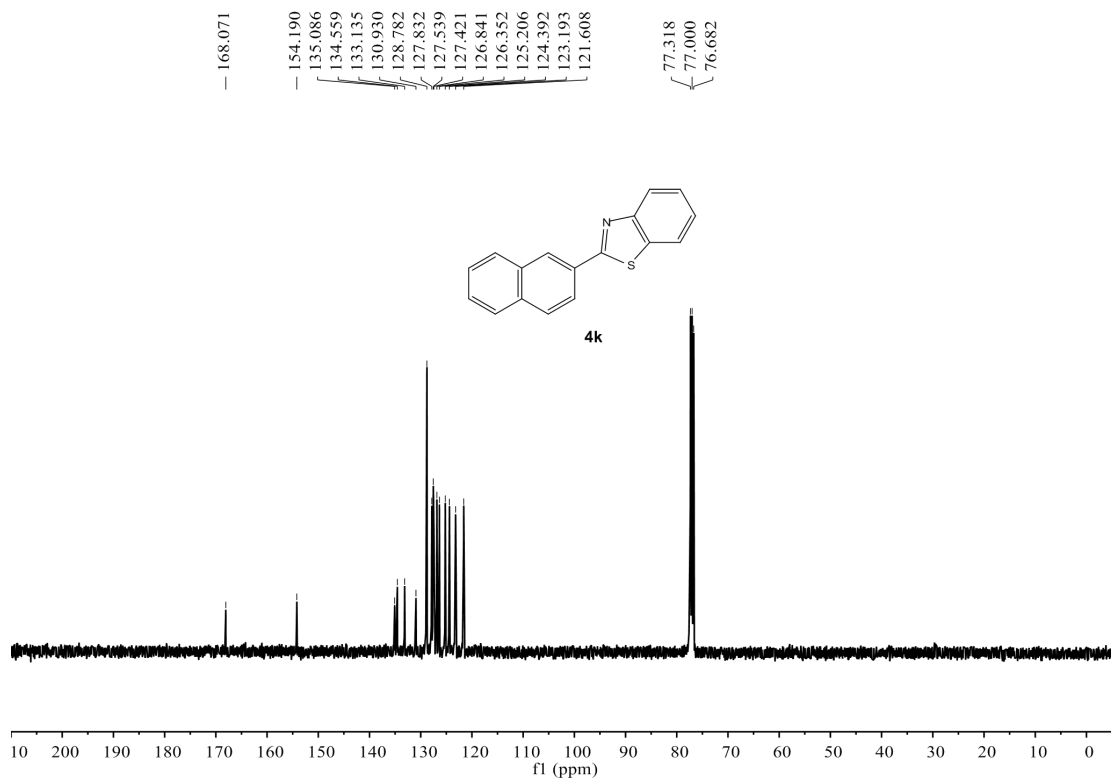

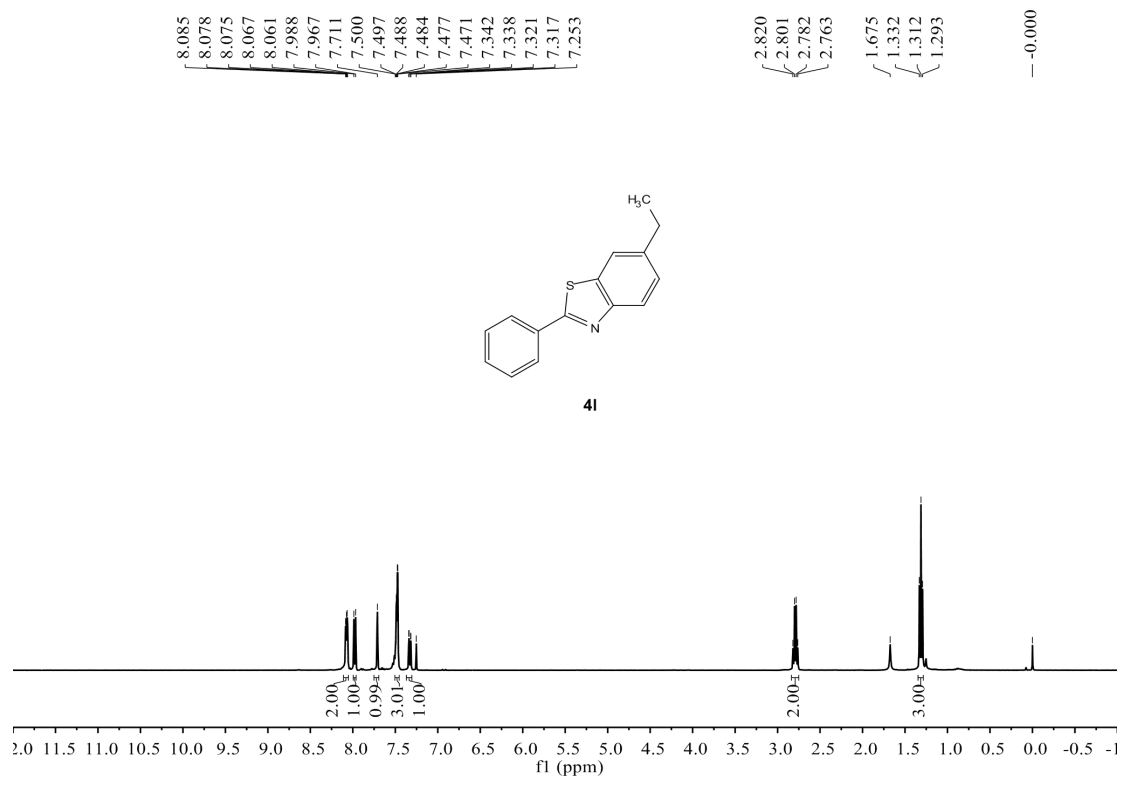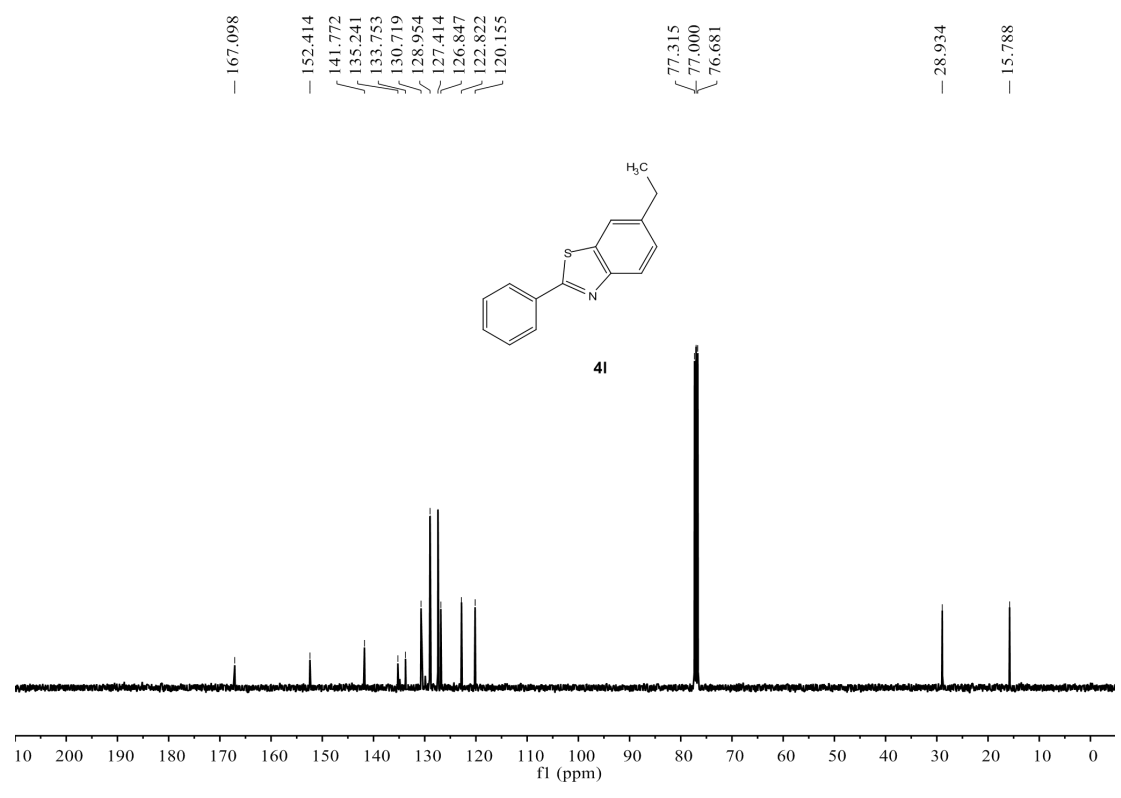

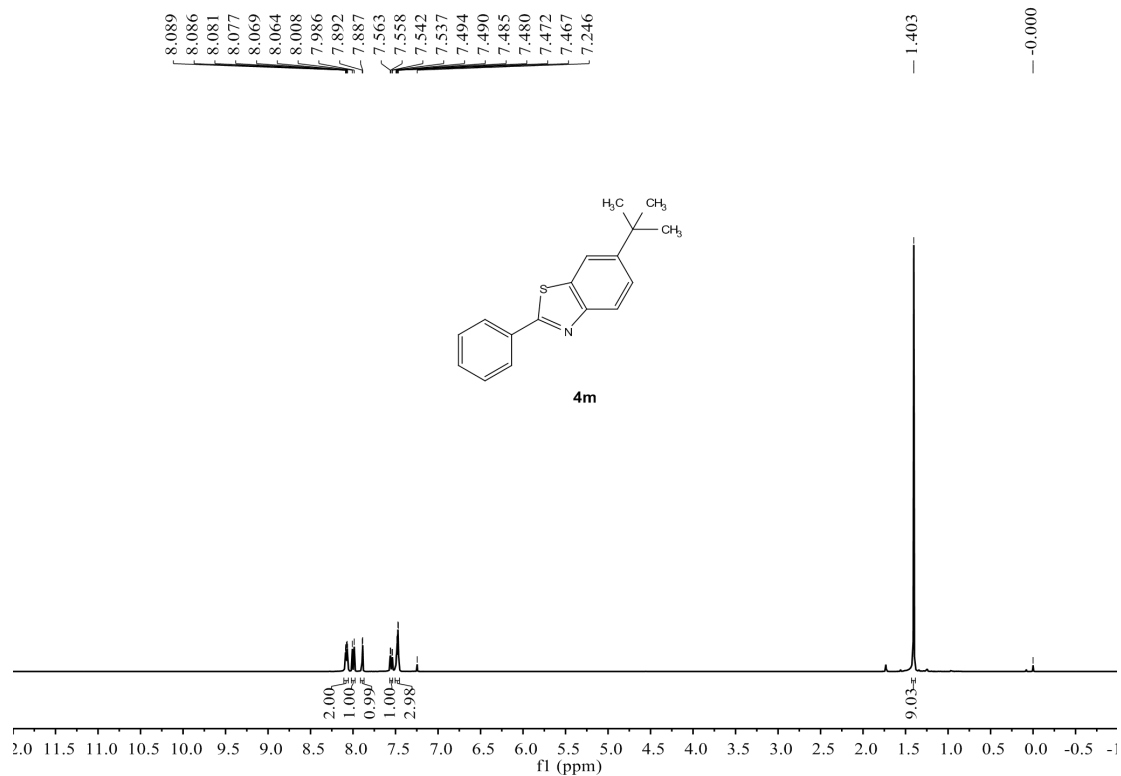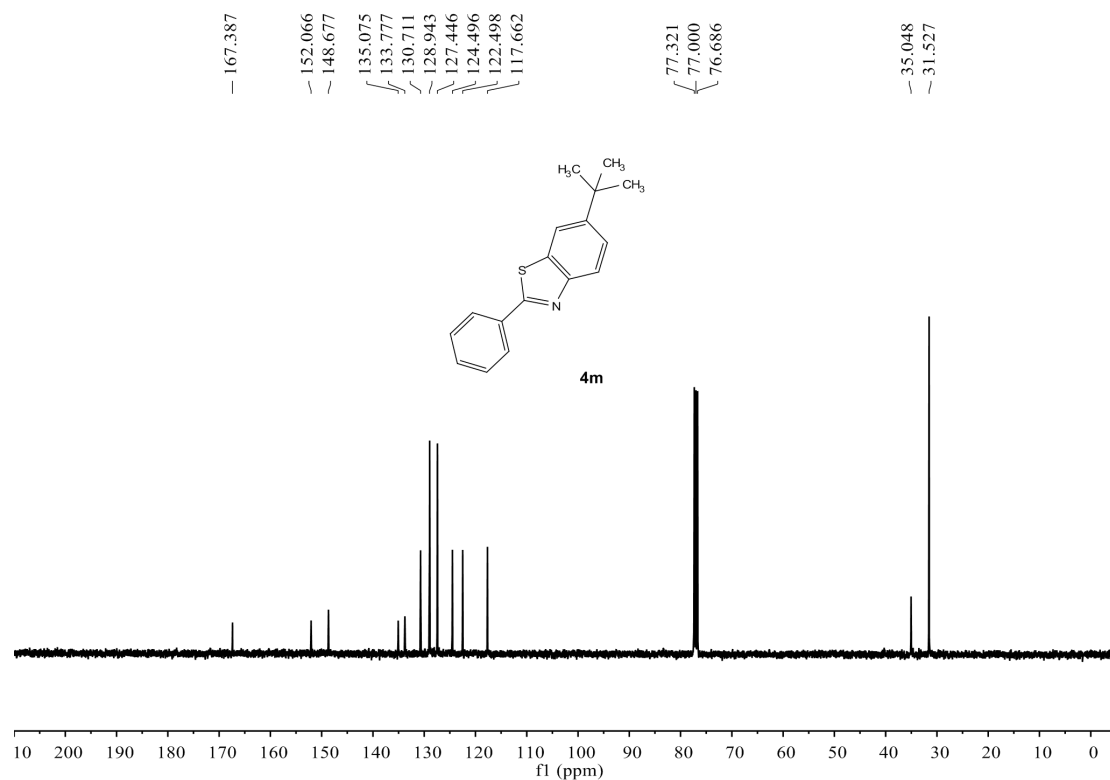



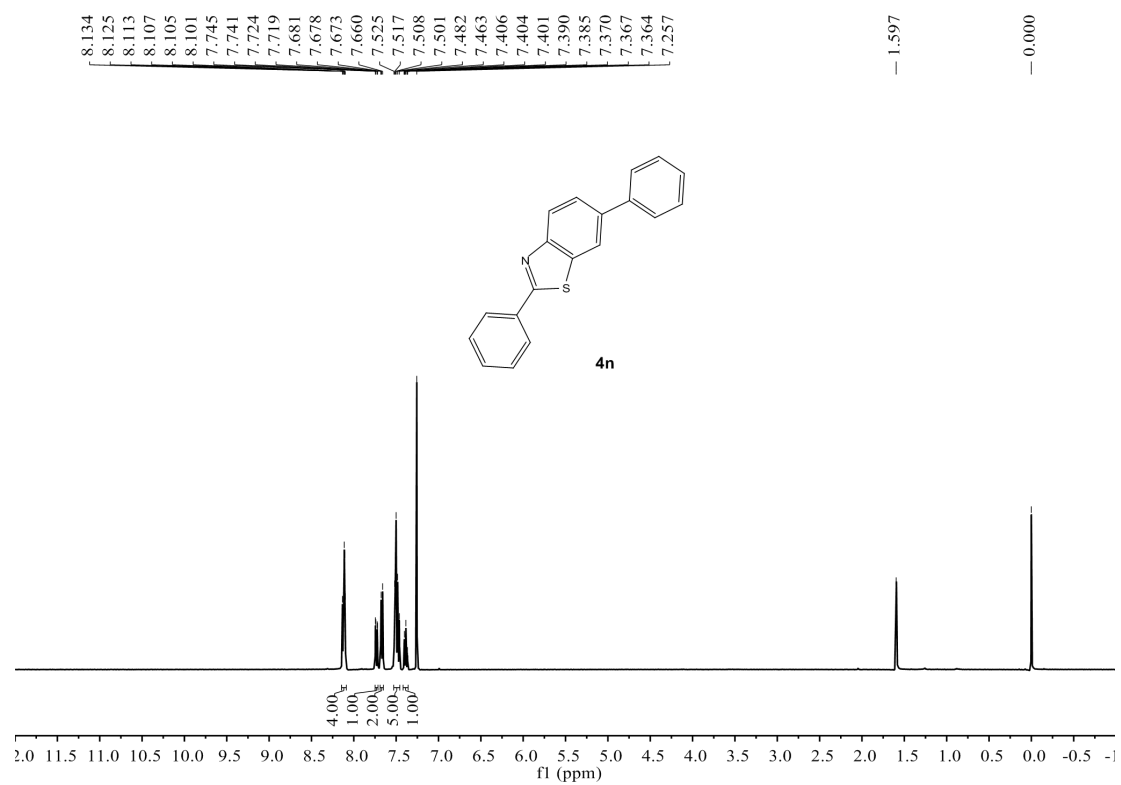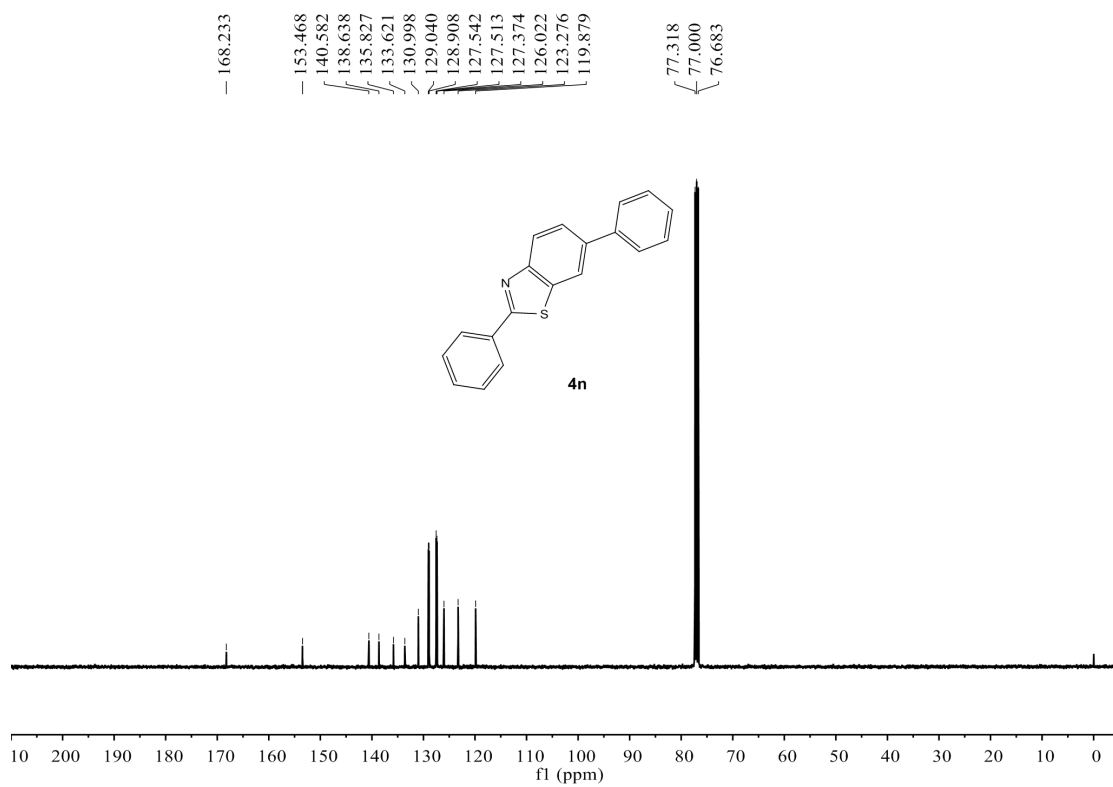

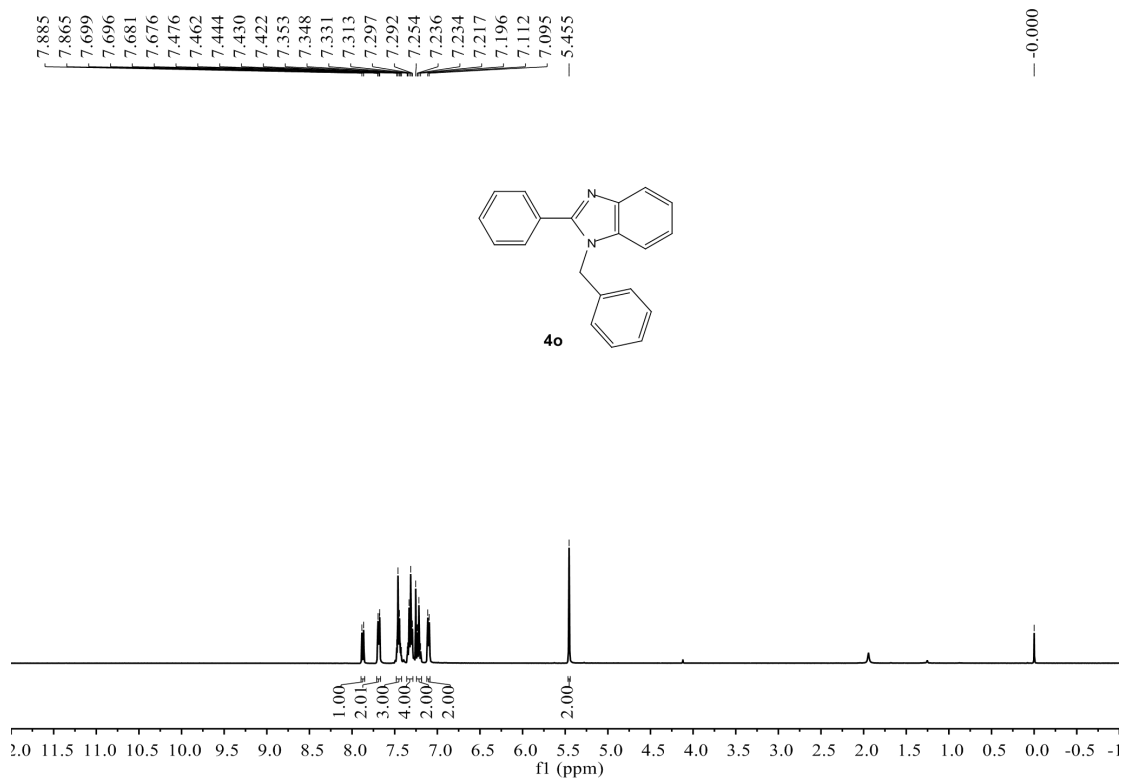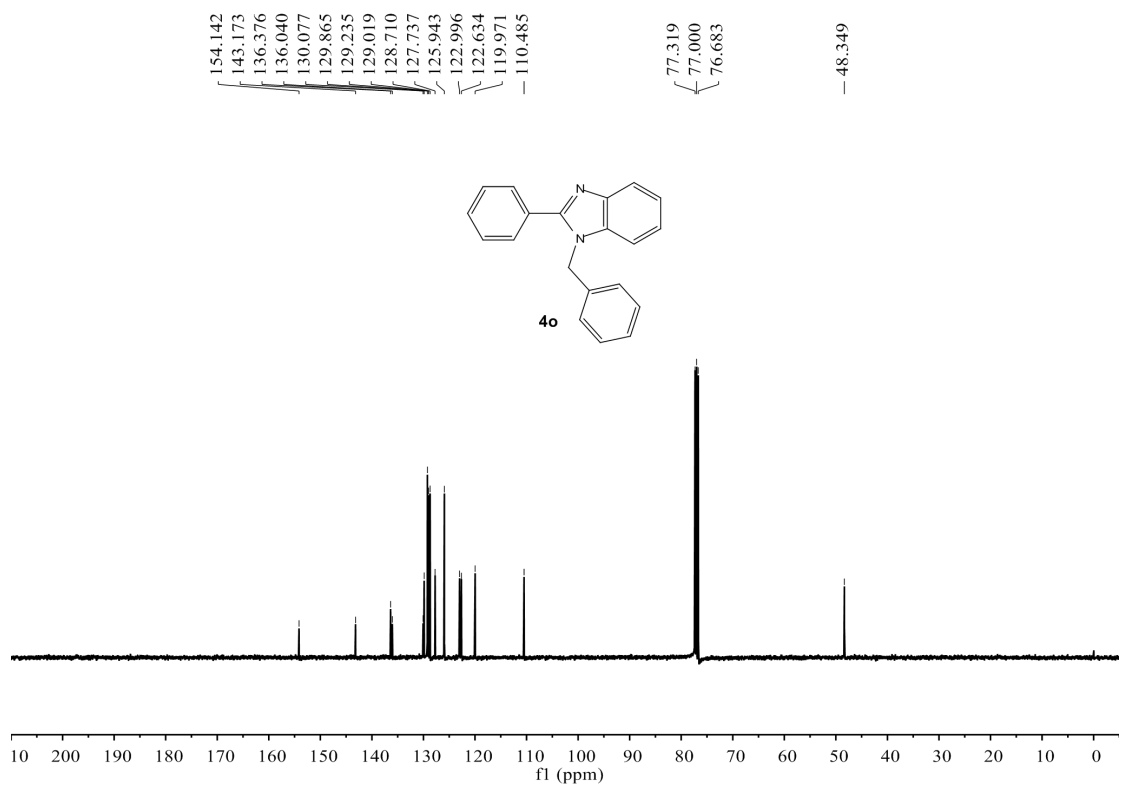

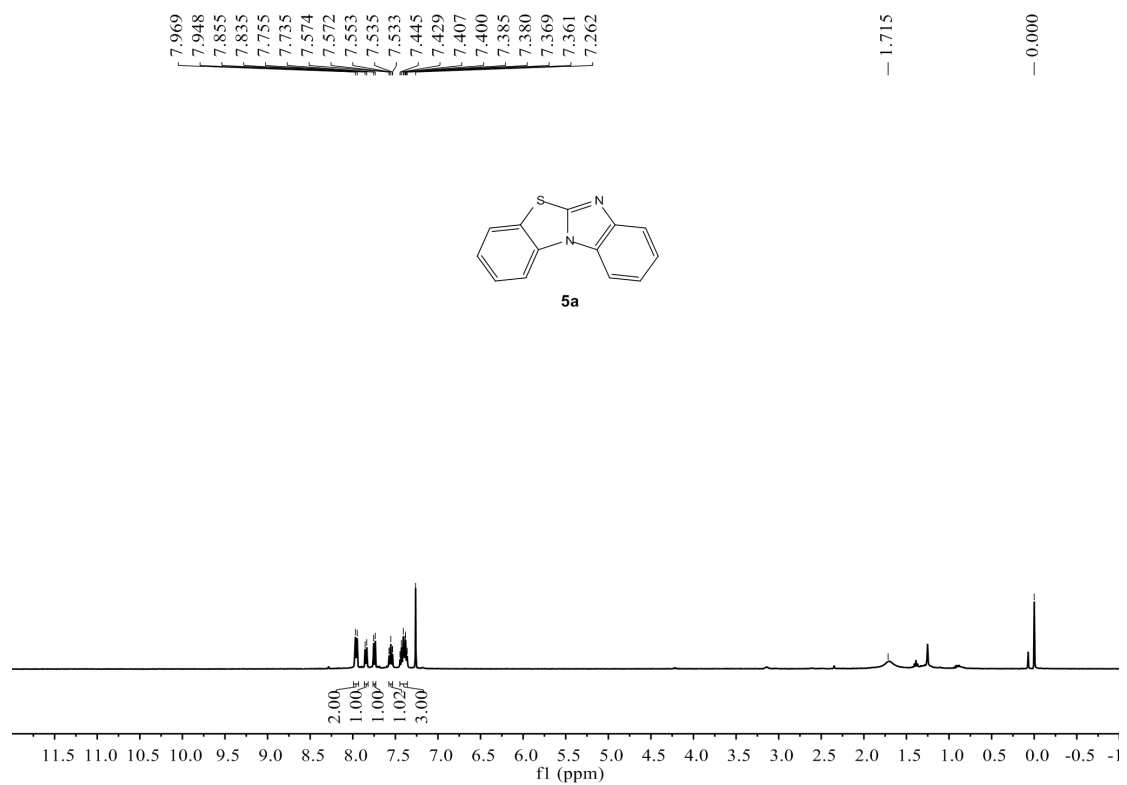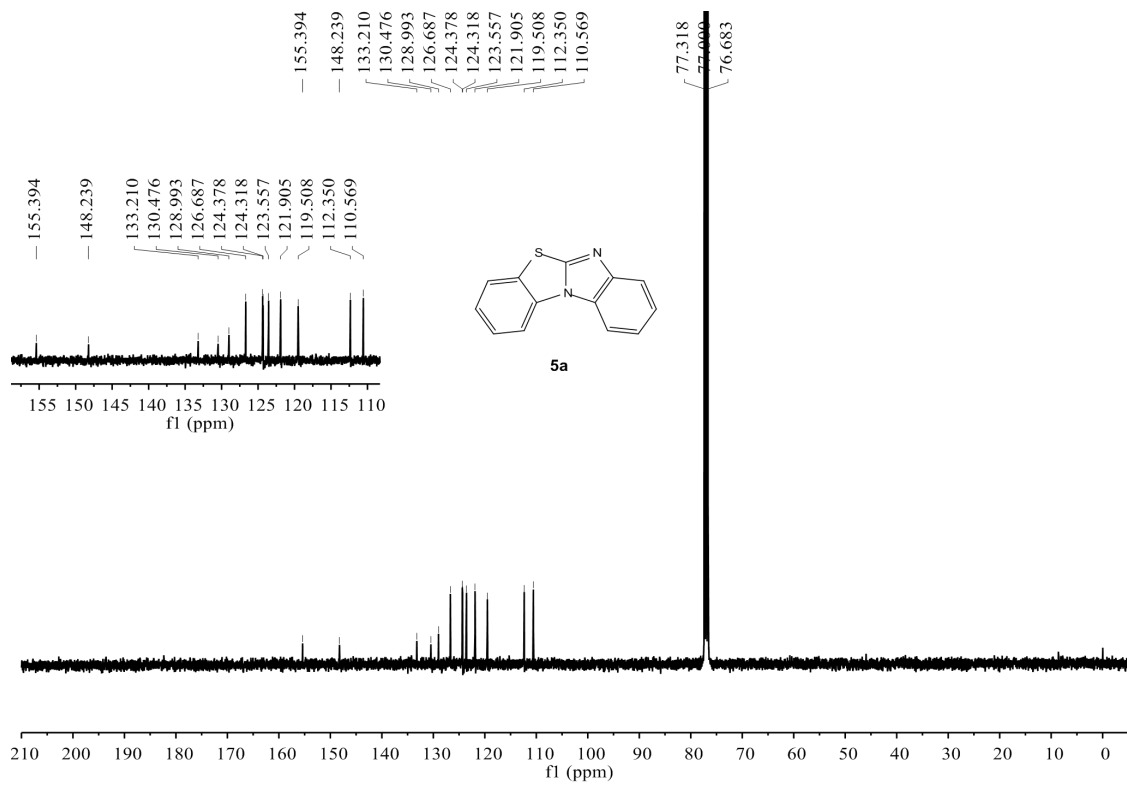

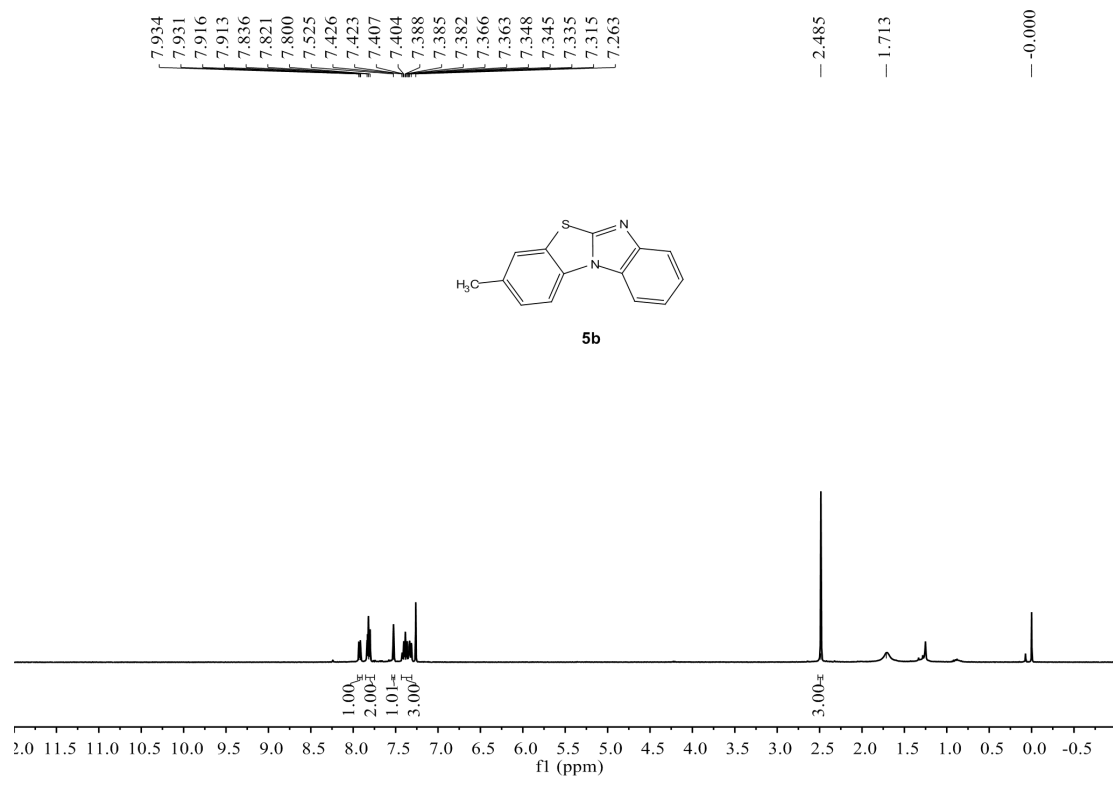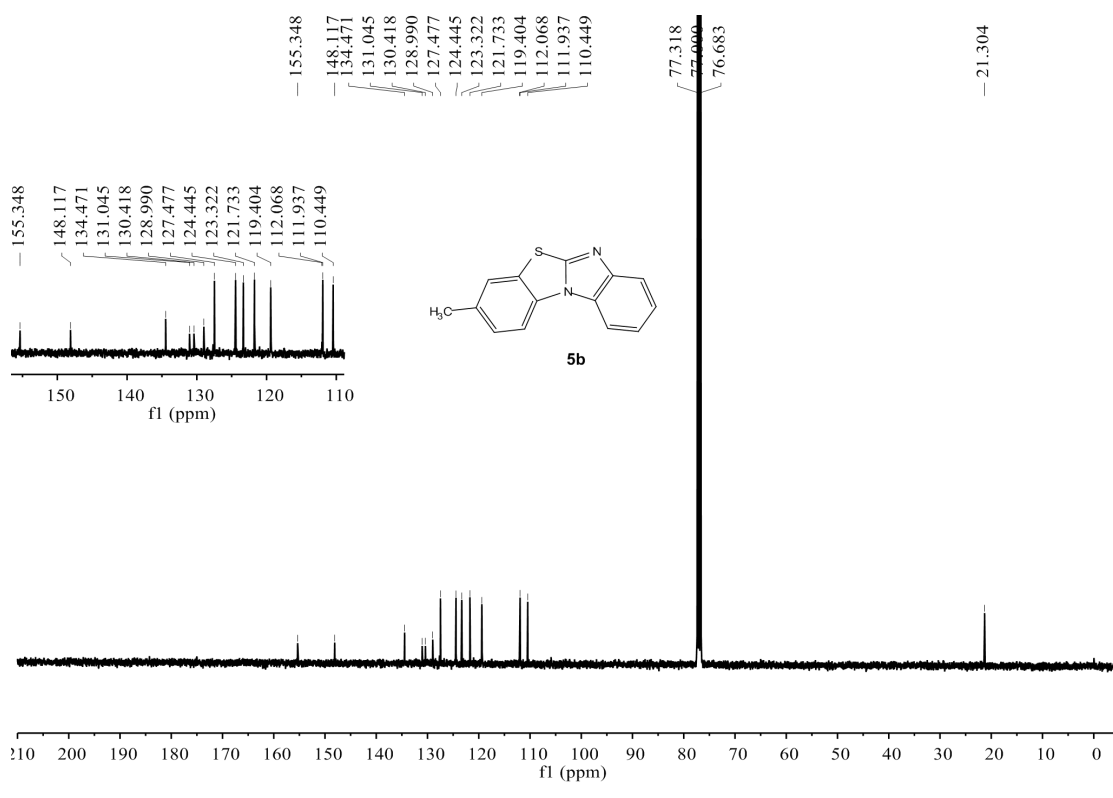

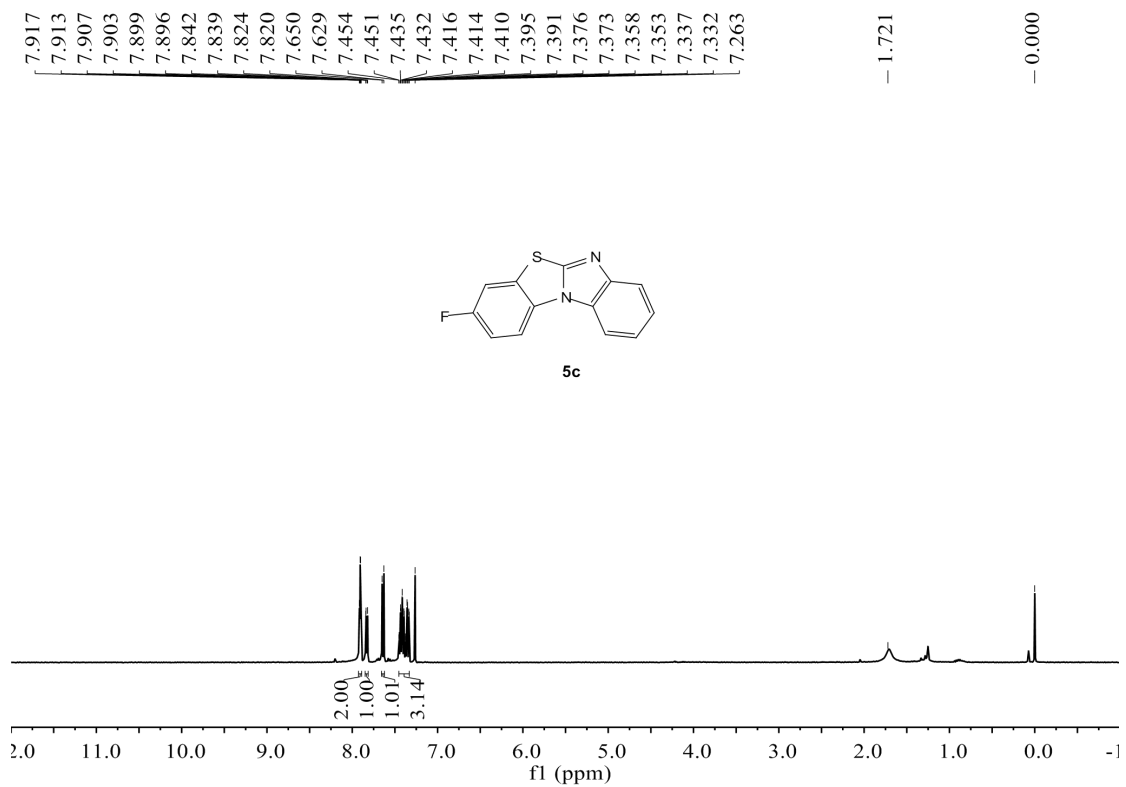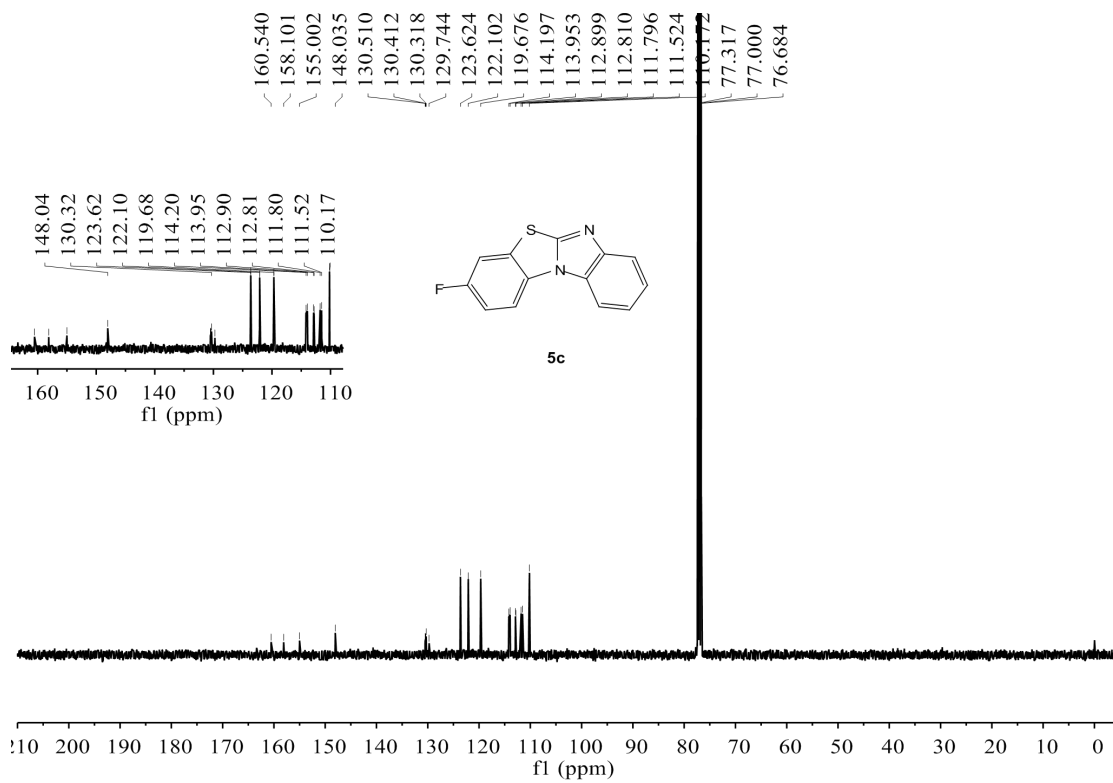

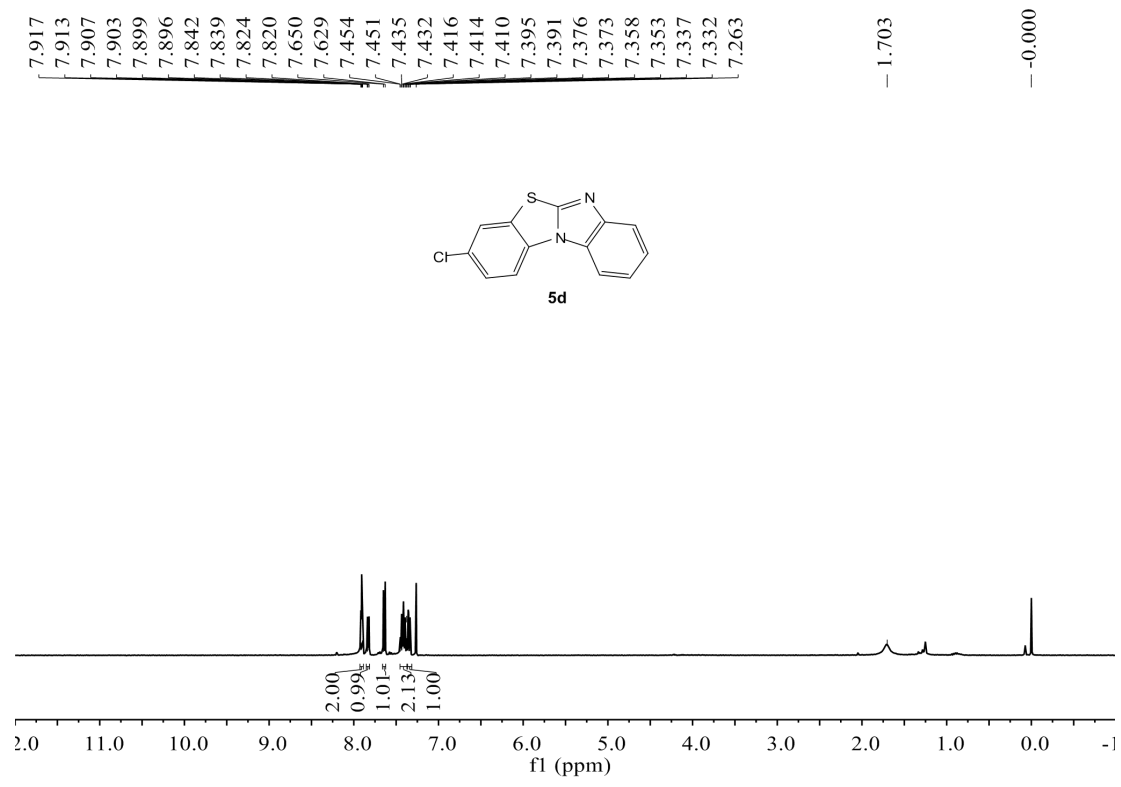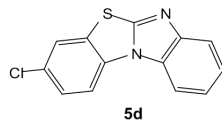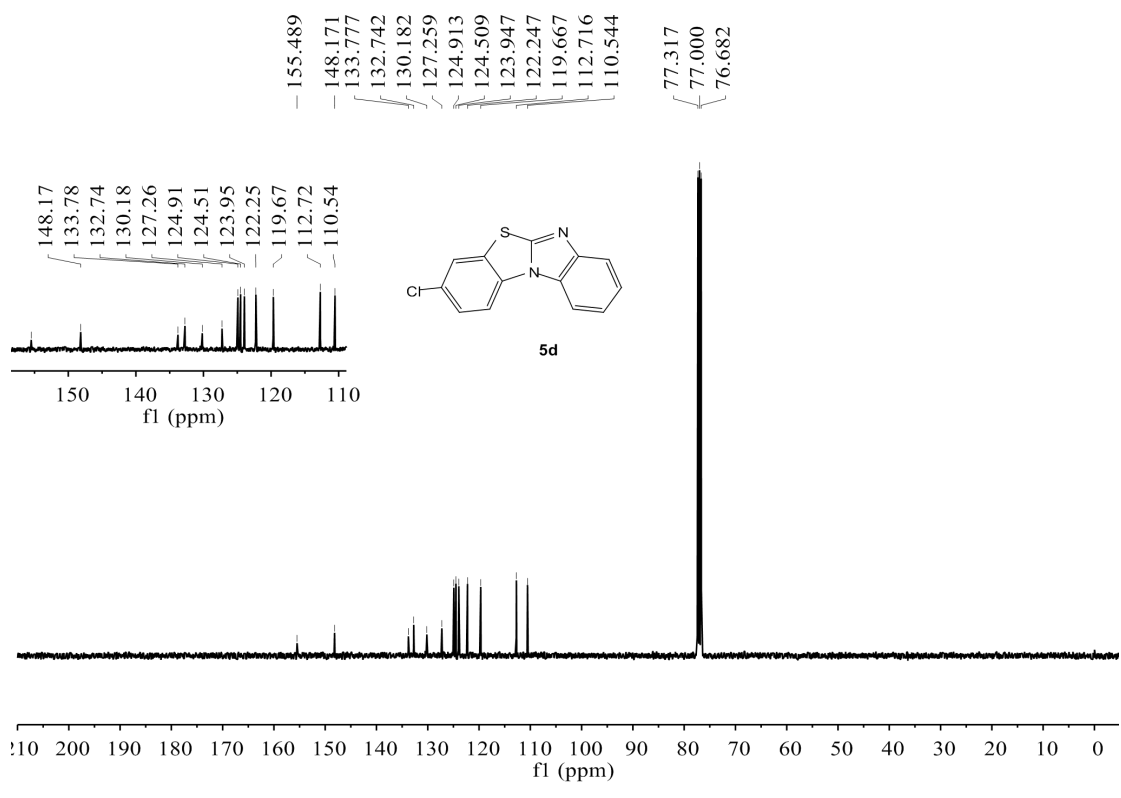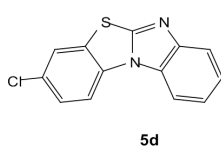

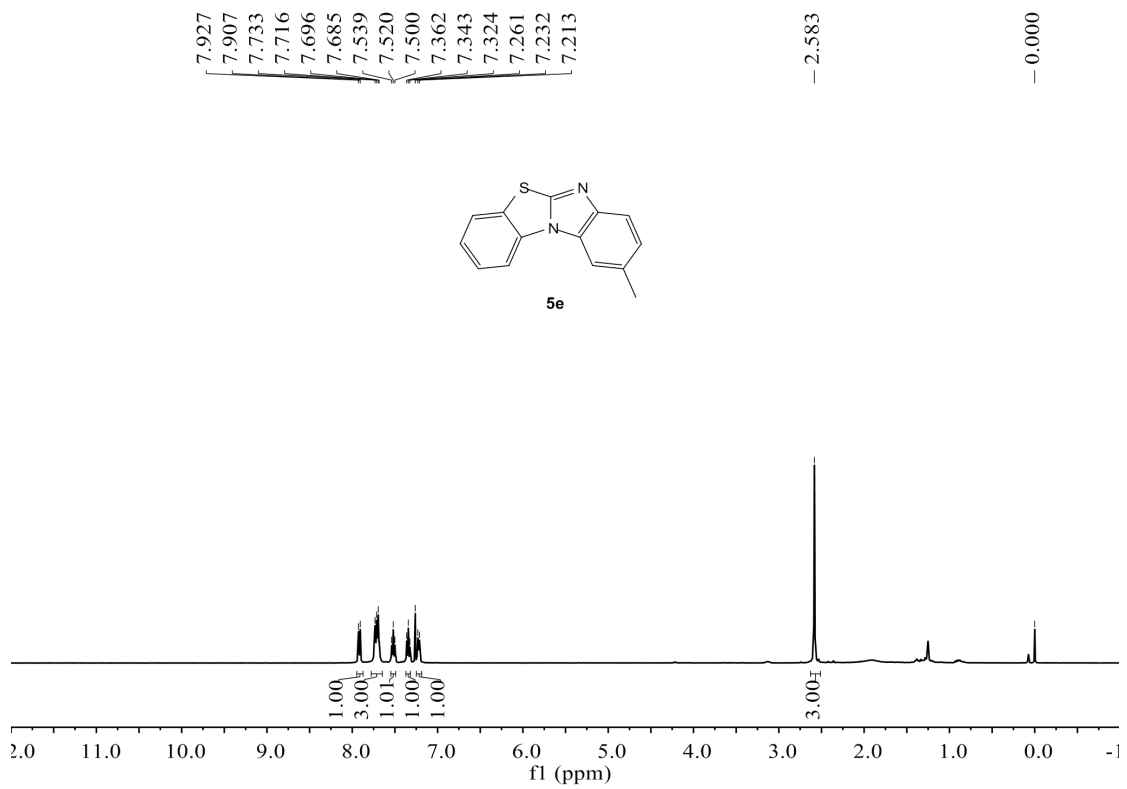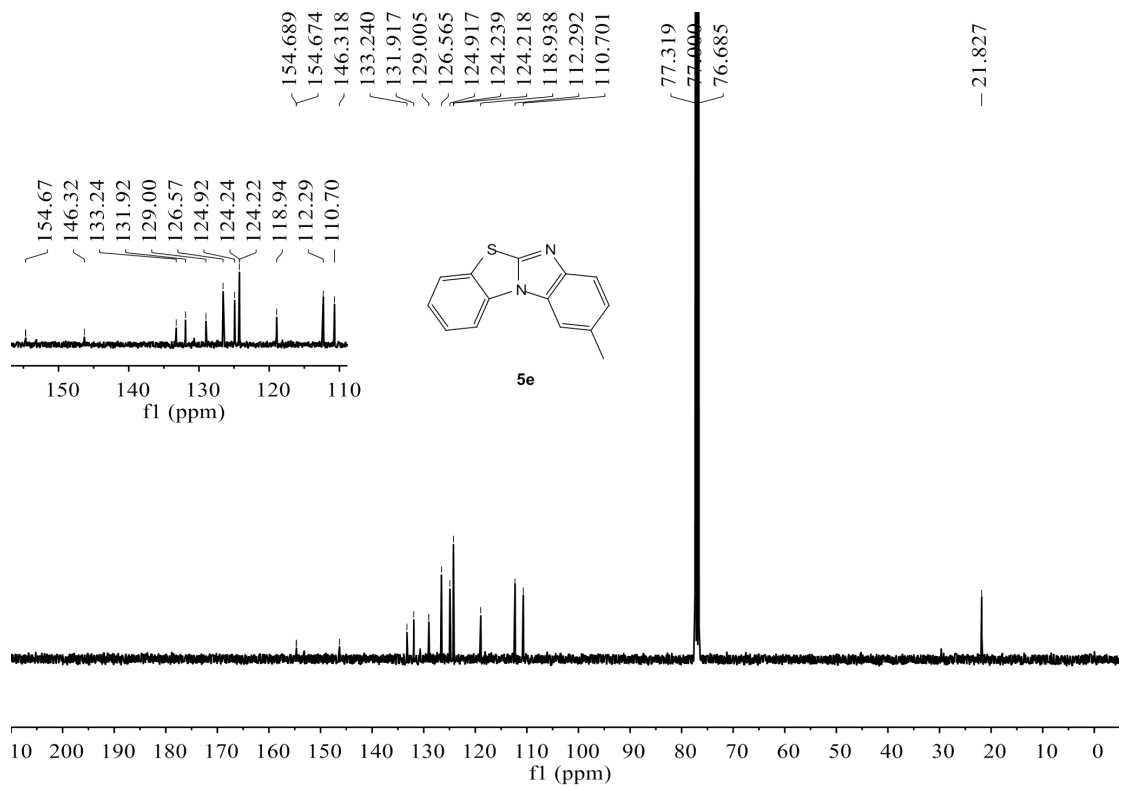

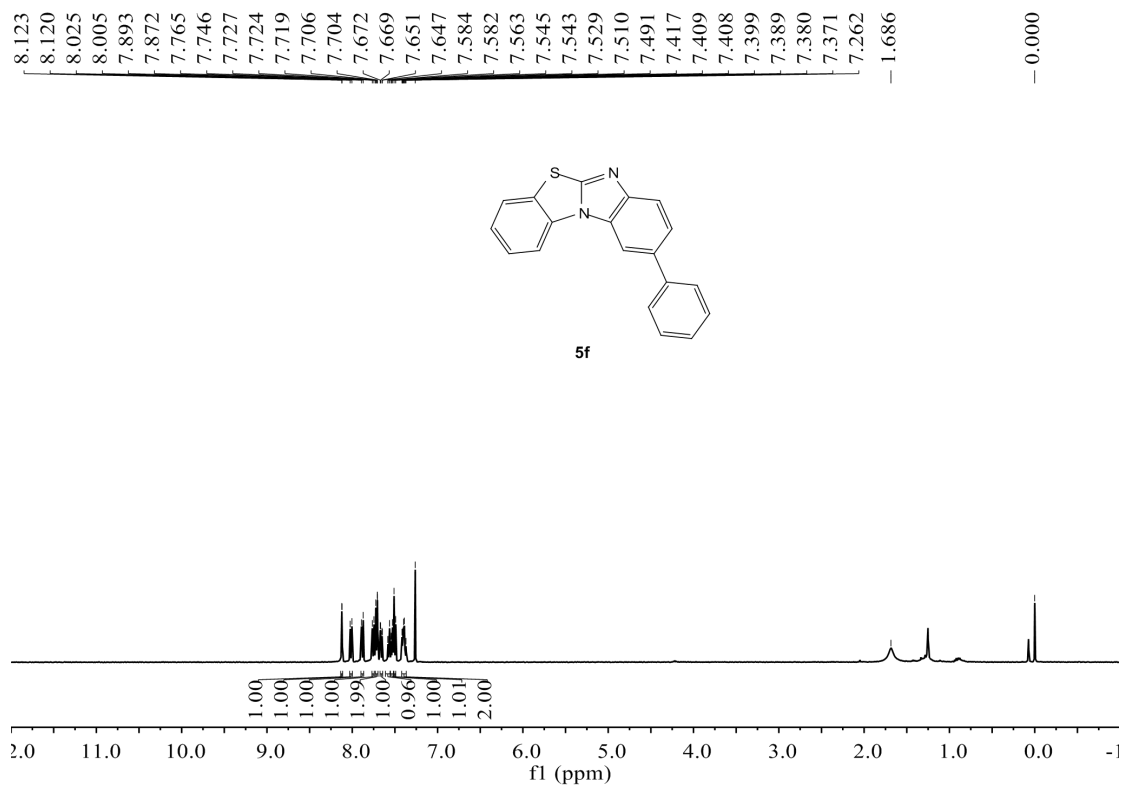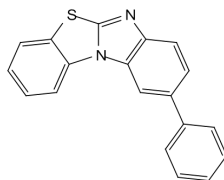

5f

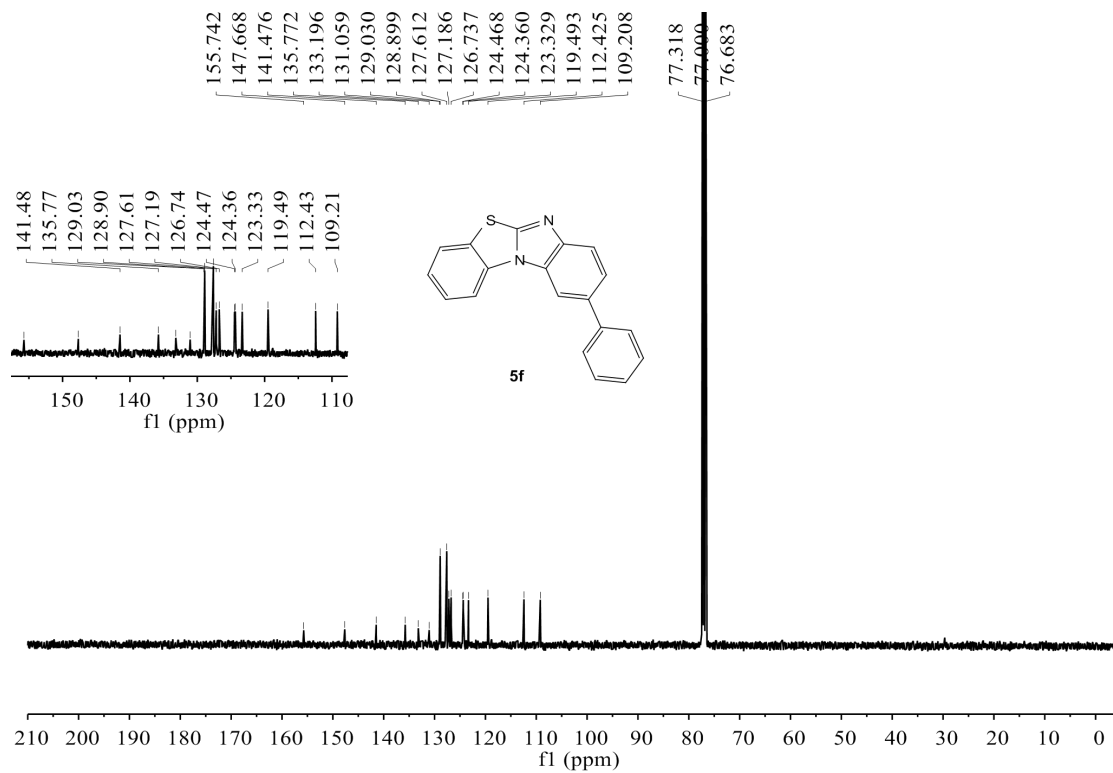



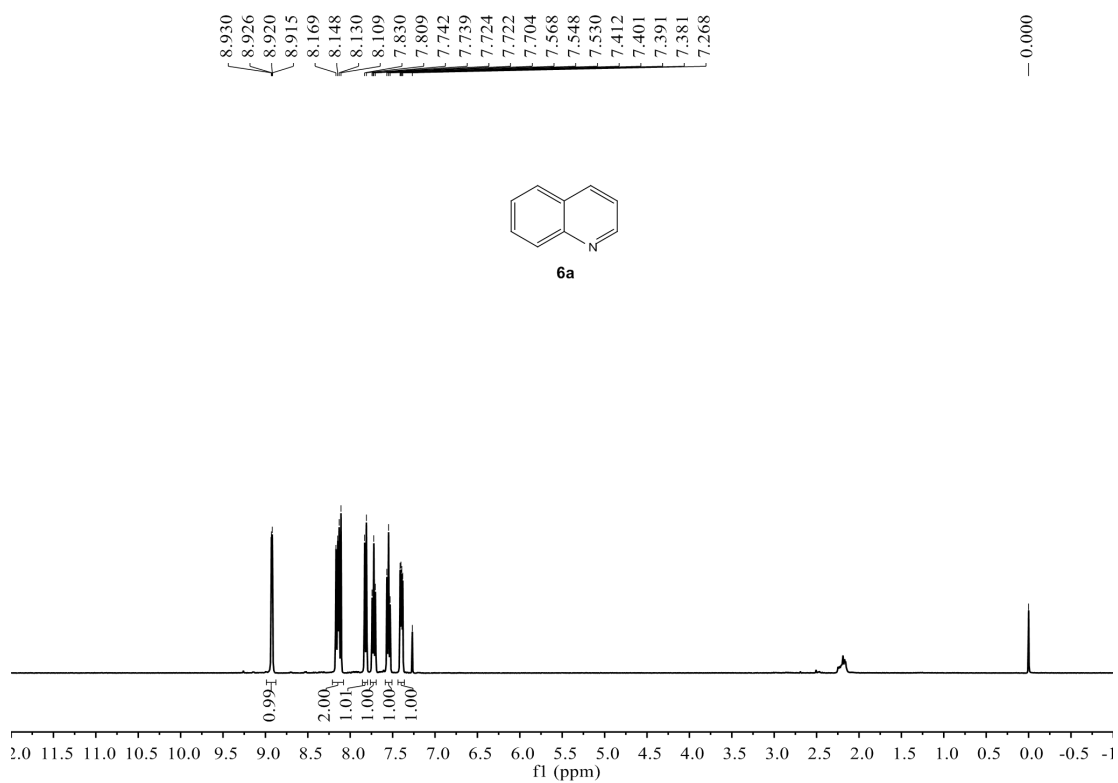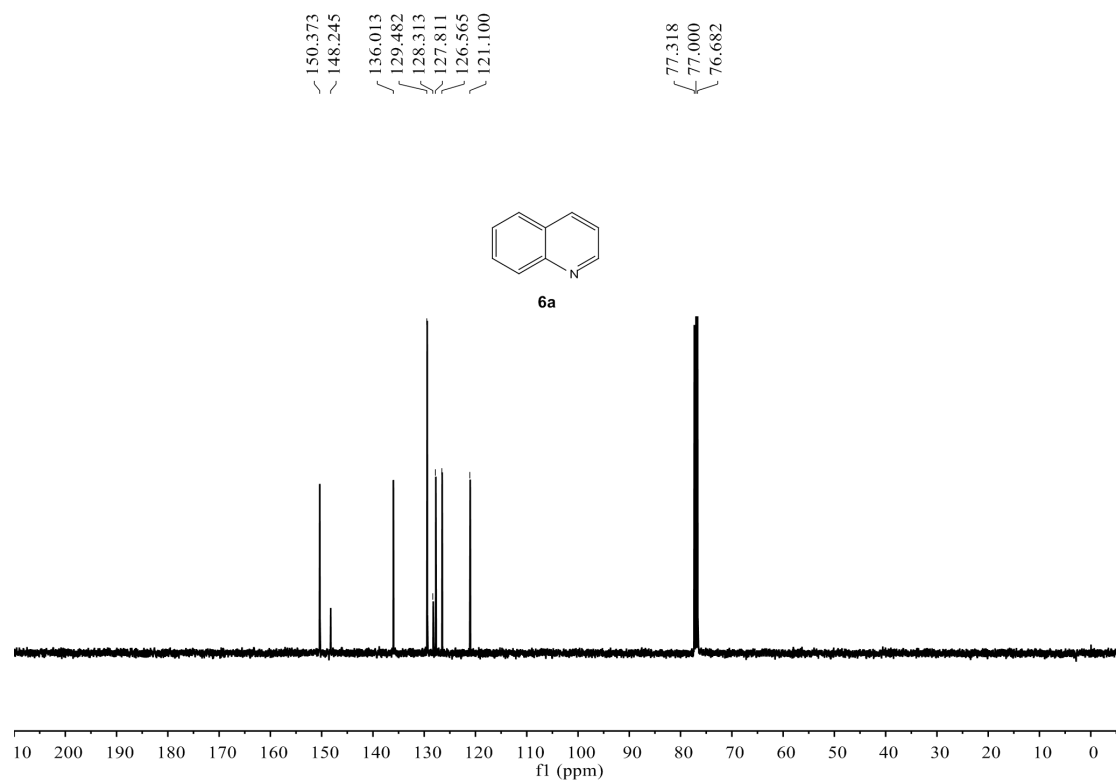

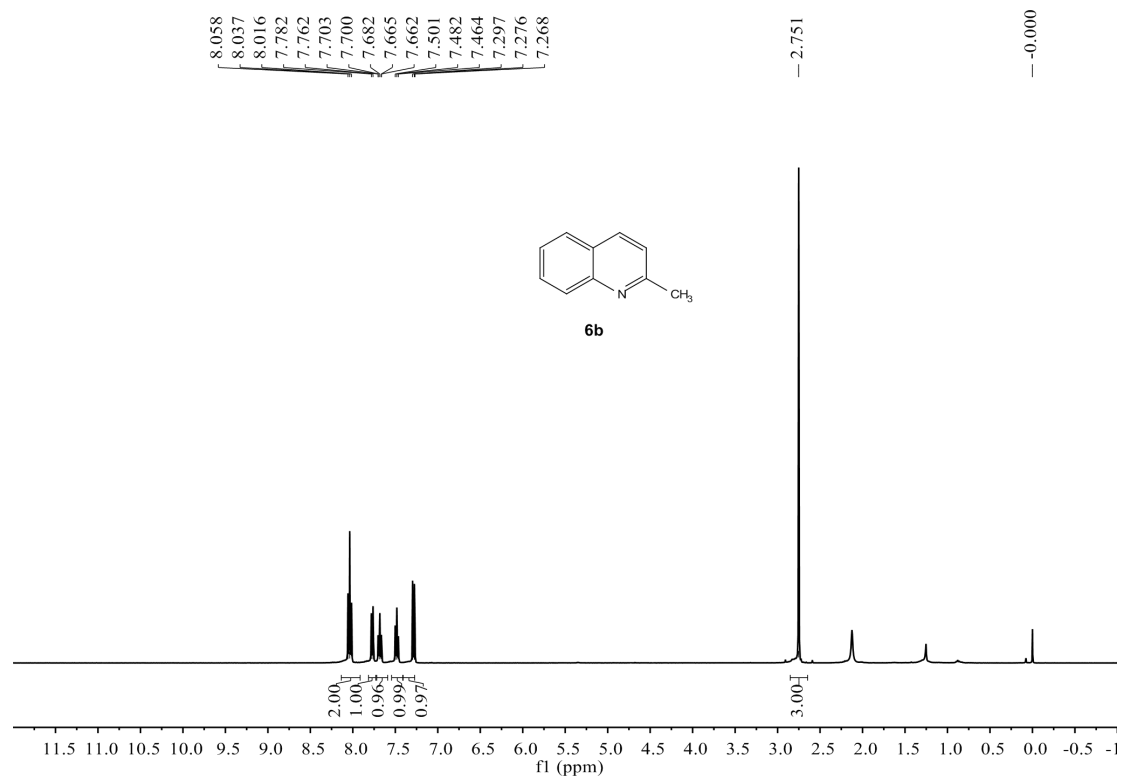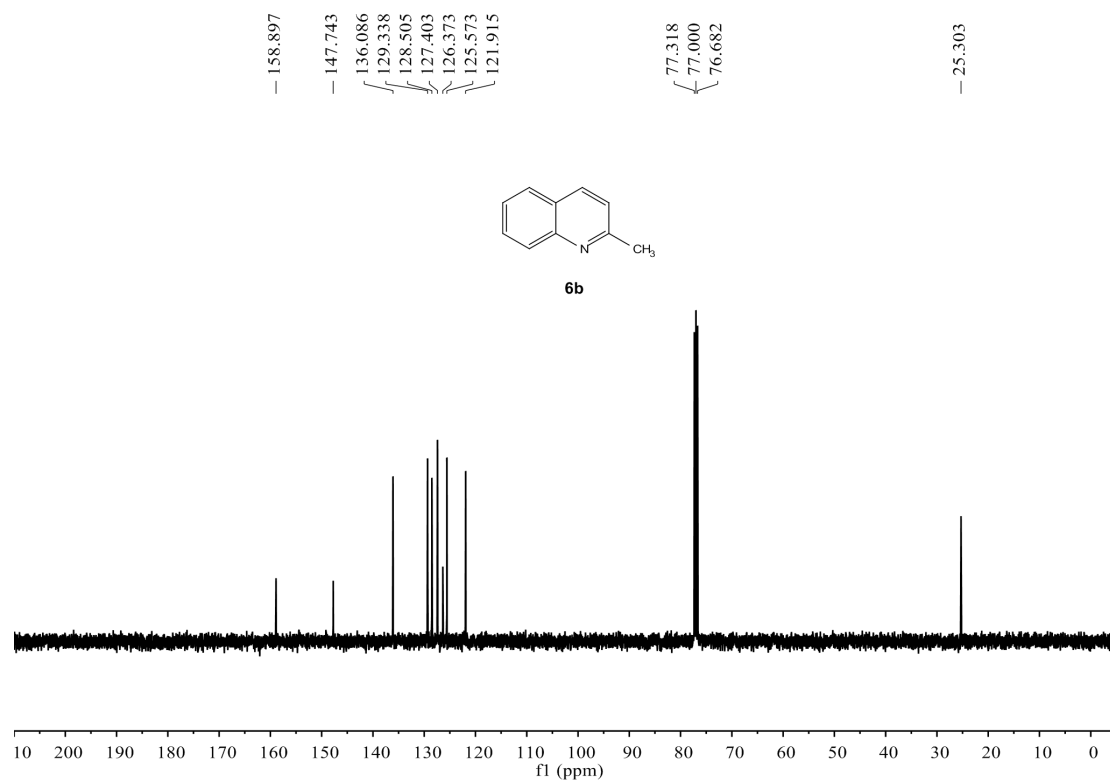

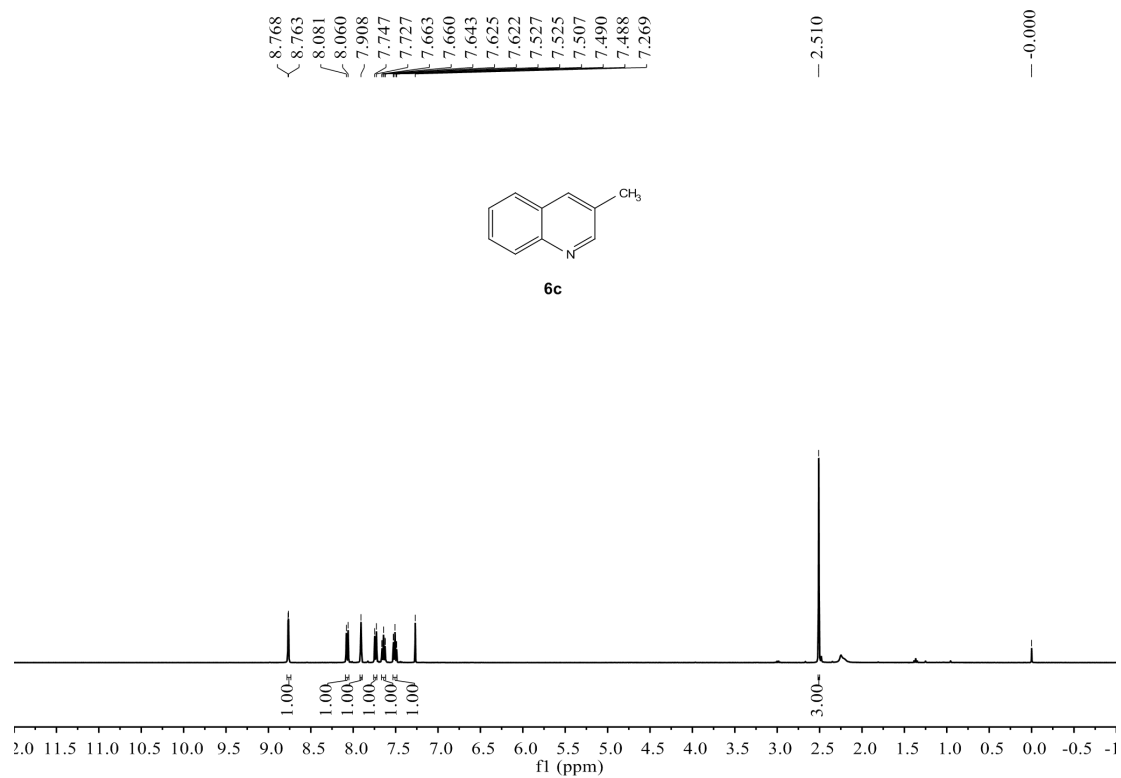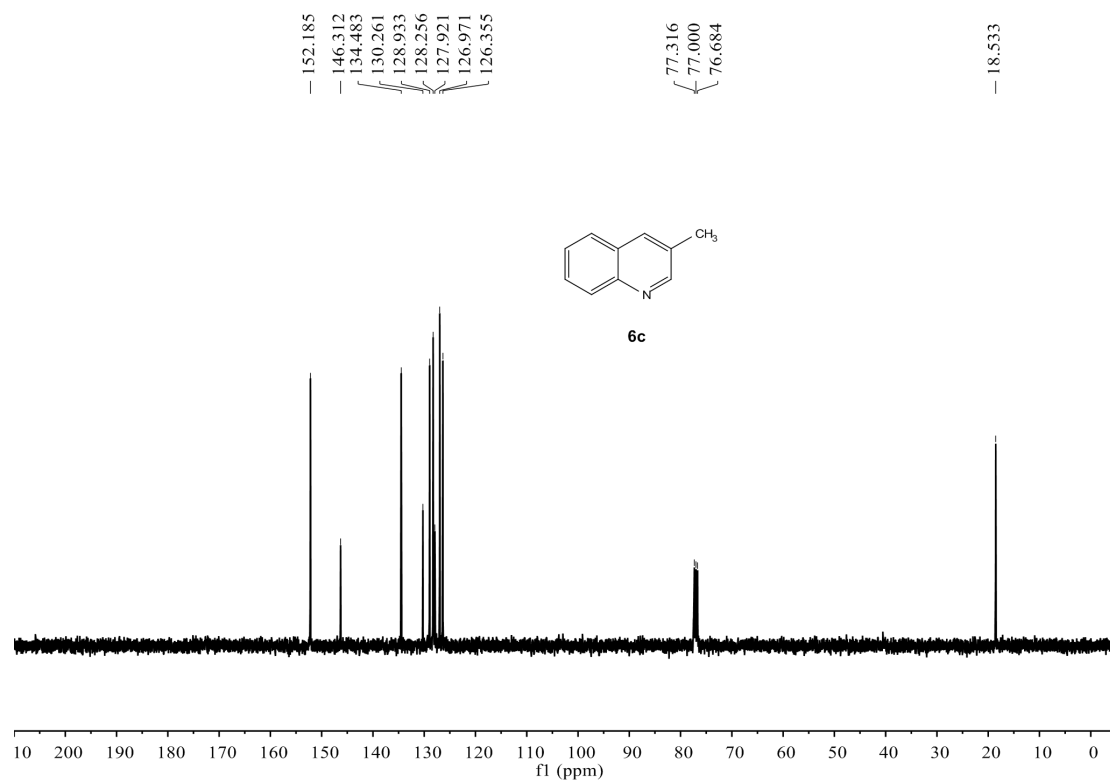

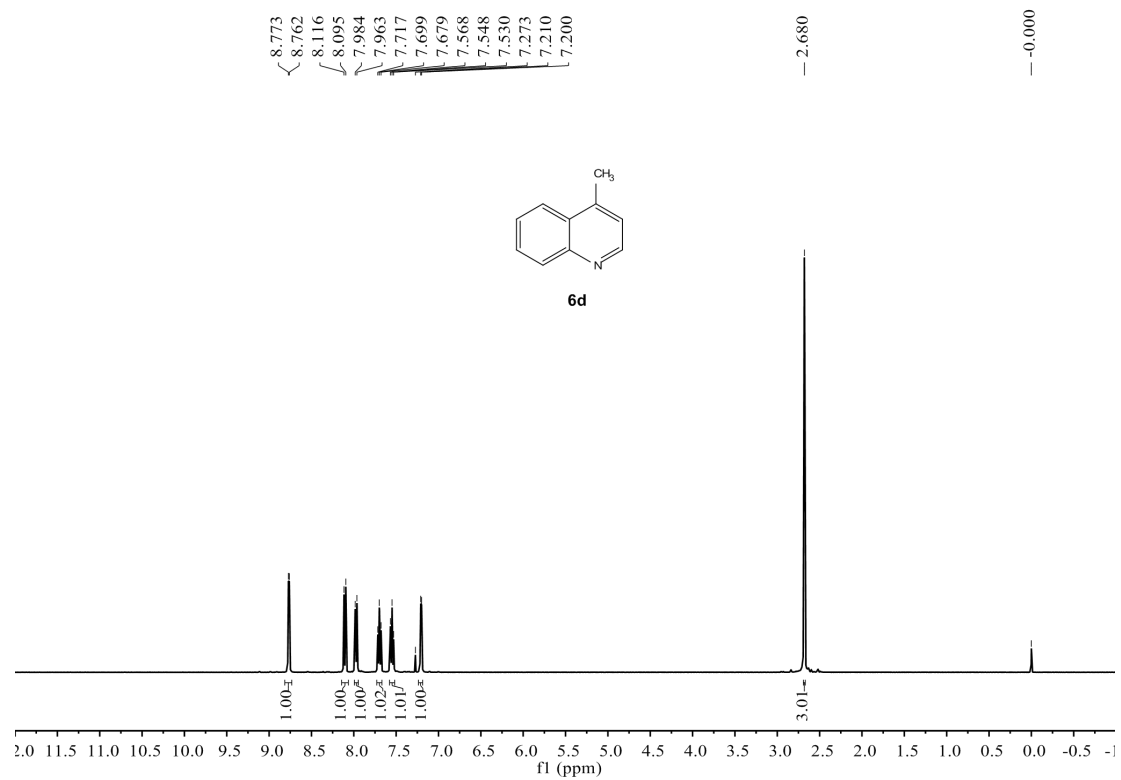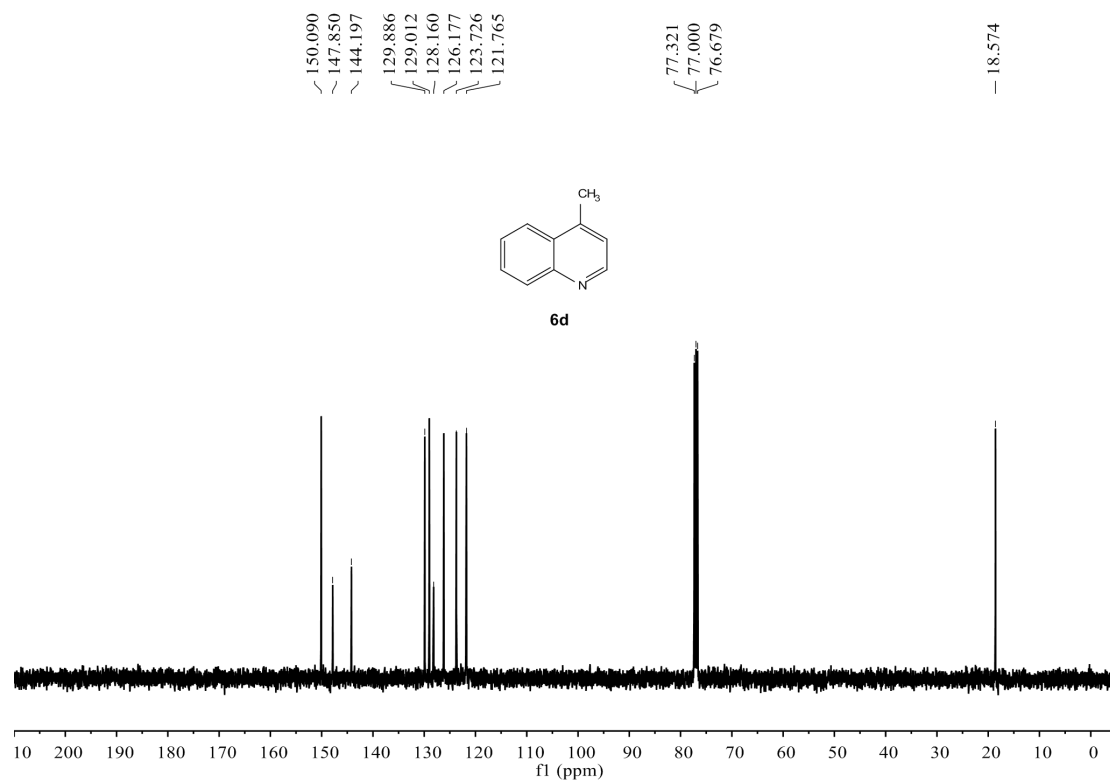

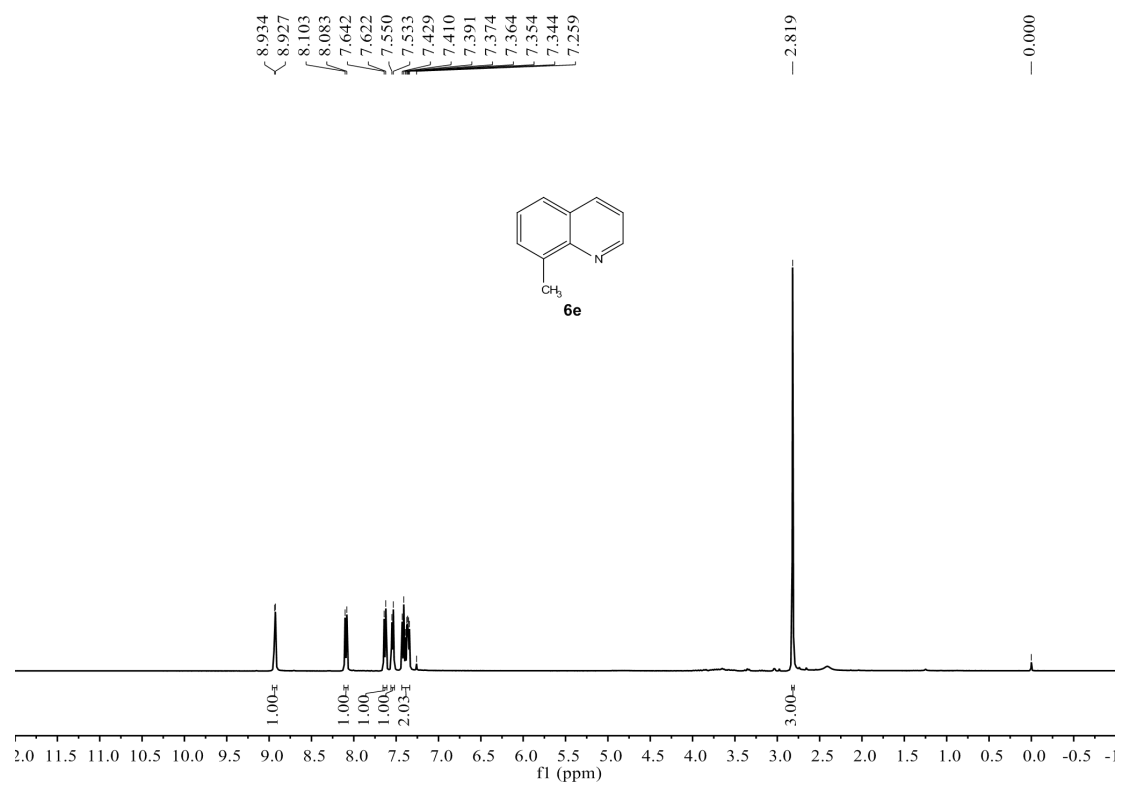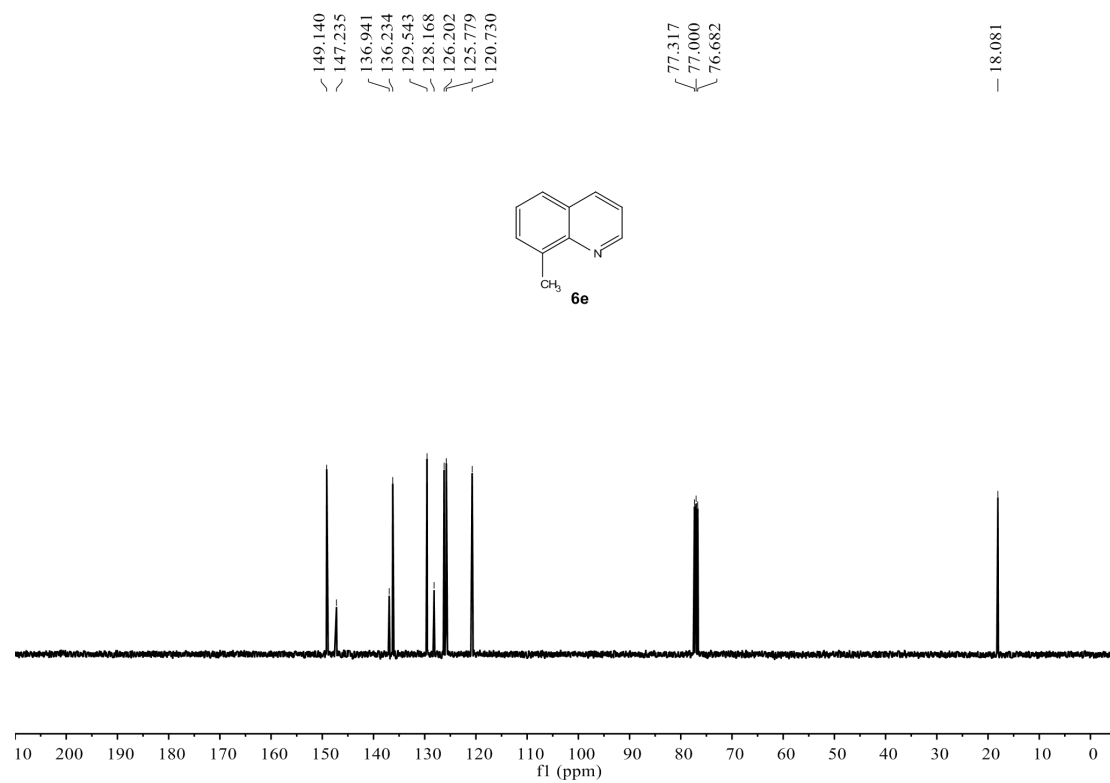

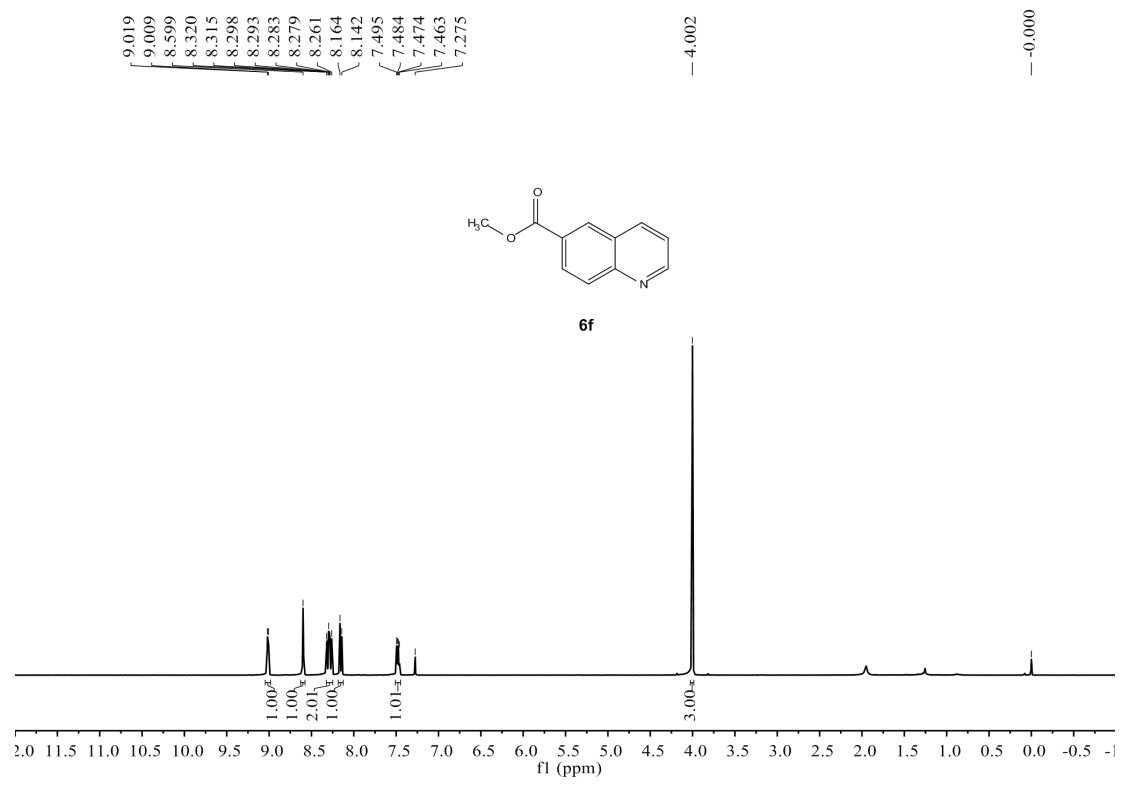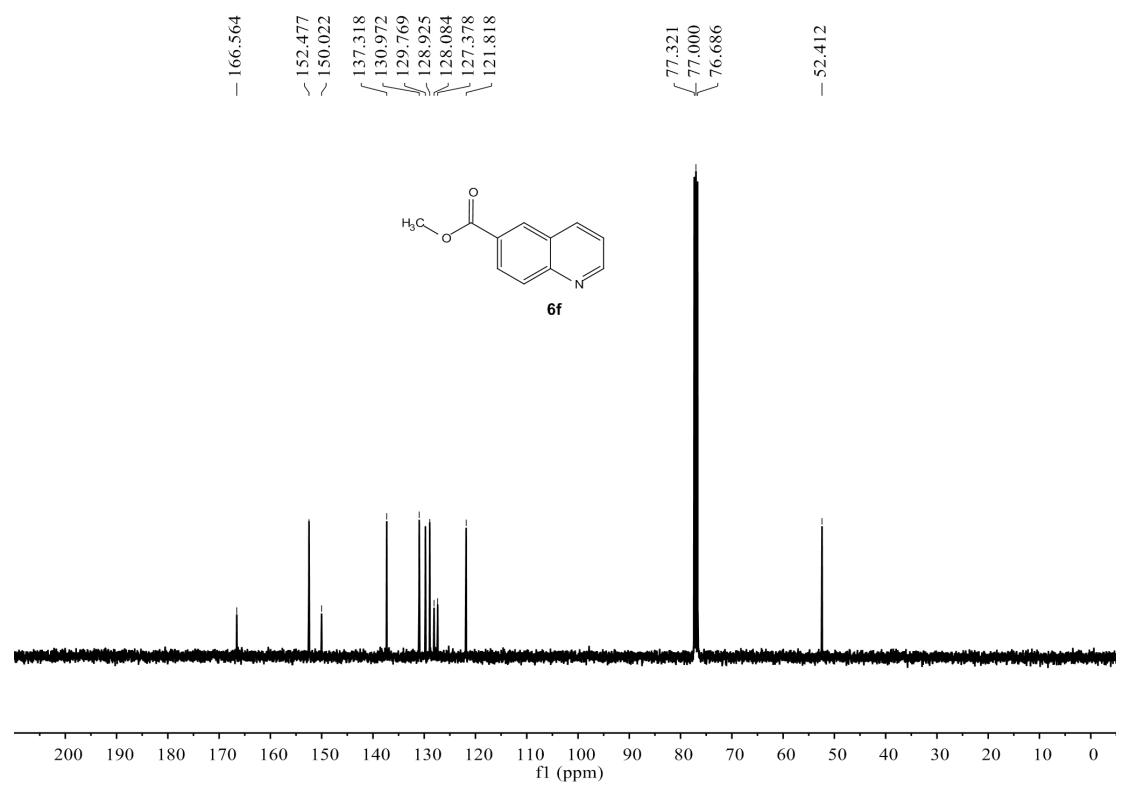

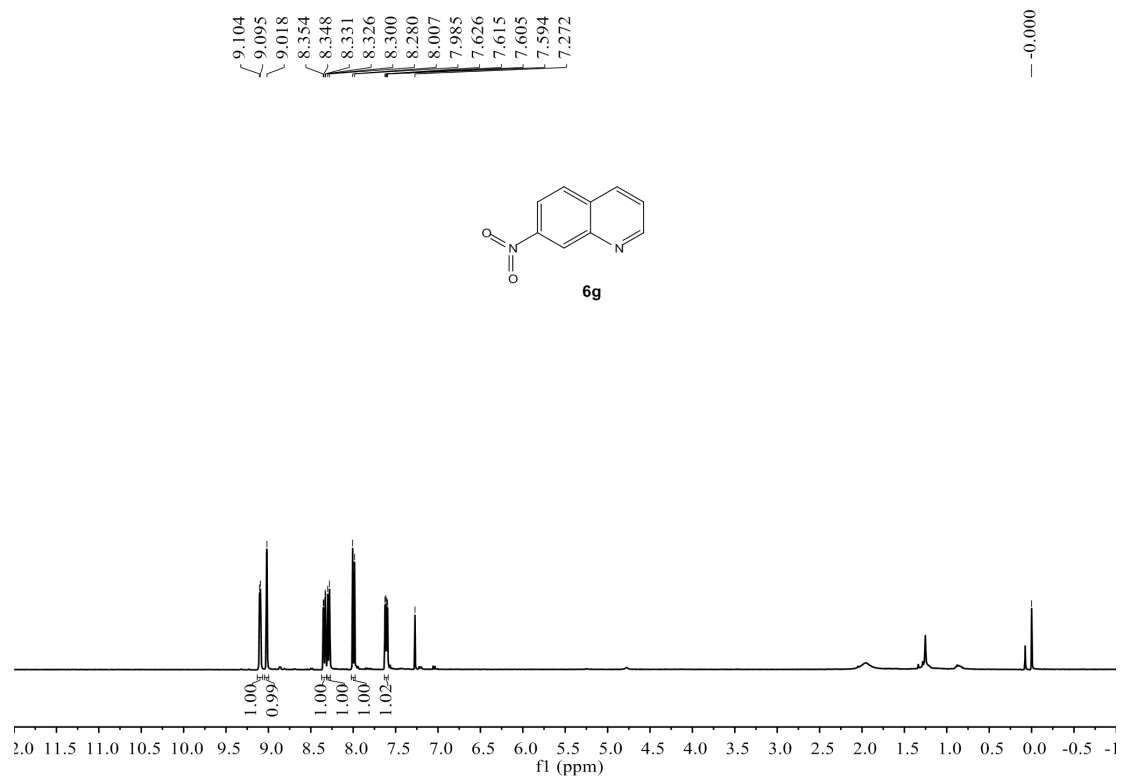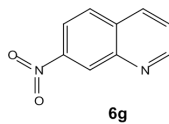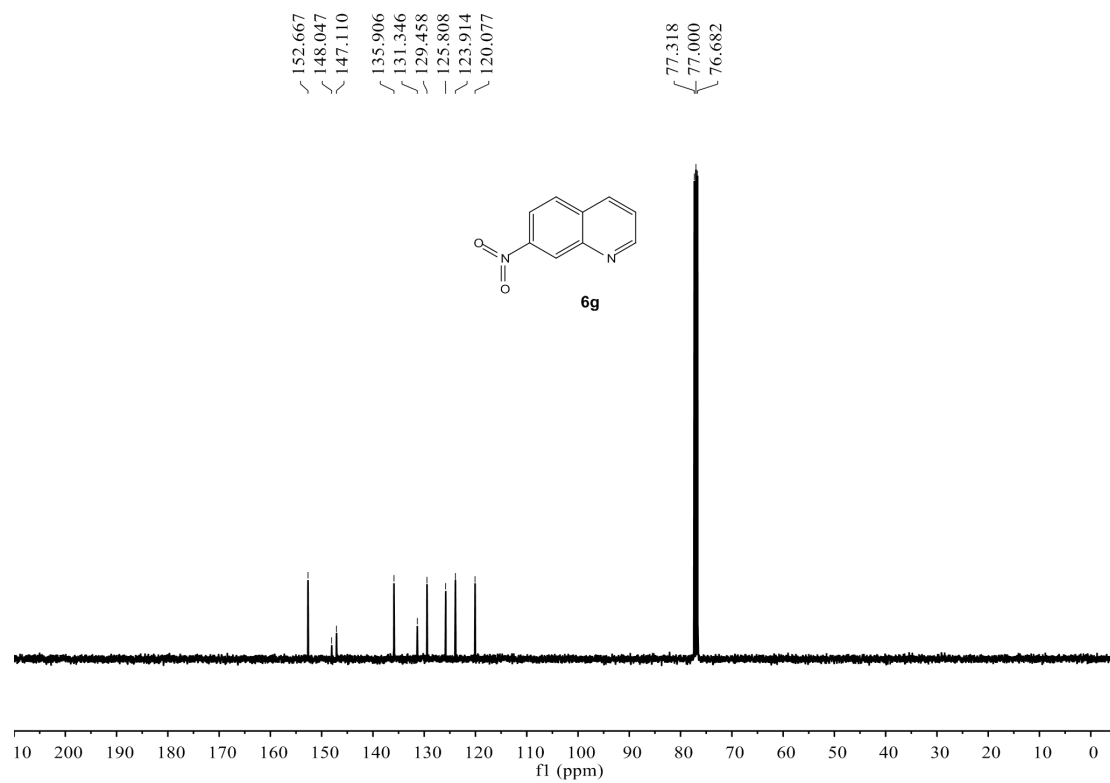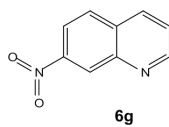

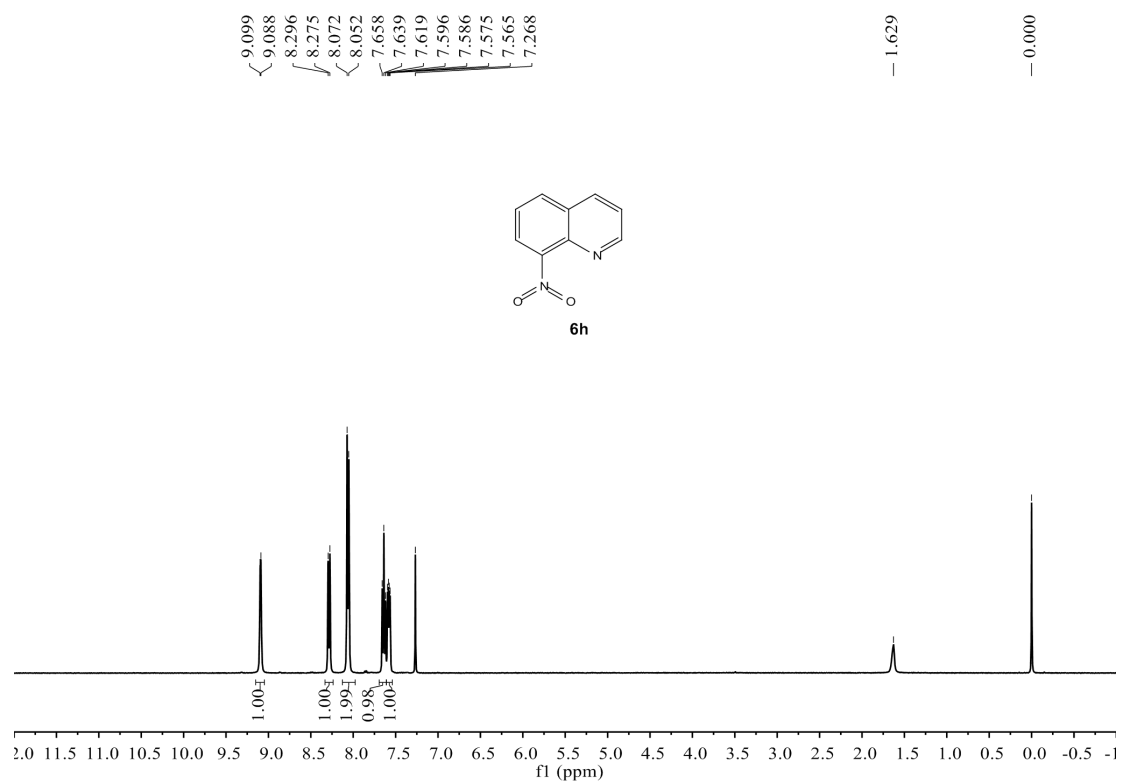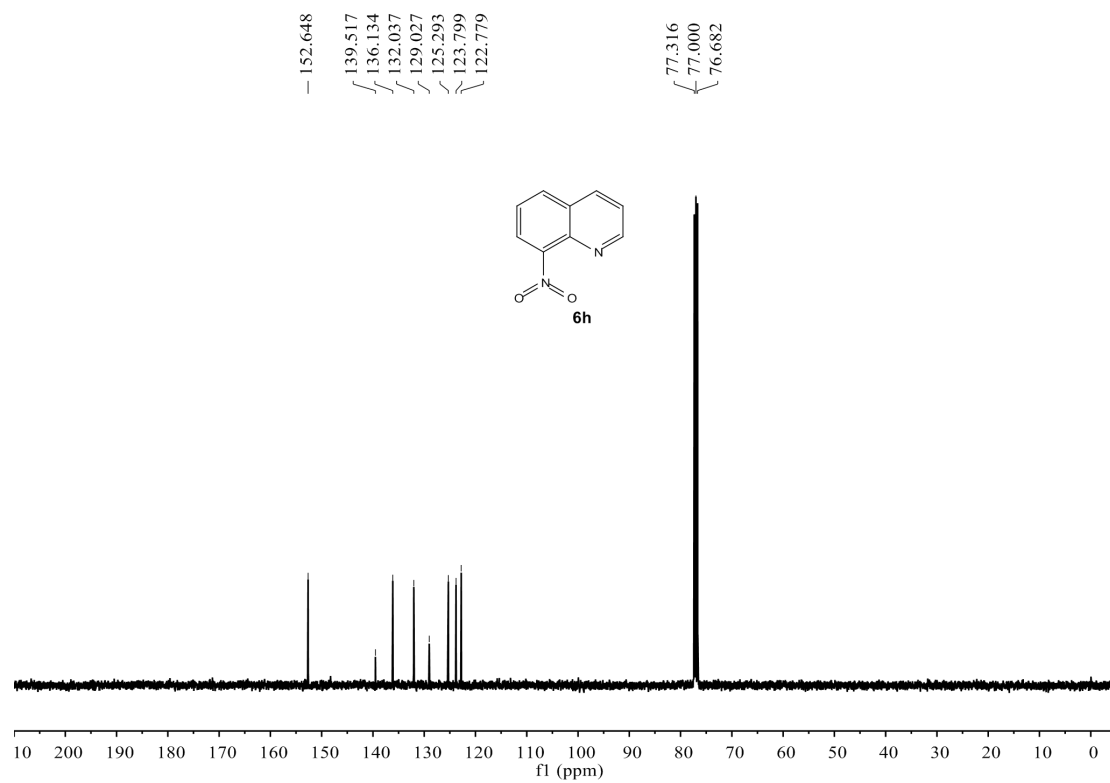



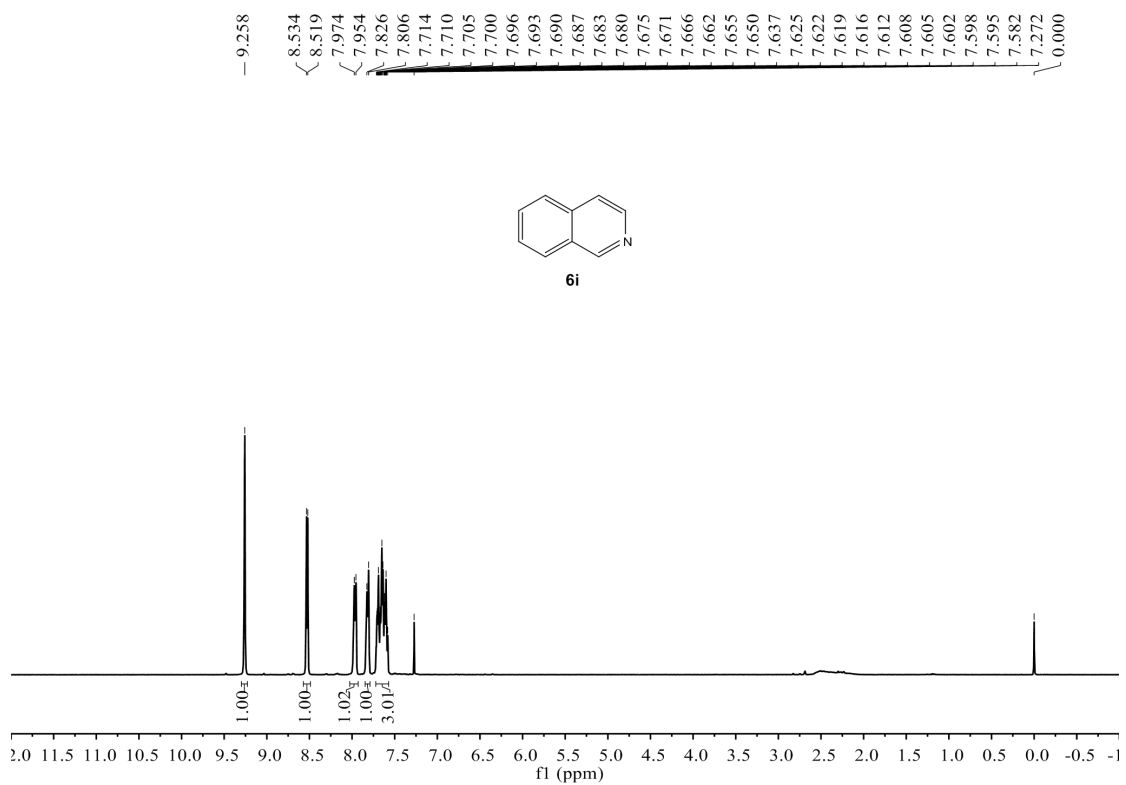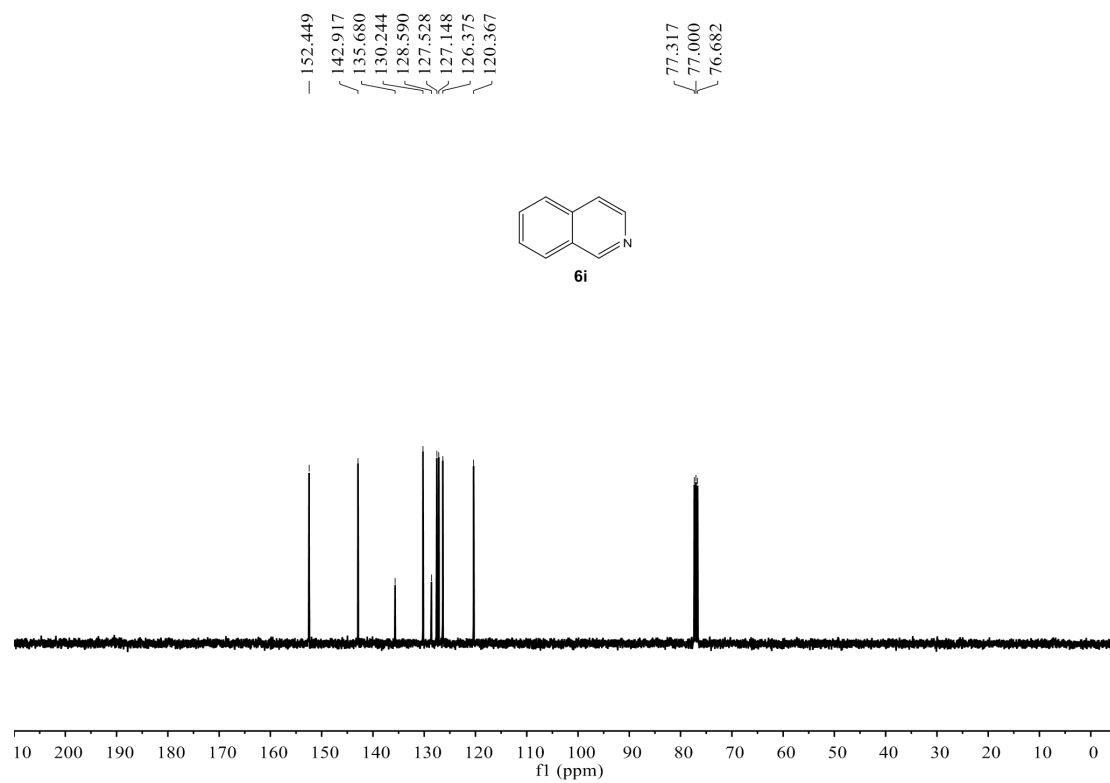

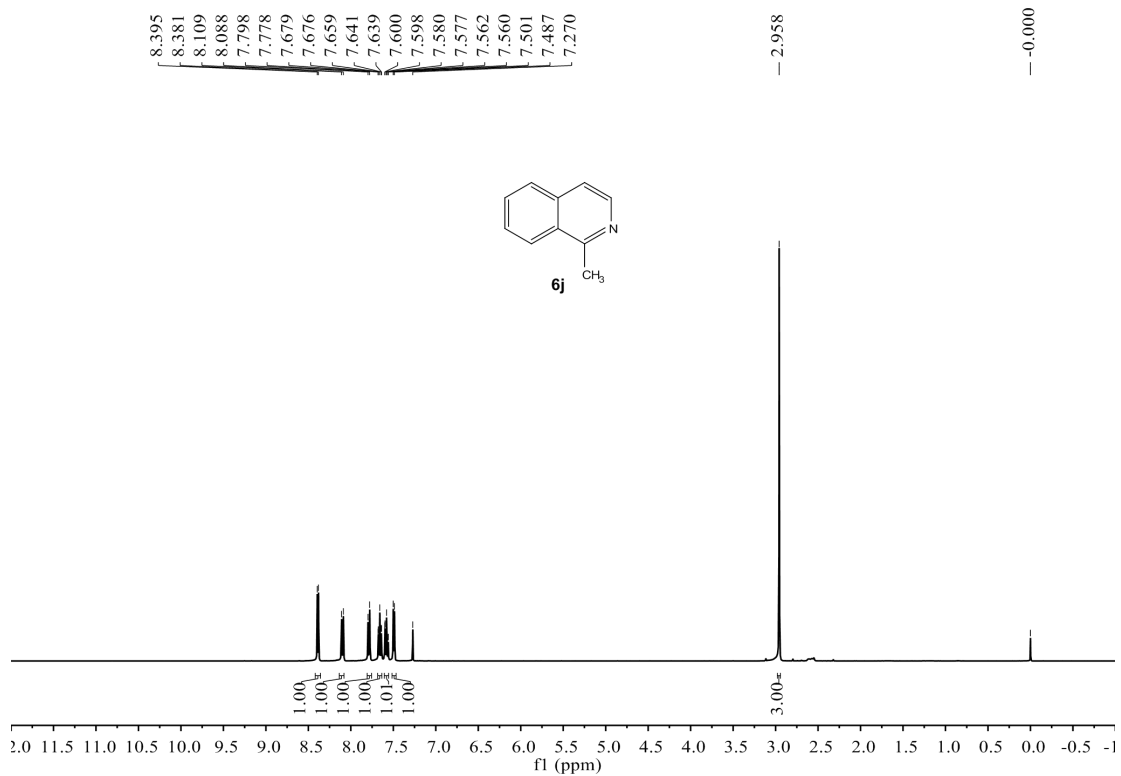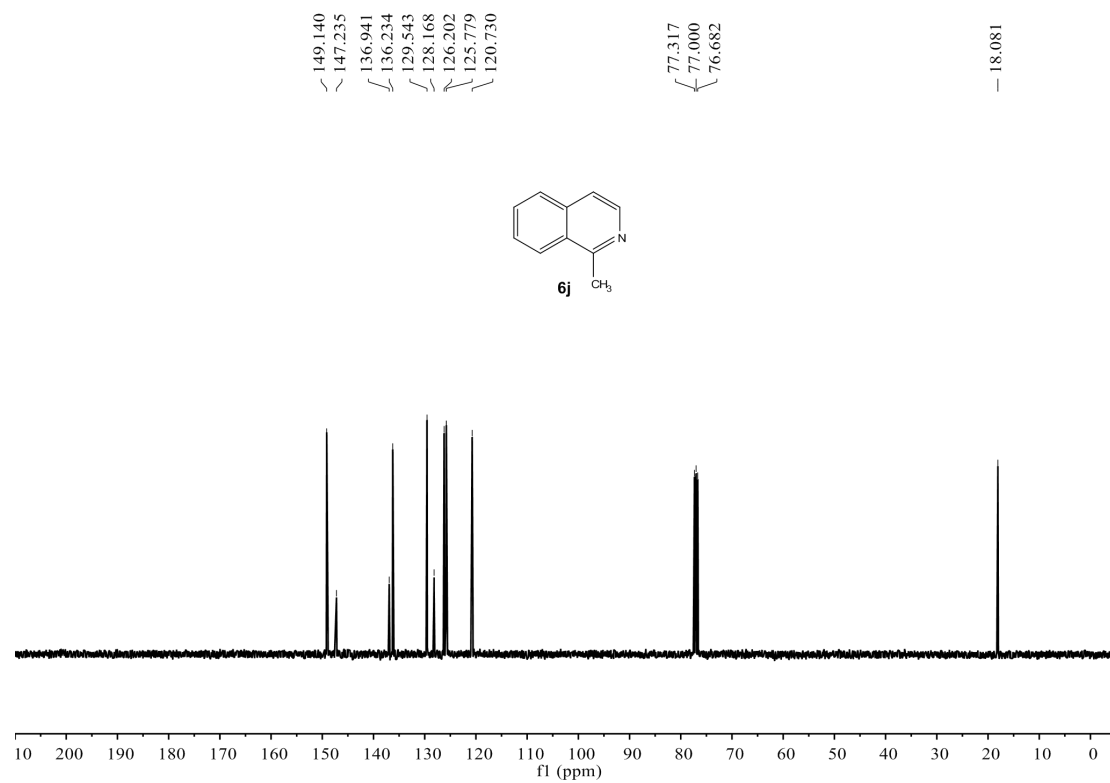

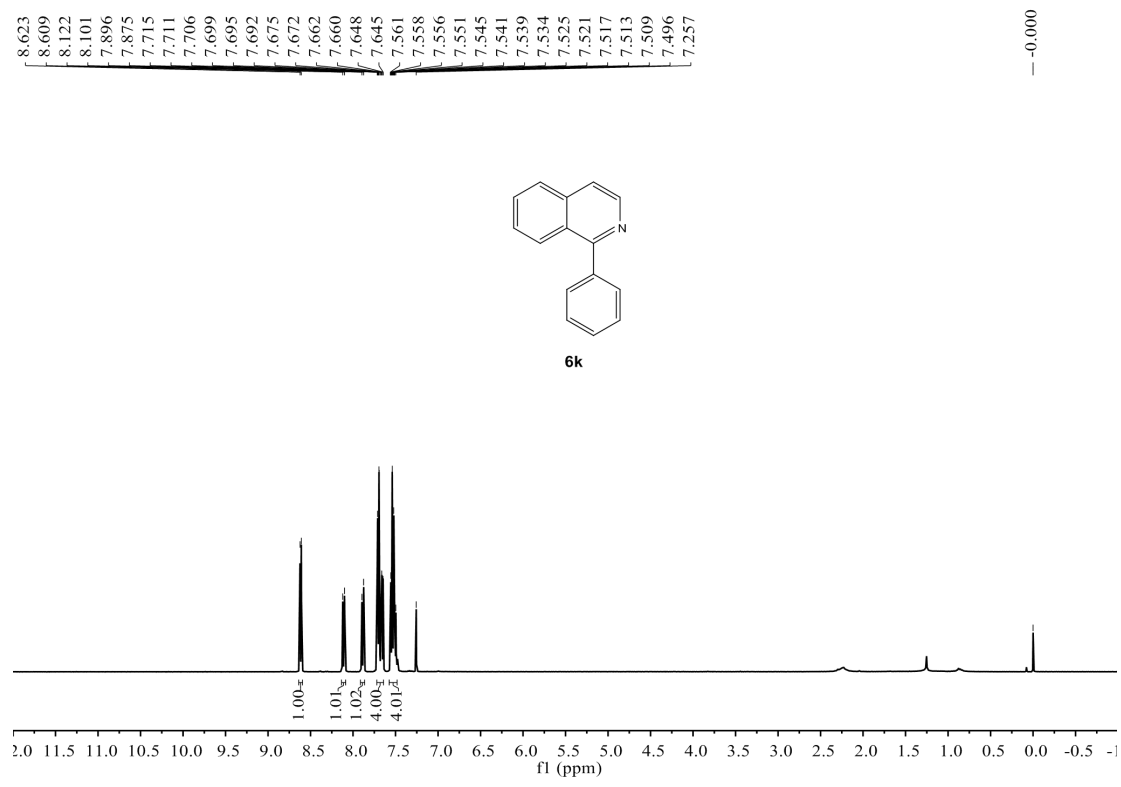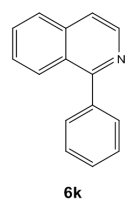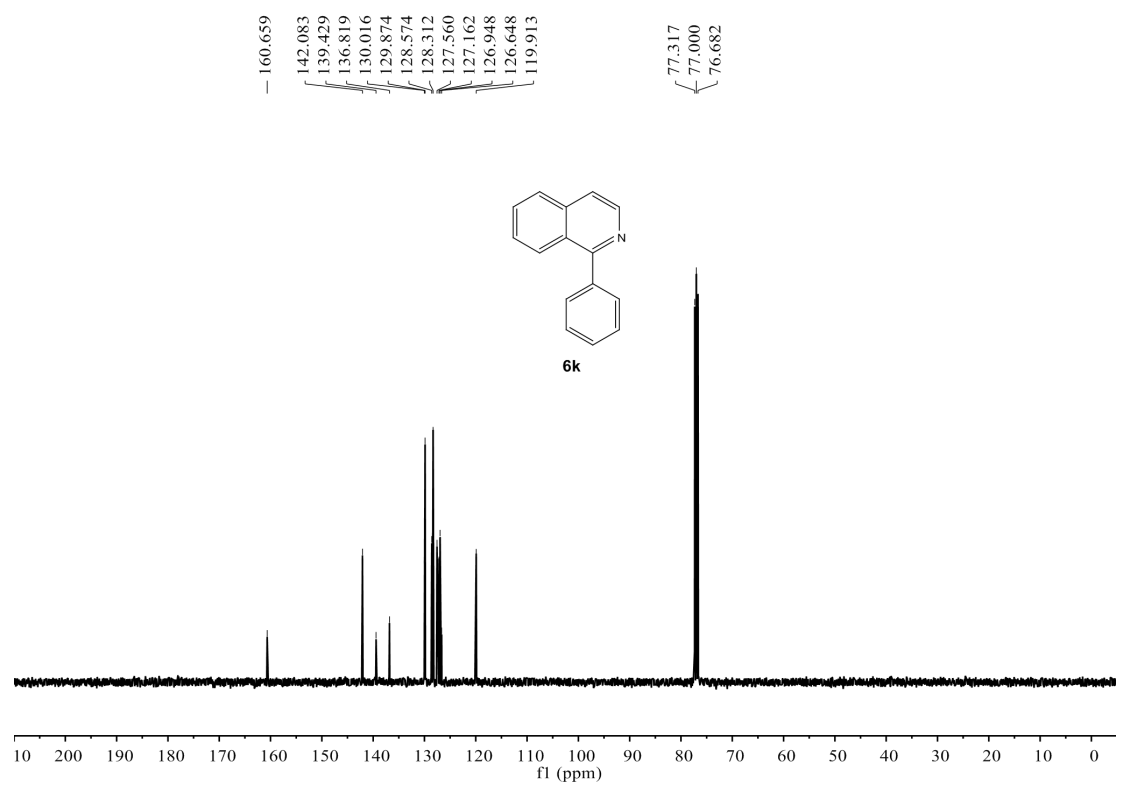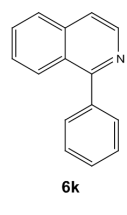

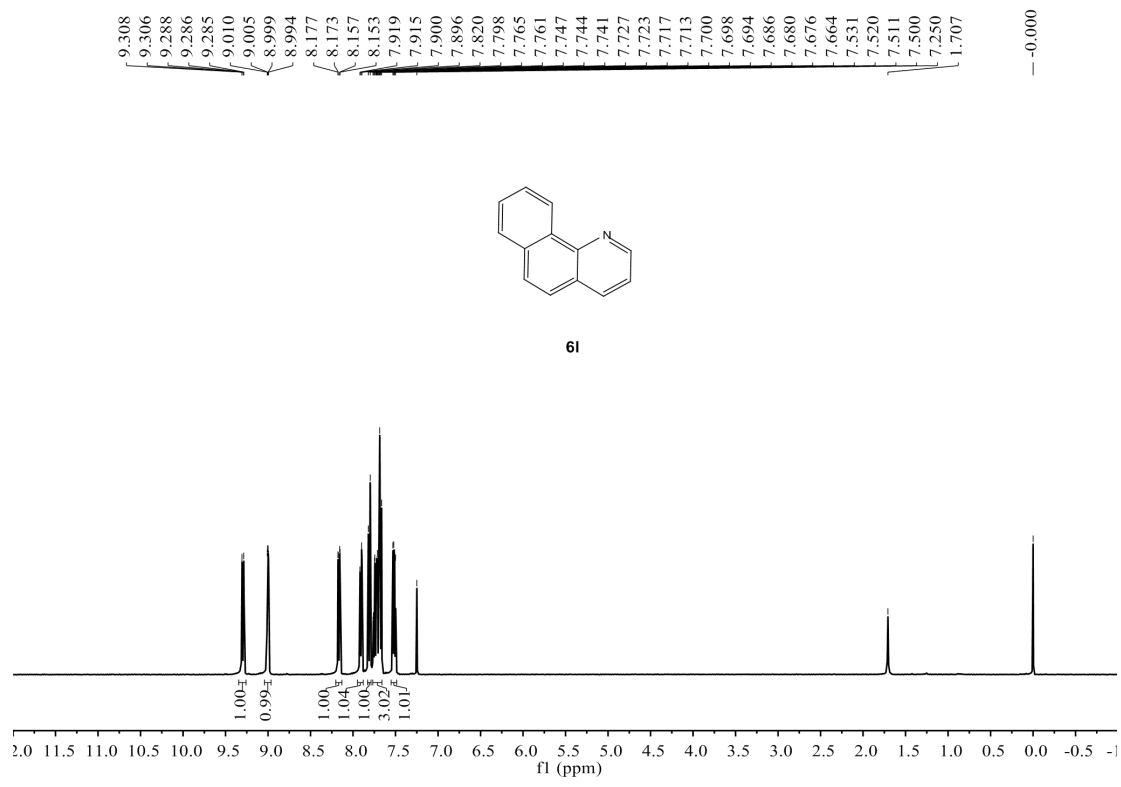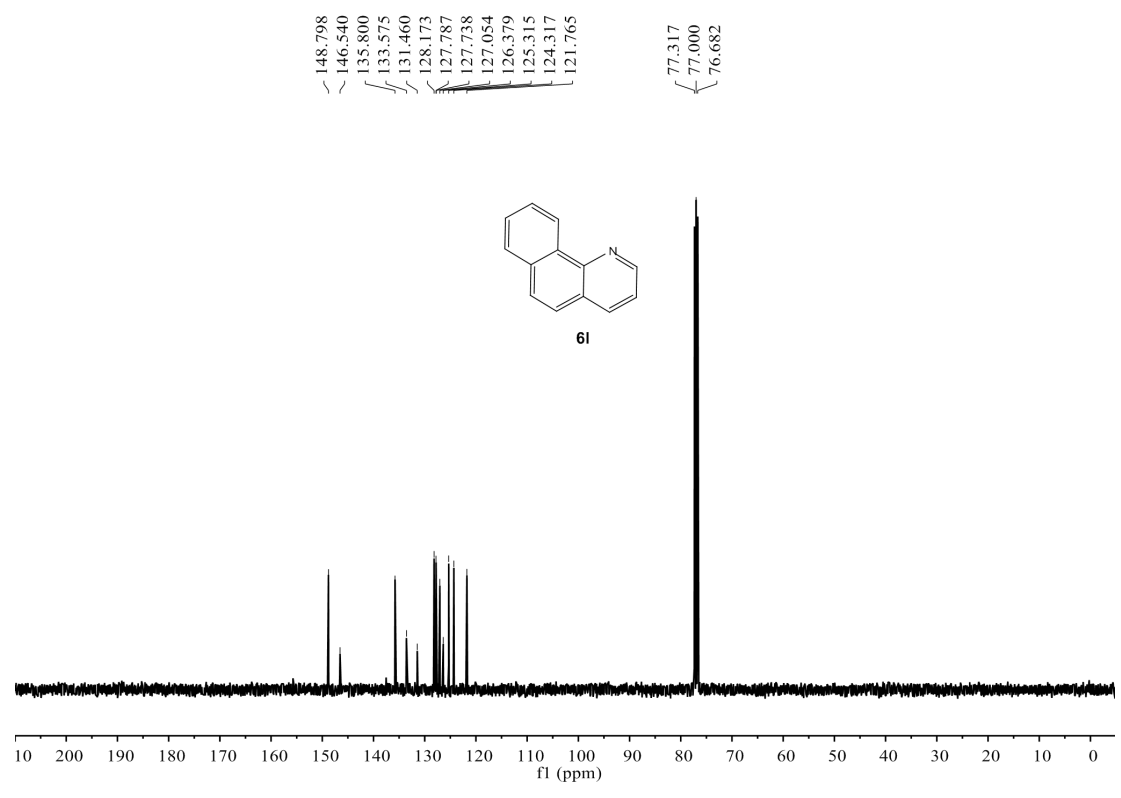

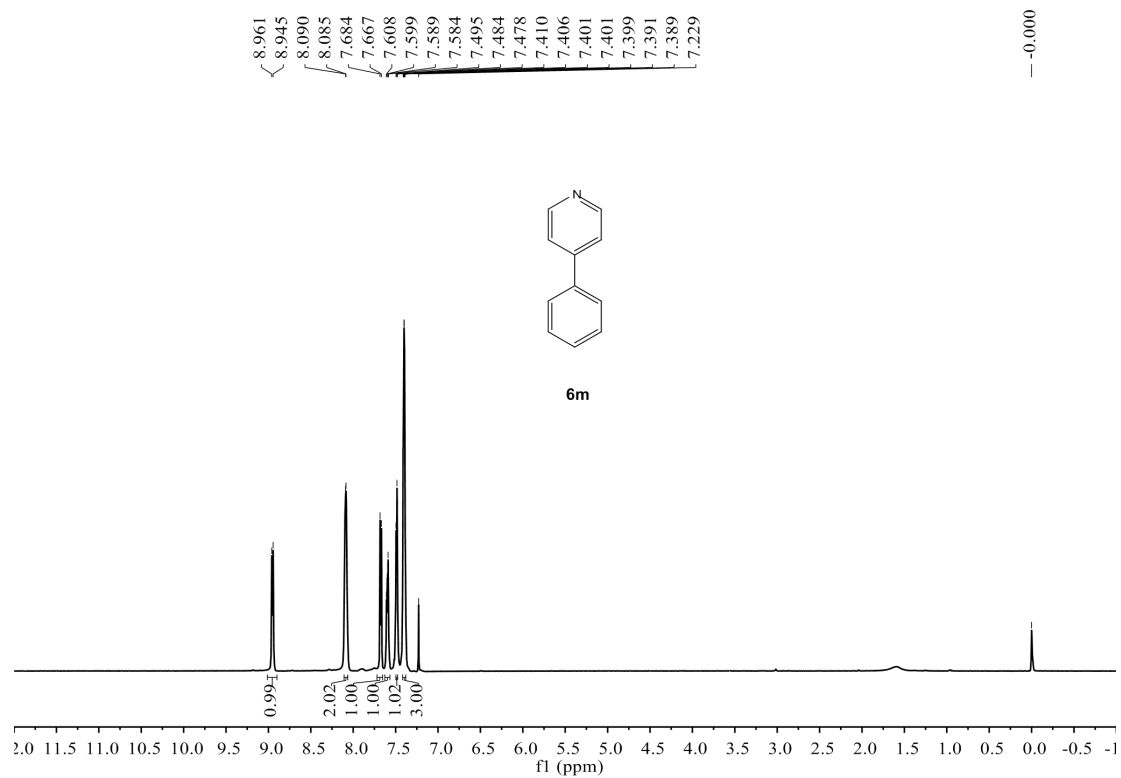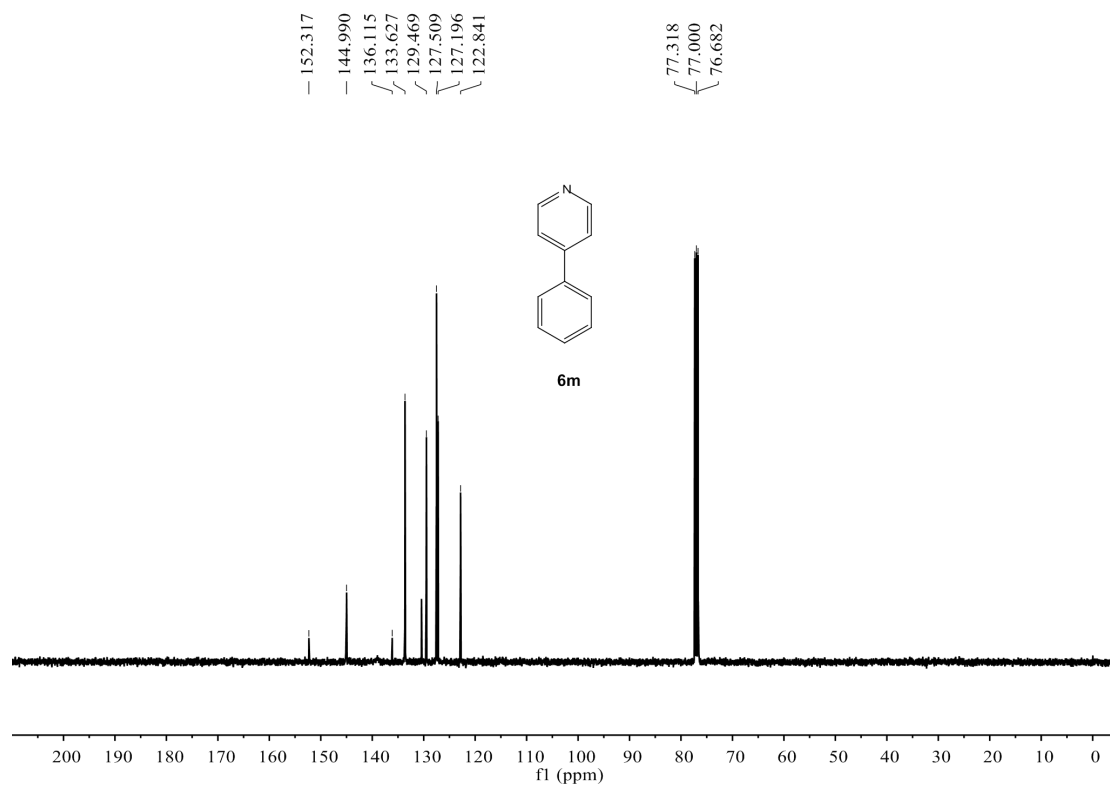

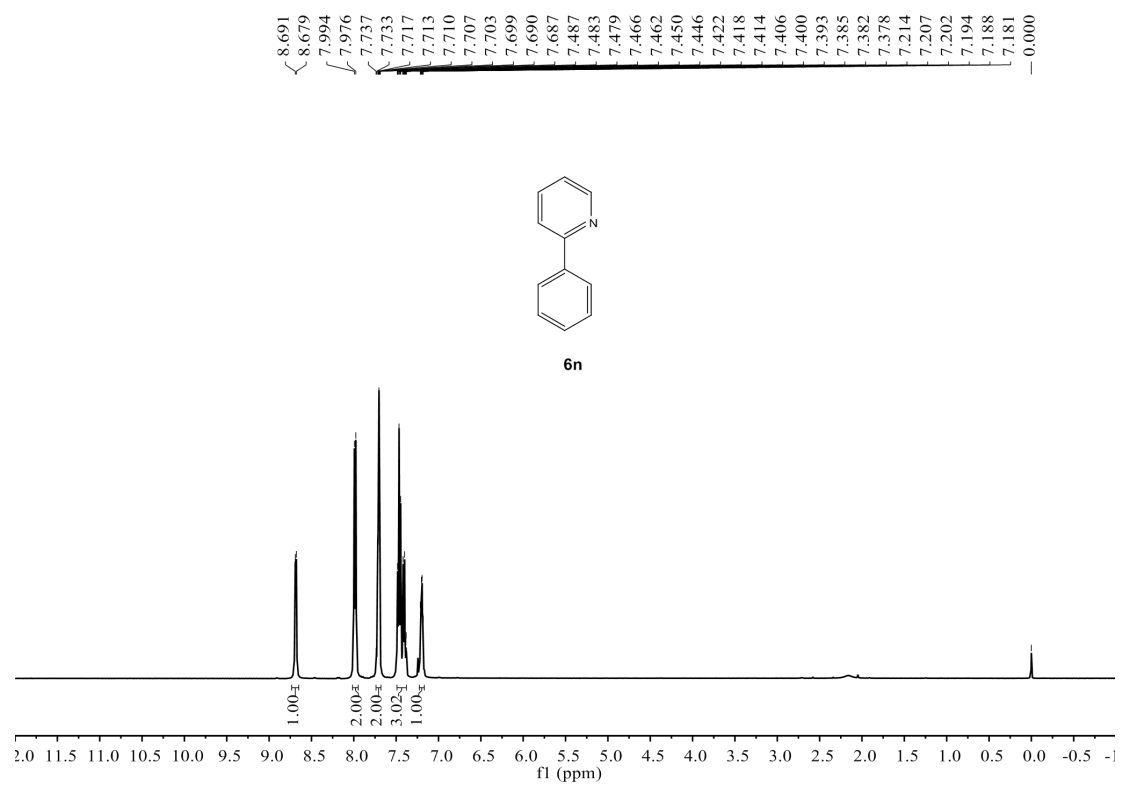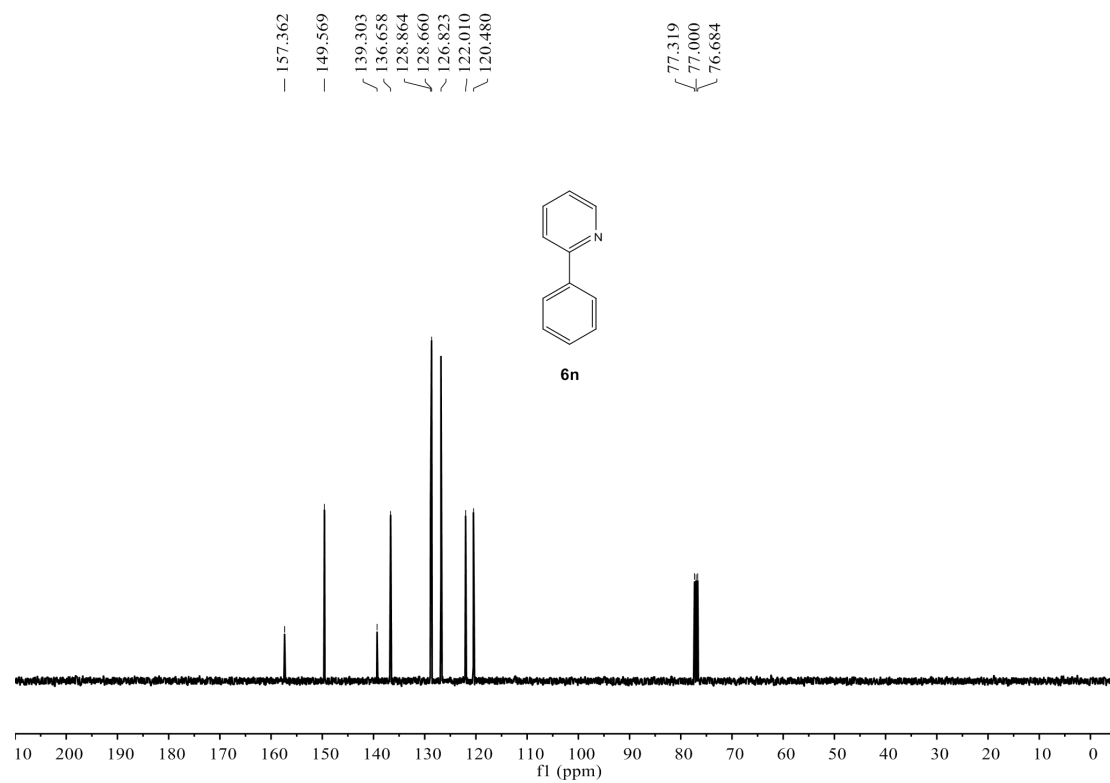

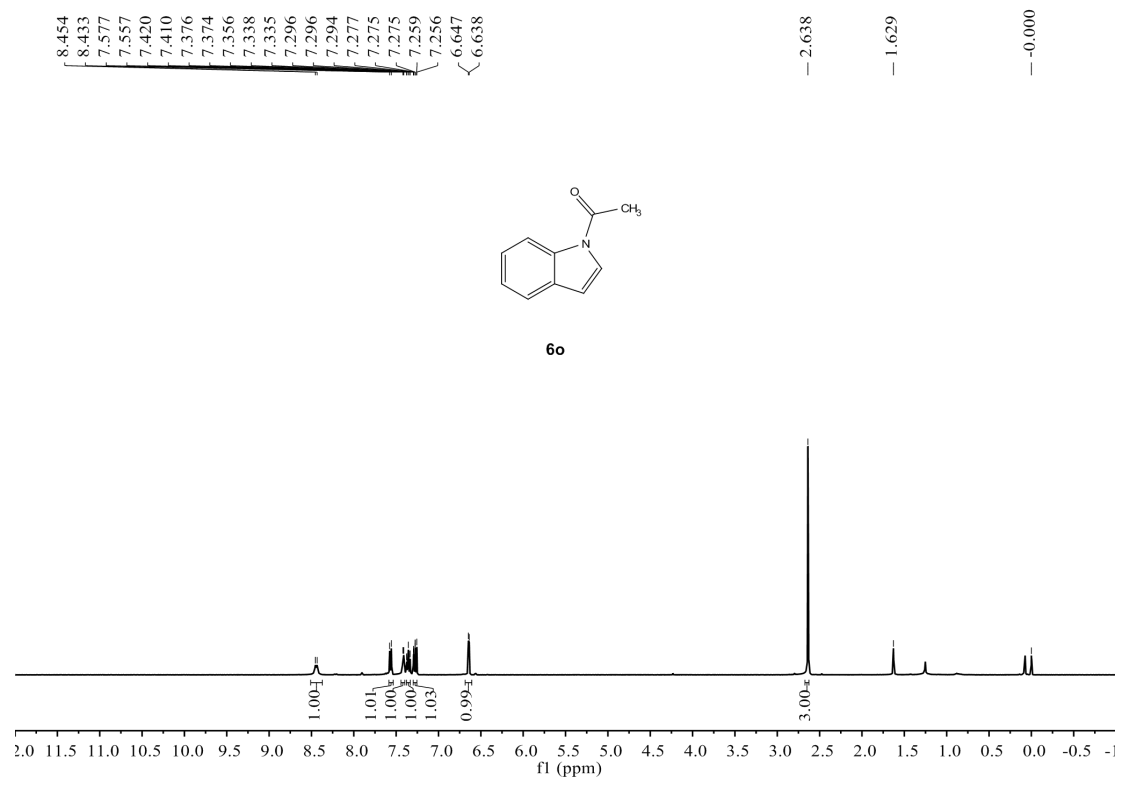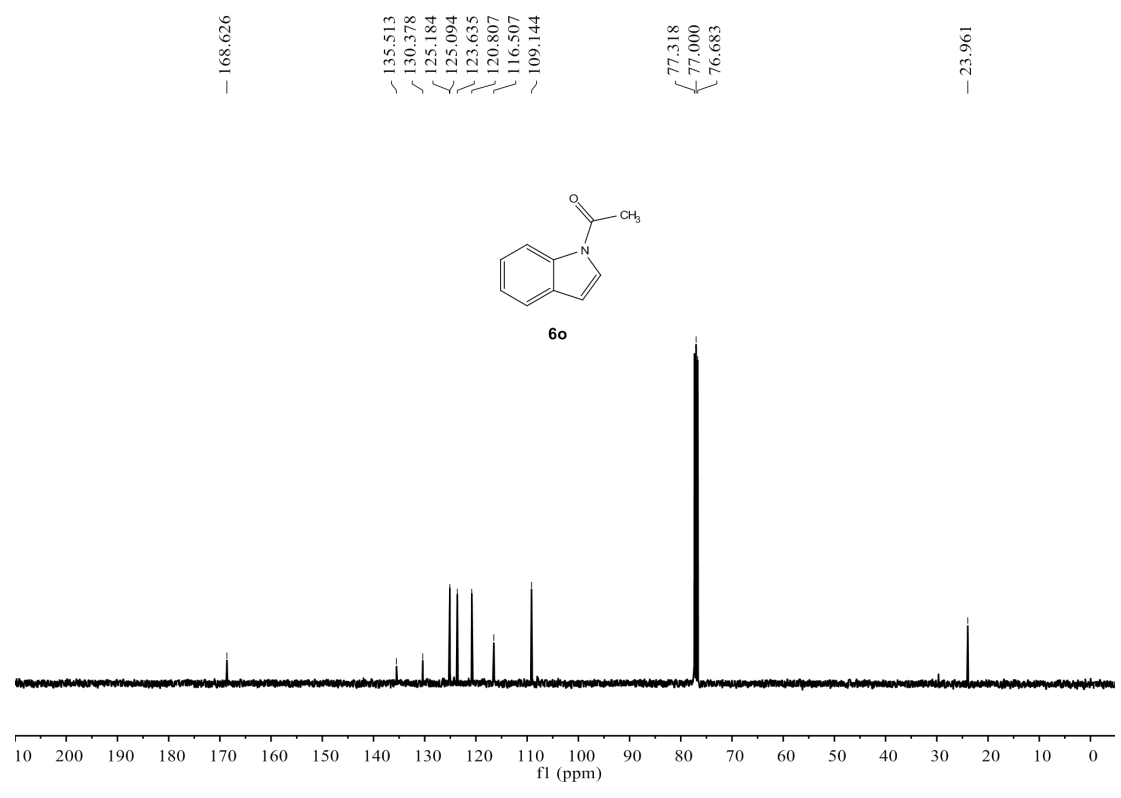

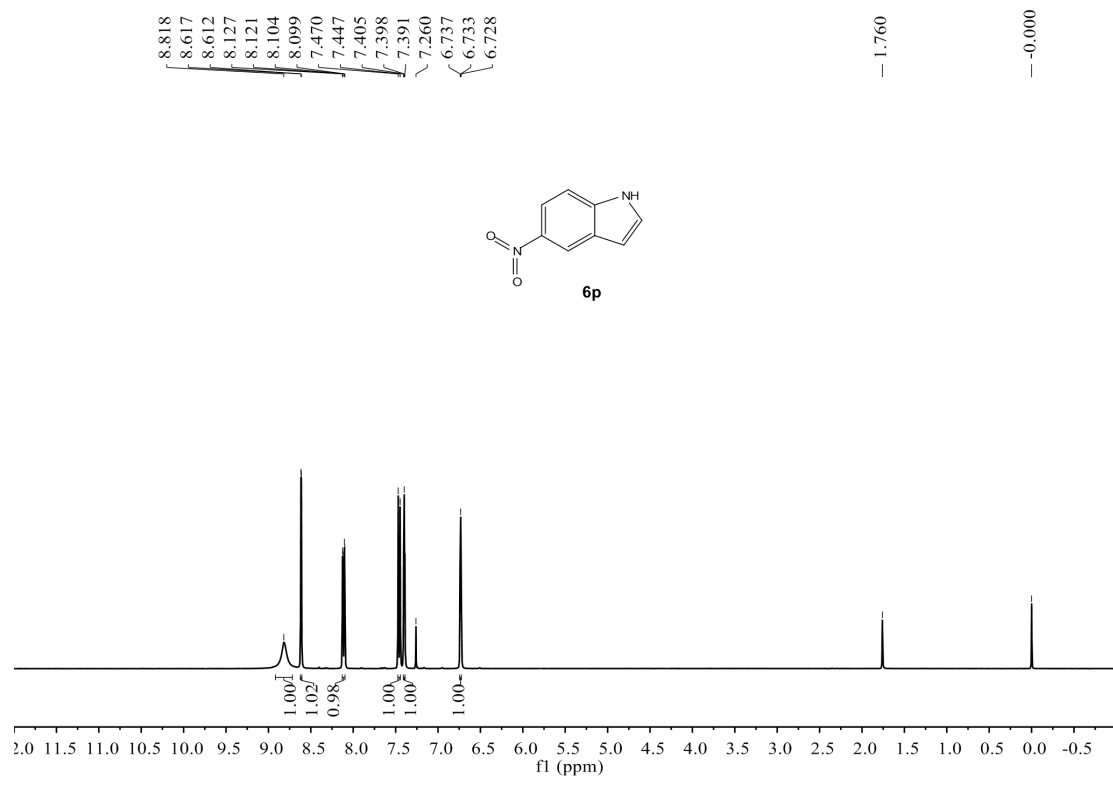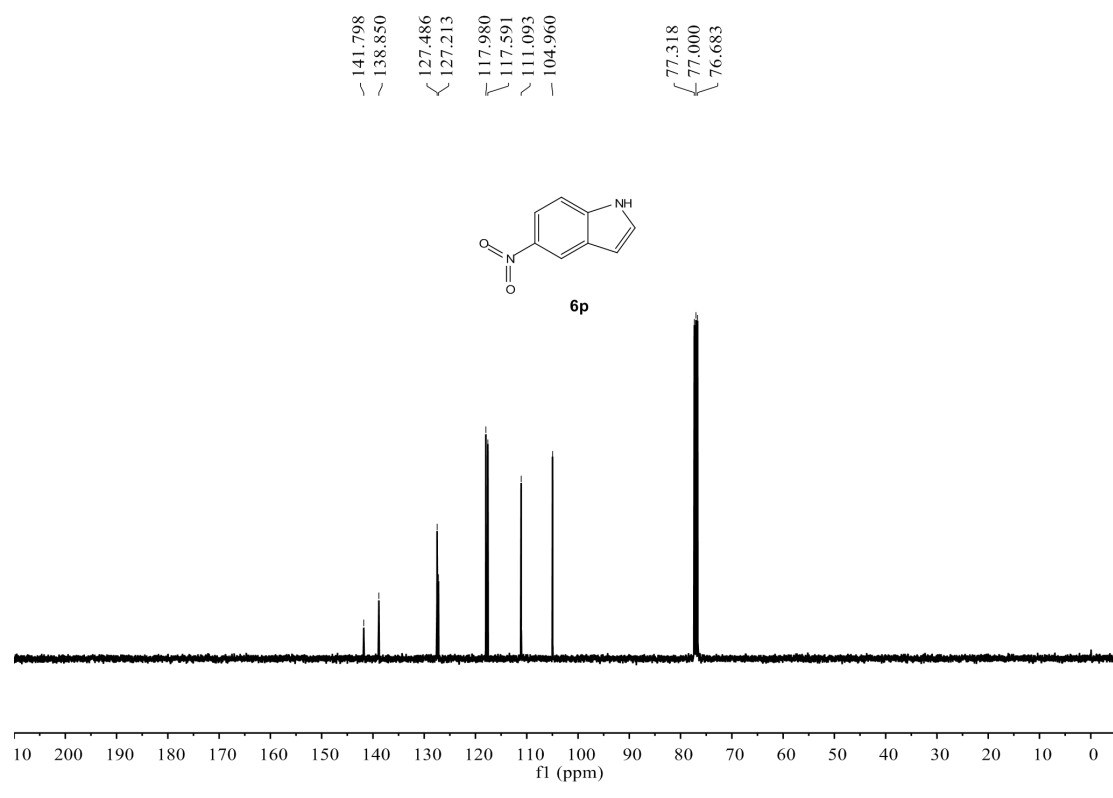

Supplement: c9ra10964a1.pdf [file c9ra10964a1.pdf]
